# Supplementary material for: Multi-scale simulations of excited-state energy transfer pathways in the C 2 S 2 -type PSII–LHCII supercomplex of spinach
Source: Royal Society of Chemistry journal article supplement (doi:10.1039/d5cp03498a), 2026-01-01
Supplement: d5cp03498a1.xlsx [file d5cp03498a1.xlsx]

## Sheet: Table DS1
Table S1 Site Energies of PSII-LHCII Pigment Molecules Calculated by QM/MM.
Subunit	Pigment	Site energy of frame 1(eV)	Site energy of frame 2(eV)	Site energy of frame 3(eV)	Site energy of frame 4(eV)	Site energy of frame 5(eV)	Site energy of frame 6(eV)	Site energy of frame 7(eV)	Site energy of frame 8(eV)	Site energy of frame 9(eV)	Site energy of frame 10(eV)	Site energy of frame 11(eV)	Site energy of frame 12(eV)	Site energy of frame 13(eV)	Site energy of frame 14(eV)	Site energy of frame 15(eV)	Site energy of frame 16(eV)	Site energy of frame 17(eV)	Site energy of frame 18(eV)	Site energy of frame 19(eV)	Site energy of frame 20(eV)	Average Site energy(eV)	SD
LHCⅡ M1	b601	2.2334	2.2517	2.2349	2.2628	2.2402	2.2054	2.2629	2.2697	2.2421	2.247	2.2677	2.23	2.2632	2.2484	2.235	2.2782	2.2636	2.2028	2.2177	2.2437	2.24502	0.0203611
	a602	2.1511	2.1581	2.1508	2.1756	2.1691	2.1615	2.1614	2.1311	2.1817	2.1752	2.1353	2.1596	2.1681	2.1286	2.1733	2.1531	2.1703	2.1469	2.1404	2.131	2.15611	0.0160024
	a603	2.1571	2.1583	2.1659	2.1476	2.1511	2.1459	2.1372	2.1339	2.1465	2.1456	2.1459	2.1426	2.1608	2.1511	2.1567	2.1619	2.1729	2.1504	2.1587	2.1552	2.15227	0.00935726
	a604	2.1637	2.1357	2.1394	2.1695	2.1435	2.1326	2.1308	2.1574	2.146	2.1495	2.1447	2.1347	2.1285	2.1219	2.1173	2.1287	2.1381	2.1429	2.1406	2.1447	2.14051	0.0126762
	b605	2.2501	2.2608	2.2705	2.2715	2.2788	2.2766	2.224	2.276	2.2354	2.2587	2.2511	2.2706	2.2483	2.2471	2.2502	2.2677	2.2558	2.2703	2.237	2.2671	2.25838	0.0148826
	b606	2.2366	2.2622	2.2518	2.2555	2.2651	2.2264	2.2416	2.22	2.2704	2.2512	2.2539	2.2463	2.2532	2.2477	2.2363	2.2529	2.259	2.2648	2.2582	2.249	2.25011	0.0125372
	b607	2.2383	2.1836	2.2364	2.2521	2.2128	2.199	2.2075	2.2209	2.2037	2.2068	2.2285	2.2168	2.2029	2.2198	2.2206	2.207	2.2301	2.2009	2.2439	2.2259	2.21787	0.0166971
	b608	2.2549	2.2754	2.2528	2.2581	2.2637	2.2557	2.2515	2.2718	2.2526	2.2505	2.2457	2.2534	2.2616	2.2696	2.2589	2.2542	2.2642	2.2776	2.2536	2.246	2.25859	0.00897084
	b609	2.2709	2.2872	2.2849	2.2947	2.2665	2.2823	2.2296	2.2824	2.2592	2.2789	2.2781	2.2787	2.2829	2.2638	2.2772	2.2728	2.2805	2.27	2.2773	2.2791	2.27485	0.0131449
	a610	2.145	2.1406	2.1493	2.1554	2.1628	2.1425	2.1504	2.1611	2.1386	2.1461	2.1636	2.1482	2.1577	2.1666	2.1558	2.1266	2.1453	2.1719	2.1664	2.1476	2.15208	0.0110141
	a611	2.1434	2.1431	2.163	2.1508	2.1163	2.1621	2.1381	2.1565	2.1532	2.1323	2.1353	2.1432	2.1295	2.1567	2.1359	2.12	2.1416	2.1262	2.1245	2.1404	2.1406	0.0132111
	a612	2.1449	2.1355	2.129	2.1412	2.1384	2.1514	2.1384	2.1461	2.1443	2.133	2.146	2.1313	2.1497	2.1545	2.1624	2.1694	2.1498	2.1698	2.1417	2.1447	2.14608	0.0110896
	a613	2.1528	2.1509	2.1573	2.1432	2.1614	2.2008	2.1472	2.1371	2.1581	2.1591	2.1286	2.1248	2.1376	2.1476	2.1272	2.1103	2.14	2.1216	2.1439	2.1478	2.14487	0.0185892
	a614	2.1288	2.1407	2.1562	2.1259	2.1303	2.1444	2.1235	2.1322	2.1234	2.1272	2.1405	2.1212	2.1586	2.1226	2.1229	2.1366	2.1309	2.1279	2.1135	2.124	2.13156	0.0112783
LHCⅡ M2	b601	2.2899	2.2696	2.2688	2.2736	2.2253	2.2511	2.2671	2.2607	2.2532	2.263	2.245	2.2811	2.2482	2.2463	2.2308	2.2285	2.262	2.2686	2.2499	2.2245	2.25536	0.0180134
	a602	2.1526	2.1545	2.1464	2.1974	2.1539	2.1722	2.1892	2.1789	2.1527	2.199	2.1563	2.1597	2.1544	2.1899	2.1987	2.2106	2.2214	2.2066	2.1857	2.155	2.17675	0.0230744
	a603	2.1529	2.1361	2.1434	2.1767	2.1491	2.1693	2.1468	2.1816	2.1489	2.1351	2.1651	2.147	2.1705	2.1528	2.1664	2.1458	2.1551	2.1403	2.1462	2.1554	2.15422	0.0128875
	a604	2.1406	2.1336	2.1265	2.1606	2.1212	2.148	2.1342	2.1448	2.1414	2.1625	2.1555	2.1593	2.1206	2.1379	2.1229	2.102	2.138	2.1469	2.1422	2.1249	2.13818	0.0151301
	b605	2.2832	2.2924	2.2409	2.2684	2.2815	2.2576	2.2967	2.2466	2.2686	2.251	2.2464	2.2801	2.2839	2.2694	2.2777	2.2854	2.2759	2.2756	2.2537	2.2816	2.27083	0.0158689
	b606	2.2479	2.245	2.2477	2.2626	2.2421	2.2349	2.2783	2.2526	2.2575	2.2505	2.2335	2.2535	2.255	2.2543	2.2375	2.2653	2.2491	2.2452	2.2534	2.2688	2.25173	0.010943
	b607	2.2294	2.2268	2.224	2.2462	2.2388	2.258	2.2459	2.2224	2.2047	2.2464	2.2547	2.2011	2.2139	2.2474	2.2553	2.2467	2.1745	2.2347	2.1889	2.2492	2.23045	0.0228828
	b608	2.251	2.2512	2.247	2.2391	2.254	2.2447	2.2306	2.2421	2.2503	2.2463	2.2522	2.2277	2.2529	2.2521	2.2656	2.2332	2.2526	2.2418	2.2446	2.2288	2.24539	0.00947364
	b609	2.2485	2.2447	2.2495	2.2623	2.2609	2.2858	2.2579	2.2644	2.1994	2.3	2.2949	2.288	2.2535	2.2871	2.2519	2.2279	2.2722	2.2825	2.2494	2.266	2.26234	0.023466
	a610	2.131	2.2064	2.1781	2.1703	2.1369	2.1329	2.1474	2.1738	2.1682	2.1636	2.1433	2.1346	2.142	2.159	2.137	2.1209	2.1301	2.1313	2.1521	2.1769	2.15179	0.0213888
	a611	2.1338	2.1288	2.1403	2.1194	2.1557	2.1383	2.1348	2.1307	2.1487	2.1303	2.1612	2.1501	2.1286	2.1427	2.1317	2.1337	2.1688	2.1022	2.1123	2.1267	2.13594	0.0154775
	a612	2.1568	2.1666	2.1467	2.1782	2.1654	2.1651	2.1768	2.1838	2.1692	2.2	2.1799	2.1805	2.1646	2.1609	2.1778	2.168	2.1673	2.1534	2.1515	2.1685	2.16905	0.0121918
	a613	2.1672	2.1587	2.1626	2.125	2.1528	2.1449	2.1532	2.1435	2.1403	2.1247	2.1329	2.1569	2.1598	2.1618	2.1608	2.1351	2.1394	2.1612	2.1545	2.1772	2.15063	0.0139281
	a614	2.155	2.1552	2.1281	2.1369	2.1242	2.1279	2.1391	2.1319	2.1458	2.108	2.1504	2.1381	2.128	2.1486	2.1329	2.1107	2.1399	2.1268	2.1298	2.1393	2.13483	0.0124704
LHCⅡ M3	b601	2.2809	2.2926	2.2855	2.2802	2.274	2.2792	2.2663	2.2924	2.27	2.2731	2.2608	2.2637	2.2912	2.28	2.2517	2.2627	2.2775	2.269	2.2798	2.2706	2.27506	0.010731
	a602	2.1639	2.1841	2.1771	2.1857	2.1313	2.1353	2.1549	2.1631	2.1913	2.1615	2.1982	2.1474	2.151	2.2064	2.1677	2.1833	2.1025	2.1636	2.1375	2.1898	2.16478	0.02521
	a603	2.1365	2.1467	2.1157	2.1565	2.1395	2.1414	2.1626	2.1447	2.1321	2.1542	2.1465	2.146	2.1438	2.1492	2.1567	2.1445	2.1398	2.1263	2.1639	2.1169	2.14317	0.0128187
	a604	2.1342	2.1467	2.1384	2.1385	2.1529	2.1535	2.123	2.1574	2.1616	2.1485	2.136	2.1523	2.1465	2.1509	2.1426	2.1323	2.1677	2.1439	2.1243	2.1132	2.14322	0.0132228
	b605	2.2412	2.2517	2.2352	2.2281	2.2236	2.2279	2.2437	2.241	2.2546	2.239	2.2537	2.2544	2.253	2.2449	2.2377	2.2507	2.2344	2.2217	2.2472	2.2371	2.24104	0.0101487
	b606	2.2456	2.2642	2.222	2.2591	2.243	2.2494	2.2564	2.2384	2.2542	2.255	2.2402	2.2429	2.2297	2.2524	2.2472	2.251	2.2627	2.2522	2.2694	2.2349	2.2485	0.0115188
	b607	2.2617	2.2423	2.2662	2.2354	2.2686	2.2286	2.2332	2.2428	2.2478	2.2682	2.2302	2.2571	2.2536	2.2837	2.2392	2.2702	2.2627	2.2691	2.2598	2.2599	2.25401	0.0152633
	b608	2.265	2.2703	2.2897	2.2595	2.248	2.2856	2.2687	2.2932	2.2546	2.2721	2.2254	2.2711	2.2605	2.2428	2.2841	2.2644	2.2624	2.2787	2.2803	2.27	2.26732	0.0160916
	b609	2.2706	2.2763	2.2774	2.2782	2.2653	2.234	2.2563	2.2757	2.2818	2.299	2.274	2.2711	2.2936	2.252	2.2565	2.285	2.2832	2.2811	2.2744	2.281	2.27333	0.014496
	a610	2.136	2.1312	2.1317	2.1211	2.1366	2.1199	2.1149	2.1424	2.1456	2.1138	2.125	2.1337	2.1158	2.1028	2.1278	2.1235	2.1377	2.1179	2.1229	2.0893	2.12448	0.0131968
	a611	2.1204	2.1435	2.1332	2.1317	2.1436	2.1373	2.1532	2.128	2.1354	2.1546	2.1483	2.1442	2.1372	2.1153	2.1489	2.1493	2.1452	2.1389	2.1247	2.1543	2.13936	0.0109844
	a612	2.1536	2.1562	2.1695	2.175	2.188	2.1869	2.1783	2.1657	2.162	2.162	2.162	2.1672	2.1547	2.1828	2.1637	2.1773	2.1626	2.1747	2.1643	2.1572	2.16819	0.0101973
	a613	2.125	2.123	2.1546	2.1658	2.1073	2.1486	2.1502	2.1437	2.1318	2.1677	2.1539	2.1403	2.1169	2.1282	2.1366	2.1841	2.1436	2.1257	2.1382	2.1485	2.14168	0.0180928
	a614	2.1188	2.1128	2.1118	2.1469	2.1363	2.1123	2.1454	2.1052	2.1136	2.1285	2.1152	2.119	2.1289	2.1316	2.126	2.1204	2.1186	2.1354	2.1213	2.1158	2.12319	0.0111252
CP29	a601	2.1611	2.1245	2.1307	2.131	2.1191	2.1282	2.1272	2.136	2.1065	2.1296	2.1183	2.1269	2.1369	2.1177	2.1051	2.125	2.1313	2.1164	2.118	2.1278	2.12587	0.0116215
	a602	2.1603	2.1747	2.1377	2.1484	2.123	2.1532	2.1373	2.1096	2.119	2.1486	2.149	2.1405	2.1389	2.1215	2.1441	2.1288	2.1513	2.1291	2.1575	2.1553	2.14139	0.0156793
	a603	2.1409	2.1487	2.1224	2.1319	2.1482	2.1326	2.1403	2.1434	2.1361	2.1402	2.1286	2.1584	2.1398	2.1349	2.138	2.1421	2.1464	2.1379	2.1372	2.1376	2.13928	0.00759063
	a604	2.1243	2.132	2.1074	2.1476	2.1449	2.1505	2.1144	2.1274	2.146	2.1156	2.1423	2.124	2.1184	2.1441	2.1416	2.1349	2.1379	2.1135	2.1382	2.1222	2.13136	0.0128797
	b606	2.2681	2.2635	2.2431	2.2664	2.1718	2.2586	2.2679	2.277	2.2417	2.2699	2.2512	2.2383	2.2602	2.2367	2.257	2.2515	2.2472	2.2568	2.2359	2.2384	2.25006	0.0216654
	b607	2.2173	2.2223	2.2443	2.2346	2.2257	2.2383	2.2642	2.2404	2.2324	2.2675	2.231	2.2317	2.2707	2.252	2.2439	2.2471	2.1954	2.276	2.2437	2.2394	2.24089	0.0187997
	b608	2.2322	2.2649	2.2387	2.2587	2.27	2.2709	2.2354	2.2316	2.2515	2.2333	2.2528	2.2141	2.2611	2.2707	2.2445	2.2589	2.2205	2.2579	2.2223	2.2525	2.24712	0.017191
	a609	2.1743	2.1382	2.1168	2.1468	2.1476	2.1521	2.1778	2.1286	2.1547	2.1085	2.1213	2.1607	2.1718	2.1139	2.1441	2.1343	2.1472	2.1384	2.1393	2.1479	2.14322	0.0189288
	a610	2.1484	2.1308	2.1455	2.1039	2.1432	2.1426	2.1491	2.1185	2.1582	2.1393	2.1359	2.139	2.1633	2.1836	2.1605	2.1224	2.1621	2.1836	2.1578	2.1319	2.14598	0.019533
	a611	2.1562	2.1718	2.1624	2.1303	2.1645	2.1544	2.1418	2.1443	2.1674	2.1662	2.1413	2.1446	2.1639	2.1402	2.1576	2.1331	2.1627	2.1472	2.1375	2.1155	2.15015	0.0144961
	a612	2.156	2.1324	2.1382	2.1365	2.1493	2.1659	2.1518	2.1553	2.1497	2.1525	2.1333	2.1501	2.1428	2.1492	2.1264	2.1336	2.1318	2.1486	2.1409	2.1439	2.14441	0.00985844
	a613	2.1186	2.1252	2.1261	2.1526	2.1241	2.1218	2.14	2.1531	2.1163	2.1484	2.118	2.1311	2.1345	2.1297	2.1243	2.1246	2.1439	2.1333	2.1377	2.1187	2.1311	0.0112582
	a616	2.1485	2.1388	2.1248	2.1478	2.1398	2.1426	2.114	2.1421	2.1239	2.1644	2.1589	2.1503	2.1445	2.1456	2.1681	2.1712	2.1393	2.151	2.1711	2.1458	2.14663	0.0148826
CP26	b601	2.2152	2.2282	2.2335	2.2393	2.2432	2.211	2.2416	2.2486	2.2296	2.2268	2.2144	2.2263	2.2126	2.2143	2.2691	2.2683	2.2676	2.2569	2.2445	2.24	2.23655	0.0183559
	a602	2.1706	2.1792	2.1847	2.1535	2.1934	2.151	2.1697	2.1835	2.1855	2.1725	2.1714	2.1709	2.191	2.149	2.1865	2.1909	2.1788	2.1851	2.1841	2.1987	2.1775	0.0136153
	a603	2.1214	2.1528	2.1311	2.1396	2.1222	2.1224	2.1324	2.1429	2.1454	2.1472	2.1632	2.1698	2.1175	2.1413	2.138	2.1479	2.1187	2.1176	2.1406	2.1379	2.1375	0.0144884
	a604	2.1412	2.1382	2.1294	2.1333	2.1316	2.1309	2.1423	2.1279	2.1288	2.1555	2.1378	2.121	2.1292	2.139	2.1215	2.139	2.1161	2.1497	2.1538	2.1319	2.13491	0.0101528
	b606	2.2654	2.2306	2.2237	2.2425	2.2416	2.2527	2.2884	2.2685	2.3062	2.2373	2.2568	2.2654	2.2736	2.2372	2.2403	2.2488	2.2323	2.3259	2.2456	2.2303	2.25566	0.0259976
	b607	2.2337	2.2375	2.2399	2.2528	2.2524	2.2463	2.2465	2.225	2.2374	2.2376	2.2213	2.2489	2.234	2.2369	2.2432	2.2235	2.229	2.2566	2.2338	2.2137	2.2375	0.0110492
	b608	2.2411	2.2411	2.2511	2.222	2.2417	2.2683	2.2586	2.2627	2.2315	2.2167	2.2486	2.2128	2.1988	2.2388	2.2382	2.2182	2.2699	2.2624	2.2378	2.2487	2.24045	0.0189647
	a609	2.1112	2.143	2.1368	2.1375	2.1633	2.1343	2.1409	2.1566	2.1372	2.1082	2.1294	2.1515	2.1504	2.1072	2.1512	2.1289	2.1512	2.1162	2.1216	2.1407	2.13587	0.0159562
	a610	2.1049	2.136	2.1369	2.1592	2.1204	2.1227	2.1415	2.1353	2.1184	2.1302	2.1439	2.1397	2.1232	2.1386	2.1237	2.1302	2.1383	2.1263	2.1302	2.1158	2.13077	0.0116754
	a611	2.1407	2.1353	2.1194	2.1516	2.1415	2.1308	2.1536	2.1158	2.1333	2.1588	2.1395	2.1401	2.1464	2.1381	2.1128	2.1359	2.1173	2.1224	2.1413	2.1286	2.13516	0.012504
	a612	2.1704	2.1643	2.1816	2.1697	2.1583	2.1538	2.1538	2.1563	2.1993	2.1884	2.1689	2.1516	2.1847	2.1615	2.1796	2.1587	2.1636	2.1833	2.1703	2.1705	2.16943	0.0127935
	a613	2.1451	2.19	2.1577	2.1538	2.1427	2.1605	2.1579	2.1535	2.165	2.1357	2.1527	2.1431	2.1538	2.1245	2.111	2.1411	2.1354	2.135	2.1334	2.1529	2.14724	0.0162096
	a614	2.1376	2.136	2.1361	2.1226	2.1431	2.1414	2.1179	2.1324	2.1304	2.1381	2.1295	2.1462	2.1319	2.1433	2.1325	2.1306	2.141	2.1373	2.1297	2.1315	2.13445	0.00683641
CP47	a602	2.126	2.117	2.1047	2.0961	2.104	2.1281	2.1155	2.1317	2.141	2.0997	2.113	2.1203	2.1506	2.1094	2.1164	2.1218	2.1203	2.1502	2.1406	2.1281	2.12172	0.0152295
	a603	2.1378	2.1253	2.1344	2.1524	2.1076	2.1405	2.1238	2.138	2.1479	2.152	2.1229	2.1341	2.1385	2.1209	2.1564	2.1411	2.1388	2.1388	2.1295	2.1241	2.13524	0.0118451
	a604	2.1136	2.1316	2.1313	2.133	2.1354	2.1322	2.1417	2.1228	2.1479	2.1397	2.1486	2.1417	2.1283	2.1175	2.1081	2.1194	2.1431	2.1348	2.1522	2.1682	2.13455	0.0139377
	a605	2.1577	2.1564	2.1615	2.156	2.1509	2.1381	2.1392	2.1488	2.1137	2.1576	2.1242	2.1454	2.1629	2.1606	2.163	2.156	2.1601	2.1321	2.1437	2.1486	2.14882	0.0132504
	a606	2.1297	2.1438	2.154	2.159	2.1129	2.1211	2.147	2.129	2.1133	2.1413	2.1269	2.1116	2.1184	2.1496	2.1058	2.1566	2.1479	2.1404	2.1093	2.1143	2.13159	0.0171588
	a607	2.1268	2.0965	2.1207	2.1321	2.099	2.1471	2.114	2.1011	2.1166	2.1257	2.1052	2.1401	2.1491	2.1076	2.1551	2.1173	2.1075	2.1222	2.0888	2.1518	2.12122	0.0191536
	a608	2.1487	2.1676	2.1271	2.1448	2.1219	2.1517	2.1464	2.1246	2.1128	2.1688	2.1315	2.1372	2.1435	2.1358	2.122	2.1197	2.1426	2.1163	2.1324	2.1323	2.13639	0.0151806
	a609	2.1585	2.1644	2.1324	2.1787	2.1579	2.1359	2.1636	2.1697	2.1552	2.1539	2.1648	2.1593	2.156	2.1529	2.1565	2.1457	2.1649	2.1661	2.1362	2.1754	2.1574	0.0120869
	a610	2.1325	2.1113	2.1133	2.1107	2.1129	2.1269	2.1012	2.0879	2.1119	2.0876	2.1091	2.1056	2.1058	2.0997	2.1073	2.0984	2.117	2.1144	2.0903	2.1058	2.10748	0.0112192
	a611	2.1131	2.0948	2.101	2.1101	2.1189	2.1185	2.1283	2.1302	2.09	2.1173	2.0837	2.1097	2.1273	2.1129	2.1097	2.1144	2.1449	2.1162	2.1348	2.098	2.11369	0.0148853
	a612	2.1192	2.1353	2.1422	2.1114	2.1088	2.1094	2.1258	2.1504	2.118	2.1341	2.1287	2.1327	2.135	2.1176	2.1338	2.1402	2.1361	2.1426	2.1446	2.1597	2.13128	0.013551
	a613	2.1587	2.1604	2.1574	2.1252	2.1795	2.1439	2.1232	2.1237	2.1442	2.1517	2.1555	2.1247	2.1627	2.1403	2.1561	2.1638	2.1409	2.1274	2.1805	2.1587	2.14893	0.0172298
	a614	2.1316	2.1044	2.0976	2.1068	2.11	2.1128	2.1203	2.1211	2.1309	2.1092	2.1283	2.1215	2.1066	2.1216	2.128	2.1008	2.1208	2.1275	2.1288	2.1372	2.11829	0.0111806
	a615	2.1177	2.1375	2.1273	2.1428	2.1505	2.1339	2.1251	2.142	2.1247	2.1555	2.1456	2.1403	2.1556	2.1365	2.1088	2.148	2.1368	2.1318	2.1234	2.1166	2.13502	0.0127467
	a616	2.1386	2.1624	2.1837	2.1543	2.1519	2.1346	2.1669	2.1948	2.1645	2.1486	2.174	2.1659	2.1559	2.1382	2.1643	2.1368	2.1583	2.1575	2.1465	2.1521	2.15749	0.0151409
	a617	2.1149	2.105	2.1159	2.1061	2.1207	2.0964	2.1136	2.1124	2.1095	2.1142	2.1119	2.1198	2.1063	2.1121	2.1142	2.1041	2.1191	2.1132	2.0879	2.1119	2.11046	0.00770106
CP43	a502	2.1224	2.1447	2.1332	2.1389	2.1345	2.1573	2.1422	2.1441	2.1489	2.1233	2.1334	2.1448	2.1392	2.1255	2.1361	2.1388	2.1143	2.1262	2.1516	2.1249	2.13621	0.0107464
	a503	2.1242	2.1226	2.1214	2.1189	2.1211	2.1234	2.1183	2.1513	2.1277	2.1237	2.1354	2.1247	2.133	2.1183	2.1316	2.119	2.1398	2.1195	2.1232	2.1102	2.12536	0.00890367
	a501	2.1227	2.1287	2.1287	2.1183	2.0848	2.1075	2.126	2.1069	2.0976	2.111	2.0976	2.1071	2.1304	2.11	2.1027	2.134	2.128	2.1127	2.1256	2.1057	2.1143	0.0130809
	a504	2.1609	2.1585	2.1441	2.1549	2.1654	2.1405	2.1685	2.1541	2.1469	2.1421	2.1516	2.1562	2.1625	2.1409	2.154	2.1541	2.1465	2.1548	2.127	2.1666	2.15251	0.0100886
	a505	2.1263	2.0937	2.1187	2.1299	2.1022	2.1051	2.1183	2.1369	2.1029	2.1253	2.129	2.097	2.1208	2.1201	2.1261	2.1258	2.1187	2.1082	2.1093	2.1072	2.11607	0.011772
	a506	2.1348	2.1386	2.1318	2.1378	2.1313	2.1307	2.156	2.1323	2.1324	2.1335	2.1423	2.1457	2.1266	2.1345	2.1419	2.1297	2.1496	2.1548	2.1423	2.1331	2.13799	0.00812018
	a507	2.1358	2.1457	2.1334	2.1366	2.1549	2.1462	2.1398	2.1327	2.1576	2.1501	2.1213	2.1164	2.1547	2.1391	2.1201	2.1435	2.1321	2.1324	2.1353	2.1437	2.13857	0.0111303
	a508	2.155	2.1259	2.1251	2.1492	2.1309	2.1424	2.1342	2.1407	2.1354	2.1315	2.1473	2.1412	2.1261	2.1453	2.1479	2.1289	2.1309	2.1245	2.1436	2.143	2.13745	0.00900886
	a509	2.1468	2.1325	2.1377	2.151	2.1247	2.1278	2.1265	2.1378	2.1356	2.1278	2.1463	2.1328	2.138	2.1254	2.1167	2.1365	2.1278	2.1465	2.1326	2.1511	2.13509	0.00927014
	a510	2.1706	2.1604	2.1207	2.1569	2.158	2.15	2.1377	2.1257	2.1484	2.1383	2.1392	2.1334	2.1562	2.1419	2.1612	2.1272	2.1468	2.1515	2.1588	2.1269	2.14549	0.0136787
	a511	2.1604	2.1536	2.141	2.1452	2.1734	2.142	2.1479	2.1468	2.1488	2.1366	2.1504	2.1452	2.1462	2.1418	2.155	2.145	2.1467	2.1438	2.1447	2.156	2.14853	0.0079283
	a512	2.1266	2.1482	2.1314	2.1416	2.1379	2.1485	2.1308	2.1566	2.1466	2.125	2.1353	2.1567	2.12	2.1232	2.1203	2.1052	2.1416	2.126	2.1304	2.116	2.1334	0.0134263
	a513	2.1568	2.1381	2.1268	2.1511	2.1254	2.1457	2.1309	2.1412	2.1505	2.1546	2.1468	2.1462	2.1542	2.1387	2.1534	2.1792	2.1488	2.1558	2.1363	2.1566	2.14685	0.0120775
LHCⅡ M1'	b601	2.2667	2.2612	2.2652	2.2728	2.2601	2.2659	2.2684	2.2566	2.2447	2.2638	2.269	2.2719	2.2485	2.2758	2.2747	2.2461	2.2685	2.2742	2.2211	2.2678	2.26215	0.0129845
	a602	2.1656	2.1536	2.1751	2.1585	2.1609	2.1705	2.1821	2.1784	2.1675	2.1544	2.1686	2.1649	2.1773	2.1619	2.1662	2.1726	2.1764	2.1644	2.1793	2.1715	2.16848	0.00799827
	a603	2.1609	2.1764	2.147	2.1701	2.1386	2.1631	2.1427	2.1624	2.1883	2.1471	2.1458	2.1513	2.1535	2.161	2.1518	2.1427	2.1708	2.138	2.1265	2.1428	2.15404	0.0146221
	a604	2.1235	2.1097	2.1157	2.0909	2.1039	2.1254	2.1179	2.1237	2.1041	2.1089	2.1261	2.1211	2.0979	2.0975	2.0911	2.0928	2.1182	2.144	2.1002	2.0976	2.11051	0.0140465
	b605	2.2554	2.2491	2.248	2.2468	2.2653	2.2695	2.2762	2.2659	2.2538	2.2568	2.2587	2.2804	2.256	2.2578	2.2543	2.2271	2.2529	2.258	2.2726	2.2549	2.25797	0.0114744
	b606	2.2485	2.2565	2.2684	2.233	2.2633	2.2552	2.2508	2.2606	2.2468	2.2237	2.2349	2.2633	2.2687	2.2527	2.2648	2.2375	2.2582	2.2357	2.2521	2.2606	2.25177	0.0125584
	b607	2.2307	2.2404	2.2177	2.2351	2.2217	2.2144	2.2325	2.2337	2.1877	2.2288	2.2144	2.1931	2.2142	2.2083	2.2291	2.2247	2.229	2.1934	2.2099	2.2196	2.21892	0.0144234
	b608	2.2442	2.2651	2.2612	2.2354	2.2514	2.2571	2.2603	2.2555	2.2521	2.2628	2.258	2.2433	2.2728	2.2457	2.2426	2.2452	2.2552	2.2654	2.2711	2.2479	2.25461	0.00992493
	b609	2.2321	2.284	2.218	2.2728	2.2542	2.2814	2.2428	2.2642	2.2402	2.2693	2.2683	2.2988	2.2554	2.2822	2.2536	2.2941	2.248	2.2776	2.2631	2.2608	2.26305	0.0201699
	a610	2.1451	2.1274	2.1268	2.1183	2.1324	2.1311	2.117	2.1295	2.1257	2.1404	2.1342	2.1246	2.1375	2.1344	2.1328	2.1427	2.1421	2.1121	2.1584	2.1471	2.13298	0.0108731
	a611	2.1169	2.1222	2.1292	2.1306	2.1434	2.1294	2.1022	2.1607	2.1126	2.1493	2.1613	2.1191	2.1555	2.1395	2.1248	2.1383	2.1232	2.1311	2.1282	2.1298	2.13236	0.0152934
	a612	2.1662	2.1763	2.153	2.1827	2.177	2.1953	2.1752	2.2028	2.1803	2.1921	2.1872	2.191	2.1694	2.1756	2.1948	2.1811	2.1956	2.1757	2.1786	2.1768	2.18133	0.0114806
	a613	2.1292	2.1105	2.0924	2.1061	2.1077	2.0735	2.1049	2.1041	2.1156	2.1329	2.0962	2.1426	2.1136	2.1212	2.1131	2.09	2.1023	2.1018	2.1238	2.0889	2.10852	0.0160742
	a614	2.1423	2.148	2.1349	2.1505	2.1289	2.1273	2.1295	2.1237	2.138	2.1447	2.1248	2.1344	2.1182	2.1318	2.1368	2.1333	2.1415	2.1124	2.1347	2.1314	2.13336	0.00931405
LHCⅡ M2'	b601	2.2611	2.2515	2.2569	2.264	2.2784	2.2788	2.2783	2.2901	2.2579	2.2756	2.2686	2.2829	2.2848	2.2578	2.27	2.2682	2.267	2.2602	2.2671	2.2586	2.26889	0.0104547
	a602	2.1771	2.1509	2.1863	2.1559	2.1458	2.1677	2.2093	2.1746	2.1498	2.2	2.1788	2.2016	2.1504	2.1791	2.1645	2.1753	2.1839	2.1955	2.1955	2.1629	2.17524	0.0186274
	a603	2.1548	2.1647	2.1738	2.1672	2.1368	2.1568	2.1525	2.1483	2.1632	2.1638	2.1626	2.1545	2.168	2.1604	2.1585	2.1616	2.1435	2.1493	2.1582	2.1374	2.15679	0.00964103
	a604	2.1379	2.1382	2.1368	2.1618	2.1435	2.1421	2.1278	2.1338	2.1419	2.1266	2.1282	2.096	2.1323	2.1103	2.1442	2.1231	2.1309	2.1334	2.1089	2.1182	2.13079	0.0142729
	b605	2.2462	2.2591	2.2379	2.2358	2.2195	2.2416	2.2222	2.255	2.2541	2.2331	2.2582	2.246	2.2538	2.2471	2.2318	2.2435	2.2613	2.2587	2.2366	2.268	2.24547	0.0128907
	b606	2.2535	2.2417	2.2421	2.2646	2.2522	2.2716	2.2656	2.2718	2.2567	2.2562	2.2502	2.2509	2.2682	2.2595	2.2554	2.2557	2.229	2.2324	2.2764	2.263	2.25583	0.0123487
	b607	2.213	2.2167	2.227	2.2207	2.2245	2.2043	2.2059	2.2399	2.2353	2.1781	2.1964	2.1847	2.221	2.2125	2.2125	2.2161	2.2079	2.1991	2.2007	2.2015	2.21089	0.0150508
	b608	2.2384	2.2125	2.2304	2.2357	2.2376	2.2316	2.2621	2.2408	2.2303	2.2608	2.2289	2.2577	2.2306	2.2488	2.2355	2.2376	2.2473	2.2611	2.2547	2.2247	2.24036	0.0132967
	b609	2.2592	2.267	2.2726	2.2792	2.2808	2.219	2.2663	2.2234	2.285	2.246	2.2688	2.2731	2.27	2.26	2.2682	2.2507	2.2377	2.2325	2.2456	2.2476	2.25763	0.0185695
	a610	2.1496	2.1323	2.13	2.165	2.1219	2.1507	2.1384	2.1504	2.1366	2.1371	2.123	2.1664	2.146	2.1614	2.1417	2.1459	2.1961	2.1375	2.1454	2.1848	2.14801	0.0185382
	a611	2.1551	2.1534	2.1459	2.1268	2.1516	2.1014	2.1265	2.1404	2.1114	2.1395	2.1462	2.1361	2.1272	2.1223	2.1283	2.1255	2.1405	2.1381	2.1336	2.1206	2.13352	0.0136034
	a612	2.1974	2.1825	2.1674	2.1745	2.1729	2.173	2.1669	2.1717	2.1812	2.1654	2.1626	2.1448	2.1706	2.1602	2.1625	2.1726	2.1519	2.172	2.1696	2.1691	2.16944	0.0106912
	a613	2.1376	2.1356	2.1424	2.1502	2.1612	2.1479	2.1456	2.1634	2.1809	2.1516	2.1244	2.1423	2.1599	2.1409	2.1719	2.1469	2.1379	2.1568	2.1581	2.1669	2.15112	0.0134323
	a614	2.1511	2.1385	2.1102	2.1172	2.1116	2.1329	2.1301	2.118	2.1386	2.1325	2.1507	2.123	2.1022	2.1298	2.1292	2.1322	2.1247	2.1196	2.1185	2.1158	2.12632	0.0124492
LHCⅡ M3'	b601	2.2606	2.277	2.2658	2.2823	2.2684	2.2532	2.2731	2.2376	2.275	2.2826	2.2652	2.2662	2.264	2.2853	2.2608	2.2405	2.2303	2.2692	2.2797	2.2625	2.26496	0.0146914
	a602	2.1501	2.1833	2.1798	2.1513	2.1692	2.1314	2.1464	2.1599	2.1467	2.1439	2.1523	2.1337	2.1455	2.1319	2.163	2.1681	2.1424	2.153	2.166	2.1491	2.15335	0.0142949
	a603	2.1376	2.1228	2.0946	2.1106	2.1007	2.1299	2.1219	2.1381	2.141	2.1324	2.1303	2.1257	2.1199	2.1406	2.1137	2.1474	2.1335	2.1379	2.1178	2.1273	2.12619	0.0134103
	a604	2.1403	2.1709	2.1607	2.1651	2.1558	2.1481	2.1572	2.157	2.1366	2.1415	2.1415	2.1614	2.1402	2.1538	2.1546	2.1395	2.135	2.1248	2.1471	2.1615	2.14963	0.0116305
	b605	2.2685	2.2553	2.2612	2.2684	2.2625	2.2745	2.2984	2.263	2.2757	2.2589	2.2576	2.2481	2.2642	2.2342	2.2549	2.2132	2.2297	2.2383	2.2485	2.2715	2.25733	0.0182646
	b606	2.2248	2.2253	2.2323	2.2402	2.2503	2.2434	2.2319	2.2373	2.2626	2.2372	2.2355	2.2666	2.2684	2.268	2.2525	2.2359	2.2498	2.2834	2.2495	2.2361	2.24655	0.0157068
	b607	2.2029	2.211	2.2421	2.2351	2.1895	2.2348	2.2066	2.2358	2.2406	2.2721	2.2477	2.2206	2.2603	2.2414	2.2213	2.2136	2.2468	2.2485	2.2388	2.2455	2.23275	0.019978
	b608	2.2637	2.2599	2.2494	2.2868	2.2627	2.2624	2.2809	2.2519	2.2694	2.2702	2.2449	2.2587	2.2707	2.2482	2.2592	2.2738	2.2734	2.259	2.2584	2.2442	2.26239	0.011281
	b609	2.2676	2.2662	2.2499	2.254	2.2592	2.2696	2.2292	2.2481	2.2288	2.26	2.2621	2.2337	2.2421	2.2344	2.2608	2.2436	2.2969	2.2335	2.2621	2.2035	2.25026	0.019618
	a610	2.1557	2.1497	2.1606	2.1577	2.1549	2.1647	2.1683	2.1221	2.1355	2.1606	2.1441	2.1506	2.1358	2.1361	2.1794	2.1459	2.1345	2.1495	2.1666	2.1521	2.15122	0.0135686
	a611	2.141	2.1519	2.1463	2.1683	2.1504	2.1712	2.1512	2.1489	2.1599	2.1411	2.1335	2.1515	2.1573	2.1395	2.1286	2.1458	2.1544	2.156	2.1611	2.1506	2.15042	0.0103721
	a612	2.1654	2.1523	2.1555	2.1447	2.1702	2.1476	2.1596	2.1543	2.1632	2.1677	2.1573	2.152	2.1494	2.1466	2.1633	2.1634	2.1521	2.1279	2.178	2.1543	2.15624	0.0106184
	a613	2.1385	2.1196	2.1397	2.1442	2.1378	2.1748	2.1215	2.1317	2.1487	2.1374	2.1516	2.135	2.1677	2.1176	2.1679	2.1204	2.1434	2.134	2.1442	2.1488	2.14122	0.0155715
	a614	2.1099	2.1037	2.0951	2.1292	2.1443	2.1277	2.1141	2.1349	2.1298	2.1156	2.1379	2.1292	2.1168	2.1417	2.1271	2.1051	2.1312	2.1222	2.1121	2.0996	2.12136	0.013829
CP29'	a601	2.134	2.1089	2.1196	2.1274	2.1548	2.1412	2.1317	2.1459	2.1591	2.1295	2.1007	2.1633	2.1255	2.1176	2.1335	2.1477	2.1103	2.138	2.1351	2.1457	2.13347	0.016385
	a602	2.18	2.1386	2.1242	2.1627	2.1332	2.1249	2.1297	2.1336	2.1498	2.1231	2.1429	2.1405	2.1685	2.1655	2.1273	2.1694	2.1557	2.1239	2.1406	2.1433	2.14387	0.0171523
	a603	2.1391	2.151	2.1344	2.1348	2.1261	2.1189	2.1411	2.1502	2.1315	2.1356	2.1279	2.1227	2.1131	2.1522	2.1253	2.1398	2.1349	2.141	2.1279	2.1383	2.13429	0.0101833
	a604	2.1432	2.1489	2.1172	2.1305	2.1203	2.1246	2.1116	2.1169	2.1508	2.1346	2.1096	2.1328	2.1477	2.1499	2.1298	2.14	2.1642	2.1459	2.1302	2.1058	2.13272	0.0156136
	b606	2.1986	2.2357	2.2742	2.2435	2.2266	2.2564	2.2288	2.2524	2.2304	2.2433	2.2612	2.2271	2.2685	2.232	2.2168	2.2665	2.2398	2.2038	2.1875	2.2117	2.23524	0.0233368
	b607	2.2707	2.2384	2.2789	2.2718	2.2813	2.2442	2.2546	2.2815	2.1984	2.255	2.2581	2.2764	2.2397	2.2716	2.2796	2.2817	2.2712	2.2872	2.2481	2.2875	2.2638	0.0214955
	b608	2.2311	2.276	2.258	2.2209	2.2358	2.2335	2.2246	2.2614	2.2182	2.2623	2.2374	2.2501	2.2435	2.2421	2.2323	2.2146	2.2358	2.2463	2.2001	2.255	2.23895	0.0179913
	a609	2.1423	2.1468	2.1112	2.1173	2.114	2.1409	2.1576	2.1542	2.1373	2.1749	2.1409	2.1161	2.1548	2.0999	2.1368	2.1238	2.1404	2.091	2.1571	2.1143	2.13358	0.0212265
	a610	2.1562	2.1259	2.1486	2.1525	2.1568	2.1307	2.1502	2.1443	2.1319	2.1119	2.1303	2.1562	2.1227	2.134	2.1365	2.1247	2.1196	2.1621	2.1279	2.1105	2.13667	0.0152909
	a611	2.1417	2.1579	2.1508	2.1855	2.137	2.1361	2.1574	2.1411	2.1404	2.141	2.1574	2.1398	2.1635	2.1384	2.1475	2.1453	2.16	2.1608	2.1595	2.1159	2.14885	0.0141576
	a612	2.1339	2.1494	2.1496	2.15	2.1254	2.1331	2.1368	2.1287	2.1446	2.1389	2.1359	2.1615	2.1483	2.1237	2.1402	2.1448	2.1493	2.1446	2.1713	2.1353	2.14226	0.011363
	a613	2.1278	2.1642	2.1417	2.1548	2.1456	2.1456	2.1379	2.1291	2.1146	2.0937	2.1492	2.151	2.1449	2.1501	2.1415	2.1196	2.1369	2.1592	2.1328	2.1366	2.13884	0.0159625
	a616	2.1622	2.1734	2.1721	2.1437	2.1359	2.1696	2.1716	2.1647	2.1454	2.1536	2.1717	2.163	2.1827	2.1426	2.1619	2.1516	2.1501	2.1735	2.1689	2.154	2.16061	0.0124627
CP26'	b601	2.2674	2.2825	2.2767	2.235	2.2605	2.2358	2.2392	2.2261	2.2296	2.2713	2.2848	2.2626	2.2828	2.2863	2.2703	2.2403	2.2016	2.2542	2.2523	2.246	2.25527	0.0226529
	a602	2.1891	2.1749	2.1625	2.1694	2.1455	2.1306	2.1229	2.1588	2.1498	2.175	2.1721	2.1504	2.1321	2.1589	2.1444	2.1681	2.1405	2.1631	2.1534	2.1636	2.15626	0.0164893
	a603	2.1547	2.154	2.1647	2.1485	2.1669	2.1636	2.1649	2.1911	2.1614	2.1519	2.1236	2.1592	2.1455	2.1442	2.1755	2.1472	2.1358	2.1491	2.1486	2.1336	2.1542	0.0148087
	a604	2.1374	2.1381	2.1507	2.1428	2.1574	2.1568	2.1437	2.1376	2.138	2.1475	2.1482	2.1672	2.1428	2.1555	2.1508	2.1537	2.1669	2.1625	2.1438	2.1277	2.14845	0.0103023
	b606	2.205	2.1999	2.2194	2.2127	2.2288	2.2284	2.2202	2.1941	2.2375	2.224	2.2116	2.2034	2.2387	2.2354	2.2371	2.2418	2.2034	2.2226	2.2655	2.2643	2.22469	0.0192348
	b607	2.2538	2.2778	2.2235	2.2509	2.2675	2.2704	2.2351	2.2464	2.2795	2.2365	2.2288	2.2378	2.2713	2.2227	2.2639	2.2483	2.2896	2.2587	2.2495	2.2304	2.25212	0.0192769
	b608	2.2804	2.2612	2.2149	2.2365	2.243	2.2761	2.2348	2.2345	2.2632	2.2527	2.2704	2.2829	2.2436	2.2748	2.2791	2.2499	2.2601	2.2736	2.2422	2.2747	2.25743	0.018807
	a609	2.136	2.1263	2.1187	2.1126	2.1396	2.1564	2.1264	2.1226	2.1137	2.1384	2.1263	2.1202	2.1278	2.1074	2.1533	2.127	2.1521	2.1418	2.1527	2.1215	2.13104	0.0142197
	a610	2.1896	2.1743	2.1566	2.1543	2.1446	2.1552	2.1657	2.1192	2.131	2.1577	2.1721	2.1518	2.1558	2.1666	2.18	2.1319	2.0976	2.1265	2.1439	2.1918	2.15331	0.0232208
	a611	2.1575	2.1545	2.1472	2.1272	2.1444	2.1514	2.1368	2.1338	2.1684	2.1293	2.1284	2.1352	2.1458	2.1557	2.1527	2.1608	2.1363	2.1185	2.1324	2.1277	2.1422	0.013174
	a612	2.1828	2.1609	2.1706	2.1625	2.1767	2.1904	2.1605	2.1377	2.16	2.1773	2.1632	2.1823	2.1821	2.1737	2.1573	2.1778	2.1768	2.1618	2.1894	2.1755	2.17096	0.0125147
	a613	2.151	2.1576	2.1249	2.1095	2.1566	2.1122	2.1187	2.1273	2.1317	2.1238	2.1377	2.1542	2.116	2.1324	2.1253	2.1144	2.1326	2.1088	2.1231	2.1433	2.13006	0.0152357
	a614	2.1165	2.1166	2.1321	2.1348	2.1196	2.1088	2.1443	2.1177	2.1172	2.1411	2.1287	2.1187	2.1524	2.135	2.1297	2.1237	2.1383	2.1309	2.1338	2.1301	2.1285	0.0107814
CP47'	a602	2.1502	2.144	2.148	2.1703	2.1576	2.1474	2.1568	2.1288	2.1644	2.1471	2.1347	2.1362	2.1229	2.1372	2.1378	2.1338	2.136	2.1562	2.1582	2.1417	2.14547	0.012086
	a603	2.1396	2.1648	2.1371	2.1433	2.1619	2.1629	2.1558	2.1549	2.1478	2.1461	2.1448	2.1607	2.1445	2.1596	2.1768	2.1381	2.1566	2.1482	2.1441	2.1452	2.15164	0.0102442
	a604	2.1403	2.1279	2.1317	2.1323	2.1558	2.1368	2.1242	2.1312	2.1423	2.1442	2.1497	2.1467	2.1394	2.1312	2.1571	2.1508	2.1387	2.1395	2.1439	2.1297	2.13967	0.00903178
	a605	2.1349	2.1368	2.1545	2.1481	2.1377	2.1466	2.1538	2.1432	2.1526	2.1539	2.1394	2.1622	2.1396	2.1306	2.1283	2.1343	2.1494	2.156	2.1467	2.1435	2.14461	0.00906115
	a606	2.0941	2.1379	2.1173	2.1292	2.1305	2.1413	2.1289	2.1389	2.1263	2.1227	2.1348	2.1338	2.1094	2.1464	2.1344	2.0998	2.1196	2.1188	2.096	2.1411	2.12506	0.014959
	a607	2.1305	2.1195	2.1113	2.1115	2.1068	2.1311	2.1249	2.103	2.1171	2.1269	2.1038	2.1216	2.139	2.1269	2.1063	2.097	2.1054	2.0915	2.1227	2.1335	2.11652	0.0128204
	a608	2.1368	2.1358	2.1409	2.116	2.1354	2.1165	2.1224	2.1247	2.1193	2.1231	2.1143	2.1213	2.1353	2.1156	2.1255	2.1203	2.1117	2.1214	2.0957	2.1258	2.12289	0.0102907
	a609	2.1188	2.1309	2.1429	2.1452	2.1401	2.1597	2.1256	2.146	2.1597	2.1292	2.1193	2.1515	2.1556	2.1158	2.1364	2.1264	2.138	2.1454	2.1584	2.1641	2.14045	0.0145603
	a610	2.1262	2.1304	2.1274	2.1293	2.1187	2.0979	2.1128	2.1243	2.0813	2.098	2.1129	2.1098	2.1186	2.0957	2.1449	2.1122	2.1235	2.0934	2.1148	2.0898	2.11309	0.0157528
	a611	2.1478	2.1126	2.1252	2.1157	2.1295	2.1272	2.1336	2.1222	2.1125	2.14	2.1301	2.1084	2.1181	2.0999	2.1095	2.1255	2.1381	2.1246	2.1448	2.1219	2.12436	0.012315
	a612	2.149	2.1572	2.1345	2.1477	2.1465	2.1542	2.1393	2.1518	2.1409	2.1319	2.1702	2.1569	2.1361	2.1613	2.1548	2.141	2.1497	2.1471	2.1424	2.1273	2.14699	0.0103377
	a613	2.1475	2.1347	2.124	2.1318	2.1369	2.125	2.1487	2.1452	2.1729	2.1465	2.1462	2.1338	2.1333	2.1496	2.1445	2.1296	2.14	2.1308	2.1513	2.1495	2.14109	0.0111596
	a614	2.0991	2.1088	2.1508	2.1324	2.1318	2.1419	2.1187	2.115	2.1205	2.115	2.1453	2.1232	2.1058	2.1342	2.1258	2.125	2.1367	2.1244	2.1065	2.1282	2.12445	0.0134136
	a615	2.1401	2.1214	2.1219	2.1422	2.1195	2.137	2.1366	2.1296	2.122	2.1398	2.1327	2.1394	2.1113	2.1428	2.1325	2.1383	2.1286	2.129	2.1372	2.1265	2.13142	0.00855708
	a616	2.1557	2.1485	2.1692	2.196	2.1878	2.1872	2.1805	2.167	2.1754	2.1775	2.1588	2.1627	2.1928	2.1501	2.1619	2.1735	2.1275	2.1596	2.1545	2.1473	2.16667	0.0170029
	a617	2.1447	2.1332	2.1253	2.1272	2.1238	2.1467	2.1025	2.1081	2.1349	2.0953	2.1406	2.1301	2.1133	2.1351	2.1129	2.1043	2.1047	2.1159	2.1003	2.1147	2.12068	0.0152078
CP43'	a502	2.1574	2.122	2.1722	2.1795	2.1673	2.1653	2.1423	2.1552	2.155	2.1632	2.1702	2.1478	2.1526	2.1434	2.1421	2.1643	2.1553	2.1566	2.1572	2.1647	2.15668	0.0126452
	a503	2.1212	2.1189	2.1164	2.1386	2.122	2.1266	2.1452	2.1353	2.1232	2.1228	2.1224	2.152	2.1177	2.1291	2.1301	2.136	2.1279	2.1173	2.1285	2.1377	2.12845	0.0094897
	a501	2.1333	2.1252	2.1206	2.1179	2.11	2.1283	2.1134	2.0915	2.1451	2.1307	2.1285	2.1504	2.124	2.1158	2.1199	2.1308	2.0997	2.1131	2.1224	2.1144	2.12175	0.013342
	a504	2.1516	2.1461	2.1775	2.1451	2.1445	2.1511	2.1359	2.1656	2.1364	2.1569	2.1339	2.1478	2.156	2.1299	2.1484	2.1512	2.1504	2.1584	2.1495	2.1689	2.15026	0.0114873
	a505	2.1297	2.1177	2.114	2.1288	2.0951	2.1202	2.1317	2.1048	2.1082	2.1143	2.1326	2.114	2.13	2.0903	2.0961	2.1132	2.1326	2.1042	2.1154	2.1014	2.11472	0.0130072
	a506	2.1449	2.1343	2.1338	2.1404	2.132	2.1447	2.1359	2.1641	2.1337	2.1517	2.1615	2.1496	2.1382	2.1308	2.1208	2.1328	2.1412	2.1386	2.1561	2.1559	2.14205	0.0110669
	a507	2.1149	2.1188	2.1243	2.1262	2.1398	2.1253	2.1155	2.1199	2.1248	2.1297	2.1127	2.1293	2.0985	2.1245	2.1352	2.1498	2.1399	2.1293	2.1462	2.1153	2.126	0.0119488
	a508	2.1678	2.1656	2.1274	2.1666	2.1627	2.1391	2.1536	2.1367	2.1362	2.1193	2.1309	2.1362	2.1392	2.1382	2.1558	2.1464	2.1501	2.1357	2.135	2.1352	2.14389	0.0136158
	a509	2.1232	2.1427	2.1432	2.1402	2.1616	2.145	2.1641	2.1385	2.122	2.1393	2.1552	2.1373	2.1093	2.1549	2.1586	2.1482	2.1487	2.1311	2.146	2.1374	2.14233	0.0134248
	a510	2.1418	2.1227	2.1431	2.1337	2.1406	2.136	2.1211	2.1337	2.1378	2.128	2.1186	2.144	2.1237	2.1301	2.133	2.1298	2.1302	2.1445	2.141	2.1345	2.13339	0.00768
	a511	2.1631	2.1374	2.1454	2.1314	2.1305	2.1449	2.1546	2.1404	2.1261	2.147	2.1449	2.1512	2.1477	2.1367	2.1362	2.1502	2.1533	2.1512	2.1431	2.1506	2.1443	0.00896312
	a512	2.1471	2.1412	2.1443	2.1472	2.133	2.1394	2.1248	2.1283	2.1413	2.1318	2.1308	2.1453	2.1417	2.1552	2.1303	2.1434	2.142	2.1446	2.1373	2.1554	2.14022	0.00815277
	a513	2.1548	2.1677	2.1546	2.1686	2.1637	2.177	2.1585	2.1642	2.1624	2.1603	2.1704	2.1667	2.1674	2.1575	2.1664	2.1837	2.1761	2.1752	2.1655	2.1617	2.16612	0.00744611
RC	a405	2.1724	2.1817	2.1721	2.1752	2.1698	2.1658	2.1705	2.1735	2.1808	2.171	2.1781	2.1721	2.1724	2.1758	2.1762	2.1735	2.1723	2.1789	2.1819	2.1864	2.17502	0.0048636
	a406	2.1257	2.1002	2.1297	2.1134	2.1293	2.1117	2.1197	2.1136	2.1201	2.102	2.1172	2.147	2.1367	2.132	2.1057	2.1091	2.1102	2.1023	2.1327	2.1067	2.11825	0.0127513
	a407	2.1192	2.1368	2.1295	2.1226	2.135	2.1396	2.1356	2.1373	2.1419	2.0964	2.1098	2.0922	2.0938	2.0914	2.1138	2.1018	2.0957	2.092	2.0976	2.0922	2.11371	0.0189434
	a410	2.1238	2.1389	2.1442	2.1387	2.1546	2.1199	2.1101	2.1488	2.112	2.1401	2.1418	2.1309	2.1484	2.149	2.1529	2.1264	2.1476	2.1191	2.1422	2.1362	2.13628	0.0131941
	a402	2.1195	2.1273	2.1457	2.1447	2.1397	2.1397	2.1296	2.1495	2.1536	2.1532	2.1626	2.1501	2.1561	2.1421	2.1496	2.1679	2.162	2.1694	2.1455	2.1448	2.14763	0.0126059
	a403	2.1363	2.1175	2.1271	2.1622	2.1359	2.1643	2.1387	2.1622	2.1522	2.1589	2.154	2.1392	2.1347	2.1646	2.1666	2.1786	2.1794	2.1713	2.1833	2.1676	2.15473	0.018226
RC'	a405	2.1733	2.1535	2.176	2.168	2.1731	2.1588	2.1832	2.1652	2.1782	2.1596	2.1685	2.1733	2.1741	2.1714	2.1642	2.1652	2.1663	2.1707	2.1728	2.1643	2.16898	0.00690422
	a406	2.1067	2.0983	2.1118	2.1132	2.1154	2.102	2.09	2.0859	2.1021	2.0984	2.1045	2.1021	2.133	2.1063	2.1234	2.1046	2.1067	2.1219	2.1329	2.1056	2.10824	0.0120636
	a407	2.1353	2.1419	2.1291	2.1106	2.0966	2.1423	2.111	2.1079	2.1503	2.1377	2.1222	2.1119	2.1331	2.1306	2.1428	2.121	2.1283	2.1173	2.1227	2.1282	2.12604	0.0135736
	a410	2.162	2.1467	2.1454	2.1374	2.1469	2.1243	2.1356	2.1509	2.1355	2.1409	2.1384	2.1128	2.1313	2.1371	2.1503	2.1552	2.1316	2.1418	2.151	2.1391	2.14071	0.0108796
	a402	2.1627	2.1754	2.1462	2.1828	2.1533	2.1701	2.12	2.1945	2.1687	2.1759	2.1754	2.1618	2.1479	2.1367	2.183	2.1829	2.1817	2.1589	2.1481	2.161	2.16435	0.017944
	a403	2.1594	2.1825	2.1614	2.1527	2.1704	2.1658	2.1364	2.1495	2.151	2.1505	2.1431	2.1638	2.1792	2.1887	2.1534	2.1447	2.144	2.1038	2.1454	2.1785	2.15621	0.0187012

## Sheet: Table DS2
Table S2 Site Energies of PSII-LHCII Pigment Molecules Calculated by QM.
Subunit	Pigment	Site energy of frame 1(eV)	Site energy of frame 2(eV)	Site energy of frame 3(eV)	Site energy of frame 4(eV)	Site energy of frame 5(eV)	Site energy of frame 6(eV)	Site energy of frame 7(eV)	Site energy of frame 8(eV)	Site energy of frame 9(eV)	Site energy of frame 10(eV)	Site energy of frame 11(eV)	Site energy of frame 12(eV)	Site energy of frame 13(eV)	Site energy of frame 14(eV)	Site energy of frame 15(eV)	Site energy of frame 16(eV)	Site energy of frame 17(eV)	Site energy of frame 18(eV)	Site energy of frame 19(eV)	Site energy of frame 20(eV)	Average Site energy(eV)	SD
LHCⅡ M1	b601	2.2681	2.283	2.2504	2.2754	2.2637	2.2193	2.2776	2.2798	2.2682	2.2583	2.2729	2.2519	2.262	2.268	2.2497	2.2815	2.2837	2.2268	2.2358	2.2706	2.26233	0.0180101
	a602	2.1296	2.1399	2.1245	2.1602	2.1506	2.143	2.1506	2.1163	2.1587	2.1429	2.1263	2.1432	2.1469	2.1103	2.1607	2.1245	2.1365	2.1267	2.1287	2.1259	2.1373	0.0142762
	a603	2.1489	2.1608	2.1573	2.1482	2.1478	2.1393	2.1328	2.129	2.1384	2.1286	2.1447	2.1345	2.1539	2.1453	2.1535	2.1582	2.1718	2.147	2.149	2.1497	2.14694	0.010737
	a604	2.1583	2.1236	2.1419	2.1663	2.1366	2.1239	2.1309	2.1531	2.1419	2.145	2.1466	2.1355	2.1259	2.1238	2.1196	2.135	2.1287	2.1403	2.1428	2.1435	2.13816	0.0120402
	b605	2.2315	2.2398	2.2517	2.2361	2.2462	2.2368	2.1984	2.227	2.2105	2.2275	2.2361	2.2509	2.2282	2.2189	2.2451	2.2378	2.2272	2.2336	2.2173	2.242	2.23213	0.0131031
	b606	2.2459	2.2716	2.272	2.2657	2.2692	2.2355	2.2577	2.2383	2.2916	2.2754	2.2664	2.2535	2.2668	2.2636	2.2445	2.2592	2.2751	2.2907	2.2726	2.2674	2.26414	0.0147173
	b607	2.2708	2.2034	2.2472	2.2584	2.2377	2.2247	2.245	2.245	2.2341	2.2326	2.2536	2.2414	2.2235	2.2393	2.2385	2.239	2.2506	2.2286	2.2664	2.2475	2.24137	0.0149645
	b608	2.2663	2.2824	2.2652	2.2764	2.2722	2.2678	2.2603	2.2798	2.2637	2.265	2.2624	2.2676	2.2808	2.286	2.2659	2.2761	2.28	2.2804	2.2715	2.262	2.27159	0.0077781
	b609	2.251	2.2568	2.2616	2.26	2.2458	2.2605	2.2003	2.2587	2.2399	2.2555	2.2562	2.2612	2.2488	2.2564	2.2636	2.2541	2.255	2.2567	2.2562	2.2626	2.25304	0.0133743
	a610	2.135	2.1324	2.1379	2.152	2.1635	2.1424	2.1404	2.1471	2.1306	2.1328	2.1614	2.1436	2.1473	2.1609	2.1542	2.1141	2.1382	2.1695	2.1644	2.1444	2.14561	0.0135523
	a611	2.132	2.1265	2.1545	2.1442	2.1211	2.1435	2.1313	2.1428	2.1254	2.1248	2.1207	2.1292	2.1368	2.1325	2.1302	2.1247	2.1236	2.1172	2.1252	2.1289	2.13075	0.00916169
	a612	2.1443	2.1396	2.1326	2.1389	2.1305	2.1432	2.1401	2.1528	2.139	2.1369	2.1436	2.1258	2.1406	2.1604	2.155	2.1589	2.1476	2.1601	2.1489	2.1388	2.14388	0.00949798
	a613	2.1623	2.1641	2.1639	2.1631	2.1716	2.2061	2.1535	2.1439	2.1635	2.1659	2.1417	2.1415	2.1523	2.1564	2.1356	2.1337	2.148	2.1395	2.1493	2.1621	2.1559	0.0158723
	a614	2.1258	2.1385	2.149	2.125	2.1264	2.1464	2.1307	2.1324	2.1175	2.1398	2.1393	2.1265	2.1616	2.1353	2.1287	2.1381	2.1281	2.1378	2.1205	2.1327	2.13401	0.0101248
LHCⅡ M2	b601	2.2748	2.2633	2.2617	2.2784	2.2293	2.247	2.2616	2.2443	2.2407	2.2471	2.2413	2.2633	2.2303	2.2385	2.2427	2.2345	2.2534	2.2653	2.2355	2.2122	2.24826	0.0163179
	a602	2.146	2.1444	2.1276	2.1748	2.1426	2.1551	2.1792	2.1637	2.1587	2.1779	2.1467	2.1446	2.1368	2.1736	2.1916	2.1999	2.1993	2.1885	2.1772	2.1459	2.1637	0.021265
	a603	2.1403	2.1271	2.1358	2.1606	2.1312	2.1463	2.1382	2.1734	2.1336	2.1193	2.1507	2.1323	2.1616	2.1397	2.1489	2.1335	2.1458	2.125	2.1289	2.1373	2.14048	0.0131537
	a604	2.138	2.1372	2.1235	2.1557	2.1259	2.1456	2.1336	2.1474	2.1439	2.1484	2.1612	2.1515	2.1148	2.1316	2.1277	2.1109	2.1308	2.141	2.1485	2.1318	2.13745	0.0128894
	b605	2.2622	2.2637	2.2303	2.2515	2.2659	2.2328	2.2602	2.2273	2.2436	2.2325	2.2271	2.2642	2.2564	2.2494	2.257	2.2561	2.2605	2.2532	2.2216	2.2533	2.24844	0.0141154
	b606	2.2529	2.2477	2.2579	2.2508	2.2314	2.2504	2.2707	2.2539	2.2639	2.2443	2.2418	2.2593	2.2569	2.2487	2.2414	2.2528	2.242	2.2397	2.2467	2.2631	2.25081	0.00926392
	b607	2.2477	2.236	2.2411	2.2578	2.2548	2.268	2.2616	2.2405	2.2226	2.2783	2.2704	2.2314	2.2186	2.2584	2.2608	2.2463	2.1898	2.2506	2.199	2.2521	2.24429	0.0223512
	b608	2.2706	2.2543	2.2654	2.2503	2.2598	2.2659	2.2334	2.2589	2.2665	2.2576	2.2651	2.2506	2.2618	2.2638	2.2769	2.2453	2.2564	2.2618	2.2459	2.2448	2.25775	0.0100964
	b609	2.2304	2.2348	2.2251	2.2456	2.2331	2.2578	2.2258	2.2466	2.1825	2.2704	2.2768	2.2564	2.2231	2.2602	2.2311	2.216	2.2592	2.2661	2.2277	2.2544	2.24116	0.0218707
	a610	2.1284	2.1992	2.1821	2.1652	2.1277	2.1242	2.1436	2.1749	2.1539	2.153	2.1371	2.1245	2.1347	2.1494	2.1275	2.1154	2.1287	2.1353	2.1414	2.1805	2.14634	0.0225351
	a611	2.1151	2.1268	2.1195	2.1229	2.1558	2.1242	2.1253	2.1213	2.1353	2.1229	2.1438	2.1365	2.1271	2.1306	2.1149	2.1105	2.159	2.1125	2.1099	2.1175	2.12657	0.0133985
	a612	2.1572	2.1579	2.1372	2.1719	2.1611	2.1649	2.1669	2.1733	2.1683	2.1926	2.1735	2.1763	2.1605	2.1619	2.1712	2.1694	2.162	2.1522	2.1512	2.1689	2.16492	0.0110861
	a613	2.1937	2.182	2.1779	2.1521	2.1784	2.1659	2.1644	2.1582	2.1576	2.1514	2.1549	2.1727	2.1702	2.1762	2.1694	2.1425	2.1644	2.178	2.161	2.181	2.16759	0.0123658
	a614	2.1559	2.1487	2.1299	2.1459	2.1311	2.1199	2.142	2.1376	2.1451	2.1071	2.1505	2.1323	2.1294	2.1507	2.1358	2.1151	2.1376	2.1343	2.1409	2.1328	2.13613	0.0120252
LHCⅡ M3	b601	2.2809	2.2721	2.2823	2.2727	2.2697	2.2625	2.259	2.2757	2.2517	2.268	2.2599	2.2597	2.2836	2.267	2.2568	2.2694	2.2703	2.2688	2.2772	2.2709	2.26891	0.0084782
	a602	2.1494	2.17	2.1611	2.1698	2.1235	2.1308	2.1339	2.1503	2.17	2.135	2.1711	2.1341	2.1297	2.1845	2.1494	2.1578	2.1043	2.1427	2.1418	2.1597	2.14845	0.0193483
	a603	2.1298	2.1373	2.1142	2.1466	2.1448	2.1366	2.1594	2.142	2.1269	2.1517	2.1465	2.1491	2.1434	2.1459	2.1513	2.1371	2.1378	2.1303	2.1585	2.117	2.14031	0.0118739
	a604	2.1381	2.1481	2.1368	2.1389	2.1564	2.1488	2.1368	2.1586	2.1592	2.1489	2.136	2.1525	2.1486	2.1447	2.1502	2.141	2.1695	2.1432	2.1301	2.1047	2.14455	0.0130654
	b605	2.2319	2.2386	2.2282	2.2007	2.2152	2.2168	2.2296	2.2259	2.2376	2.2243	2.2376	2.2515	2.2365	2.2357	2.2211	2.2321	2.2214	2.2174	2.2255	2.221	2.22743	0.0107704
	b606	2.2472	2.2737	2.2347	2.2606	2.2539	2.2505	2.2559	2.2387	2.2538	2.2655	2.2498	2.2496	2.2422	2.2595	2.2547	2.2606	2.2625	2.2558	2.2672	2.243	2.25397	0.00962778
	b607	2.2458	2.2312	2.2633	2.2266	2.2514	2.228	2.228	2.2392	2.2371	2.2456	2.2254	2.2487	2.2466	2.2625	2.2346	2.2542	2.2478	2.2501	2.2501	2.2431	2.24296	0.0110905
	b608	2.2674	2.2632	2.2719	2.2579	2.2307	2.2783	2.2594	2.2826	2.2404	2.2568	2.2314	2.253	2.2453	2.2341	2.2733	2.255	2.249	2.2581	2.2754	2.2586	2.25709	0.0149332
	b609	2.2546	2.2569	2.2599	2.2575	2.2529	2.2152	2.229	2.2535	2.2629	2.2769	2.2537	2.2411	2.2695	2.2253	2.2346	2.2795	2.2568	2.2652	2.2789	2.2631	2.25435	0.0171494
	a610	2.1249	2.1211	2.1232	2.1133	2.1281	2.1084	2.1087	2.1448	2.1355	2.1139	2.1167	2.1378	2.1148	2.0967	2.1158	2.1194	2.1286	2.1168	2.1178	2.0885	2.11874	0.0127787
	a611	2.128	2.1481	2.1279	2.139	2.1406	2.1466	2.148	2.1248	2.1419	2.1409	2.1383	2.1414	2.1301	2.1271	2.1504	2.151	2.153	2.1375	2.1276	2.1512	2.13967	0.00908598
	a612	2.1463	2.1573	2.1639	2.1641	2.1755	2.1811	2.1682	2.1609	2.1584	2.1508	2.1574	2.1541	2.1489	2.1763	2.1559	2.1714	2.165	2.1705	2.1577	2.1446	2.16141	0.00995642
	a613	2.1238	2.125	2.1342	2.1401	2.1094	2.1454	2.135	2.1354	2.1234	2.1652	2.1357	2.1347	2.1161	2.1161	2.1383	2.168	2.1372	2.1256	2.1344	2.1424	2.13427	0.0141685
	a614	2.1366	2.1105	2.1282	2.1501	2.1446	2.1196	2.1492	2.1201	2.137	2.1491	2.1346	2.1269	2.1519	2.1447	2.1402	2.143	2.1359	2.1595	2.1425	2.1287	2.13765	0.0120963
CP29	a601	2.1549	2.1179	2.1301	2.1309	2.1173	2.1257	2.12	2.1314	2.1073	2.1244	2.1136	2.1294	2.1436	2.1157	2.1141	2.1289	2.1265	2.1277	2.1224	2.1265	2.12541	0.0104296
	a602	2.1239	2.1301	2.1159	2.1224	2.1029	2.1292	2.1045	2.1026	2.1	2.1224	2.1253	2.1204	2.1204	2.0965	2.1125	2.0974	2.1202	2.1036	2.1358	2.1356	2.11608	0.0123854
	a603	2.143	2.1454	2.1263	2.1342	2.153	2.1346	2.1439	2.1388	2.1388	2.1339	2.1286	2.1503	2.1397	2.1358	2.1367	2.1412	2.1439	2.1402	2.1372	2.1484	2.1397	0.00659867
	a604	2.1351	2.1318	2.1252	2.1532	2.1503	2.134	2.1231	2.1383	2.1505	2.1236	2.1437	2.1334	2.1337	2.1477	2.1389	2.1275	2.1488	2.1224	2.1478	2.1269	2.1368	0.0100554
	b606	2.2576	2.2615	2.2416	2.273	2.1861	2.2611	2.2697	2.2796	2.2556	2.2819	2.2747	2.2315	2.2581	2.2438	2.2632	2.2452	2.2619	2.2491	2.2417	2.2421	2.25395	0.0206453
	b607	2.2222	2.2314	2.2623	2.2405	2.2328	2.2333	2.264	2.2401	2.2494	2.2631	2.2494	2.2267	2.2557	2.2616	2.2339	2.236	2.2055	2.2729	2.2502	2.2335	2.24323	0.0164704
	b608	2.2539	2.2751	2.2404	2.259	2.2622	2.2736	2.2584	2.2482	2.2341	2.245	2.2715	2.2184	2.2695	2.2558	2.2357	2.2627	2.2439	2.2506	2.2245	2.2574	2.25199	0.0154584
	a609	2.1146	2.0933	2.0855	2.106	2.1114	2.0979	2.1353	2.0954	2.1286	2.0705	2.0797	2.1087	2.1299	2.0705	2.0974	2.0926	2.1125	2.1003	2.094	2.1089	2.10165	0.0174997
	a610	2.1325	2.1243	2.1318	2.102	2.1303	2.1255	2.1212	2.0983	2.1404	2.1175	2.1244	2.118	2.1372	2.1712	2.1488	2.1099	2.1483	2.1631	2.1484	2.1225	2.13078	0.018287
	a611	2.1417	2.1558	2.1498	2.1162	2.1415	2.1332	2.1202	2.1167	2.1534	2.1587	2.1242	2.1263	2.15	2.1235	2.1373	2.1175	2.1441	2.1316	2.1417	2.115	2.13492	0.0140533
	a612	2.148	2.124	2.1307	2.1257	2.1382	2.1555	2.1384	2.145	2.1367	2.1483	2.1265	2.1383	2.134	2.1352	2.1151	2.1225	2.1195	2.1349	2.1219	2.1283	2.13334	0.0103792
	a613	2.1273	2.1413	2.1403	2.1643	2.133	2.1407	2.1585	2.1599	2.1321	2.1643	2.1305	2.1485	2.1421	2.1369	2.136	2.1329	2.1554	2.1459	2.1501	2.1408	2.14404	0.0111475
	a616	2.1506	2.1493	2.1439	2.1612	2.1512	2.1554	2.1356	2.1429	2.1296	2.1736	2.1663	2.1596	2.1403	2.1567	2.173	2.1649	2.1478	2.166	2.1655	2.1499	2.15416	0.011889
CP26	b601	2.2379	2.2311	2.2406	2.2357	2.2312	2.218	2.2528	2.2537	2.244	2.2388	2.224	2.2465	2.2287	2.2247	2.2473	2.2771	2.2632	2.2568	2.2436	2.2563	2.2426	0.0142943
	a602	2.1473	2.1573	2.1637	2.1303	2.1684	2.1399	2.145	2.1578	2.1558	2.1425	2.1552	2.1449	2.167	2.1337	2.1638	2.1704	2.15	2.1559	2.1621	2.1752	2.15431	0.0120659
	a603	2.1142	2.1449	2.122	2.1313	2.1234	2.1174	2.1249	2.1375	2.1322	2.143	2.1545	2.169	2.1173	2.1449	2.1332	2.144	2.1179	2.1133	2.1352	2.1305	2.13253	0.014197
	a604	2.1437	2.1499	2.1474	2.1533	2.1415	2.1433	2.1626	2.1339	2.144	2.1577	2.1507	2.1431	2.1415	2.1546	2.1296	2.1565	2.1375	2.1563	2.1635	2.1431	2.14769	0.00896182
	b606	2.2211	2.2086	2.206	2.2341	2.2251	2.2357	2.2514	2.2531	2.2729	2.1992	2.2232	2.2423	2.256	2.2338	2.2176	2.2358	2.2205	2.2743	2.2292	2.2243	2.23321	0.0199026
	b607	2.2451	2.2464	2.2556	2.2681	2.2683	2.2564	2.2618	2.2448	2.2391	2.2546	2.2448	2.2517	2.2442	2.2538	2.2586	2.2474	2.2393	2.2762	2.25	2.2359	2.25211	0.0103631
	b608	2.2712	2.2356	2.2608	2.2477	2.2354	2.2707	2.2647	2.2766	2.2565	2.2405	2.2614	2.2412	2.2323	2.266	2.2412	2.2328	2.2835	2.2781	2.248	2.2526	2.25484	0.0159383
	a609	2.0894	2.1243	2.113	2.1089	2.1451	2.1069	2.1211	2.1235	2.1205	2.0941	2.1137	2.1332	2.1288	2.088	2.1299	2.1092	2.1237	2.1019	2.1038	2.1228	2.11509	0.0146162
	a610	2.1107	2.1322	2.1436	2.1641	2.1237	2.1238	2.138	2.1338	2.1196	2.1311	2.1443	2.1373	2.1239	2.1471	2.1282	2.1328	2.1463	2.1293	2.1309	2.1202	2.13305	0.0117625
	a611	2.1193	2.1425	2.1214	2.1392	2.1448	2.1275	2.1505	2.1231	2.1405	2.1408	2.1263	2.1262	2.1347	2.1443	2.11	2.1347	2.1033	2.1157	2.1195	2.126	2.12951	0.0123796
	a612	2.1593	2.152	2.1722	2.1564	2.1518	2.1396	2.1417	2.1486	2.1804	2.174	2.1565	2.1409	2.1697	2.1508	2.1713	2.1438	2.1471	2.1679	2.1523	2.1516	2.1564	0.0118983
	a613	2.1592	2.1964	2.1641	2.162	2.147	2.1705	2.1664	2.1619	2.1756	2.1525	2.1535	2.1548	2.1619	2.1361	2.1274	2.1527	2.1396	2.1452	2.1392	2.1555	2.15608	0.0150166
	a614	2.1347	2.1361	2.1363	2.1191	2.1332	2.144	2.125	2.1361	2.1246	2.1341	2.1349	2.1398	2.1318	2.1382	2.1321	2.1307	2.1407	2.1371	2.1338	2.1319	2.13371	0.00563612
CP47	a602	2.1367	2.1201	2.1089	2.1028	2.1194	2.1337	2.1303	2.1432	2.1392	2.1015	2.1143	2.1266	2.152	2.1072	2.1218	2.128	2.1403	2.1509	2.1486	2.1335	2.12795	0.0152896
	a603	2.1333	2.1208	2.1236	2.148	2.1282	2.1243	2.1182	2.1273	2.1345	2.1362	2.1287	2.1357	2.1264	2.1275	2.1552	2.1463	2.1348	2.1347	2.1211	2.1157	2.13102	0.00990802
	a604	2.1334	2.1337	2.1296	2.137	2.1276	2.1306	2.14	2.1225	2.1458	2.1404	2.1551	2.1439	2.1397	2.1325	2.1223	2.1358	2.1393	2.142	2.1571	2.1521	2.13802	0.00942861
	a605	2.1549	2.1525	2.1563	2.1497	2.1468	2.1361	2.1423	2.1495	2.1144	2.1534	2.1229	2.1415	2.162	2.1531	2.1588	2.1587	2.1558	2.1335	2.1335	2.1513	2.14635	0.0123263
	a606	2.1262	2.1267	2.1385	2.1433	2.0957	2.1085	2.1334	2.1069	2.1078	2.1341	2.1146	2.1047	2.1087	2.14	2.0985	2.1489	2.1478	2.144	2.1019	2.1047	2.12174	0.0177877
	a607	2.1358	2.1062	2.1191	2.1407	2.1147	2.1447	2.1249	2.107	2.1219	2.13	2.1211	2.1502	2.1545	2.1181	2.1607	2.1237	2.1186	2.129	2.1142	2.1535	2.12943	0.0158774
	a608	2.1358	2.1592	2.1238	2.1492	2.124	2.1469	2.1491	2.1194	2.131	2.1524	2.1258	2.1437	2.1316	2.1385	2.1324	2.1316	2.1384	2.1189	2.1347	2.1283	2.13573	0.0110551
	a609	2.1482	2.1527	2.1292	2.1638	2.1511	2.1271	2.1593	2.162	2.1436	2.1469	2.1522	2.15	2.143	2.1403	2.1448	2.1413	2.1516	2.1503	2.1315	2.1682	2.14786	0.0106655
	a610	2.1553	2.1428	2.1395	2.1391	2.1406	2.1511	2.1285	2.1091	2.1361	2.1058	2.1336	2.1357	2.1327	2.1232	2.1269	2.118	2.1373	2.1378	2.1128	2.1319	2.13189	0.0126317
	a611	2.1136	2.1039	2.1044	2.1118	2.1223	2.1175	2.1382	2.1288	2.0981	2.1242	2.0943	2.1044	2.1292	2.1213	2.117	2.1233	2.1335	2.1284	2.138	2.1188	2.11855	0.0123986
	a612	2.1364	2.1356	2.1521	2.1189	2.1216	2.1249	2.1411	2.1618	2.1219	2.1473	2.1398	2.1354	2.1444	2.1256	2.138	2.1528	2.1455	2.1512	2.1488	2.1687	2.14059	0.0132542
	a613	2.1415	2.1491	2.1495	2.1222	2.1614	2.1432	2.1203	2.1274	2.1381	2.14	2.1476	2.1263	2.15	2.1279	2.1399	2.1589	2.1341	2.1266	2.1662	2.1431	2.14067	0.01277
	a614	2.1427	2.1124	2.1104	2.1154	2.1176	2.1279	2.1295	2.1272	2.1316	2.1089	2.1335	2.1294	2.1148	2.1276	2.1345	2.1127	2.1213	2.1339	2.1289	2.1424	2.12513	0.010057
	a615	2.1376	2.1519	2.1392	2.1555	2.1611	2.1478	2.1427	2.1573	2.1401	2.1666	2.1531	2.1521	2.1585	2.1482	2.1274	2.1566	2.1568	2.1438	2.1271	2.1318	2.14776	0.0109459
	a616	2.1409	2.1616	2.1814	2.1552	2.1531	2.1357	2.1726	2.1882	2.1538	2.1525	2.1733	2.1702	2.1502	2.1329	2.1617	2.137	2.1606	2.1579	2.143	2.154	2.15679	0.0146665
	a617	2.144	2.1395	2.1533	2.1377	2.1509	2.1356	2.1408	2.1463	2.1405	2.1385	2.1375	2.1492	2.1439	2.1513	2.1458	2.139	2.1469	2.1477	2.1341	2.1439	2.14332	0.00540524
CP43	a502	2.122	2.1496	2.1271	2.1312	2.1324	2.1516	2.1461	2.1417	2.1488	2.1243	2.1367	2.136	2.1317	2.1241	2.1293	2.1325	2.1163	2.1252	2.1495	2.126	2.1341	0.0102656
	a503	2.1364	2.136	2.1316	2.1301	2.135	2.1364	2.1307	2.1557	2.129	2.133	2.1492	2.1209	2.1402	2.1295	2.142	2.124	2.1346	2.132	2.1292	2.1369	2.13462	0.00774187
	a501	2.1412	2.1415	2.1357	2.1324	2.0969	2.1155	2.1359	2.1171	2.1118	2.1281	2.1161	2.1223	2.1449	2.1247	2.1237	2.1477	2.1404	2.1254	2.1365	2.1194	2.12786	0.012621
	a504	2.1551	2.1488	2.1329	2.1445	2.1525	2.1338	2.159	2.152	2.1333	2.139	2.1407	2.1437	2.1462	2.1362	2.1522	2.1522	2.1414	2.1482	2.1241	2.1591	2.14474	0.00928157
	a505	2.1317	2.1089	2.1253	2.1362	2.114	2.1095	2.1221	2.142	2.109	2.13	2.1331	2.1056	2.1252	2.126	2.1345	2.1279	2.124	2.1167	2.1167	2.1164	2.12274	0.0100537
	a506	2.1308	2.131	2.1223	2.1281	2.115	2.1271	2.1454	2.12	2.1169	2.1249	2.1349	2.1328	2.1176	2.1234	2.1346	2.1249	2.1397	2.1459	2.1279	2.118	2.12806	0.00874388
	a507	2.1354	2.1401	2.14	2.1333	2.1403	2.1357	2.1271	2.1256	2.1488	2.1468	2.1205	2.1169	2.1436	2.1391	2.1167	2.1388	2.1276	2.1253	2.1305	2.1433	2.13377	0.00935089
	a508	2.145	2.1162	2.1216	2.1306	2.1197	2.1313	2.1275	2.1271	2.1271	2.1208	2.126	2.1299	2.124	2.1365	2.1355	2.1203	2.1204	2.116	2.1362	2.1324	2.1272	0.00740463
	a509	2.1581	2.1348	2.1431	2.1551	2.1352	2.1283	2.1305	2.1415	2.1418	2.1393	2.161	2.1471	2.1481	2.1393	2.1372	2.1352	2.1425	2.1588	2.1418	2.1603	2.14395	0.00974626
	a510	2.1592	2.1479	2.1179	2.15	2.1501	2.1428	2.1282	2.1231	2.1347	2.1343	2.1308	2.1323	2.1497	2.129	2.1486	2.1215	2.1414	2.1484	2.1504	2.1211	2.13807	0.0119444
	a511	2.1721	2.1659	2.1572	2.1616	2.1796	2.1576	2.1691	2.1557	2.1644	2.1574	2.1621	2.1688	2.1597	2.1561	2.1681	2.16	2.1656	2.1559	2.1601	2.1632	2.16301	0.00611939
	a512	2.1351	2.1495	2.1367	2.1586	2.1465	2.1531	2.1472	2.1648	2.1521	2.1496	2.1429	2.158	2.1262	2.1411	2.1392	2.1149	2.1482	2.1377	2.1419	2.1407	2.1442	0.0111107
	a513	2.1434	2.1264	2.1286	2.143	2.1259	2.1406	2.1327	2.1394	2.138	2.1411	2.1417	2.1422	2.146	2.1327	2.1396	2.1685	2.1414	2.149	2.1315	2.1402	2.13959	0.00909645
LHCⅡ M1'	b601	2.2713	2.2721	2.2725	2.2796	2.2649	2.2782	2.2733	2.2721	2.2485	2.2753	2.2753	2.2766	2.2628	2.2813	2.2844	2.2488	2.2626	2.2799	2.2324	2.2738	2.26928	0.0126137
	a602	2.141	2.1255	2.1481	2.1339	2.1295	2.1404	2.1489	2.1382	2.1333	2.1217	2.1352	2.1254	2.1463	2.1351	2.1248	2.14	2.1447	2.1347	2.1435	2.1371	2.13637	0.00782376
	a603	2.1574	2.1773	2.1361	2.1603	2.1322	2.1554	2.1345	2.1587	2.1786	2.1341	2.1384	2.1402	2.1461	2.1529	2.1395	2.128	2.1597	2.1269	2.1195	2.1298	2.14528	0.016126
	a604	2.124	2.1275	2.1238	2.1111	2.1225	2.1409	2.132	2.135	2.118	2.1252	2.1318	2.1311	2.1196	2.1094	2.109	2.1099	2.1351	2.1531	2.128	2.1247	2.12559	0.0109381
	b605	2.2315	2.2314	2.232	2.2277	2.2326	2.2319	2.2587	2.2438	2.2379	2.2354	2.2366	2.2665	2.2345	2.2383	2.2264	2.216	2.2389	2.2499	2.2497	2.2431	2.23814	0.0112098
	b606	2.2681	2.2613	2.2723	2.2444	2.2667	2.2576	2.2586	2.2738	2.264	2.2333	2.2439	2.2576	2.2642	2.2574	2.2738	2.2537	2.2634	2.2583	2.2718	2.2728	2.26085	0.0106218
	b607	2.2503	2.2614	2.2431	2.2537	2.2418	2.2435	2.2518	2.2556	2.2161	2.2498	2.2434	2.2326	2.2347	2.2489	2.2393	2.2587	2.2611	2.2324	2.2487	2.2431	2.2455	0.0108022
	b608	2.2549	2.2763	2.2723	2.255	2.2702	2.273	2.2831	2.2732	2.2737	2.2692	2.2743	2.2574	2.271	2.2621	2.2506	2.2605	2.2677	2.2804	2.2878	2.2595	2.26861	0.00977849
	b609	2.2157	2.2617	2.2106	2.2587	2.2245	2.268	2.2279	2.2328	2.2215	2.2422	2.2468	2.2688	2.231	2.2522	2.2344	2.2733	2.2218	2.2622	2.2331	2.2313	2.24092	0.0187364
	a610	2.1408	2.1287	2.127	2.126	2.1322	2.1256	2.1074	2.1268	2.1254	2.1294	2.1351	2.1231	2.1291	2.1213	2.1225	2.145	2.1341	2.1091	2.1598	2.145	2.12967	0.0116316
	a611	2.113	2.1151	2.1157	2.1215	2.1166	2.1159	2.0959	2.1391	2.1157	2.1432	2.1445	2.1149	2.1318	2.13	2.1221	2.1292	2.1081	2.1317	2.1202	2.1189	2.12216	0.0117599
	a612	2.1792	2.1797	2.1609	2.1893	2.1828	2.2027	2.1858	2.2134	2.1907	2.202	2.1999	2.2057	2.1806	2.1838	2.1954	2.1702	2.2082	2.1792	2.1763	2.1757	2.18807	0.0135117
	a613	2.1616	2.1317	2.1194	2.1292	2.1303	2.102	2.1275	2.1218	2.1404	2.15	2.1236	2.1746	2.1392	2.1467	2.1466	2.126	2.1371	2.1346	2.1466	2.1177	2.13533	0.0159619
	a614	2.1392	2.1556	2.1369	2.1529	2.1223	2.1304	2.1325	2.1252	2.1353	2.134	2.125	2.1299	2.1179	2.1333	2.1425	2.1327	2.1492	2.1253	2.1348	2.1266	2.13408	0.00970546
LHCⅡ M2'	b601	2.2683	2.266	2.2667	2.2639	2.2611	2.2838	2.2672	2.2795	2.2518	2.2694	2.2676	2.2784	2.2696	2.2426	2.2675	2.256	2.2753	2.2664	2.2662	2.2642	2.26658	0.00908388
	a602	2.1661	2.1291	2.1763	2.1455	2.1506	2.1527	2.1999	2.17	2.1368	2.1962	2.1739	2.1844	2.1414	2.1686	2.1617	2.1671	2.1744	2.1849	2.1904	2.1692	2.16696	0.019078
	a603	2.1481	2.1529	2.1605	2.1615	2.1339	2.1545	2.1502	2.1421	2.1565	2.1554	2.1541	2.1425	2.1648	2.1516	2.1568	2.1547	2.1301	2.1365	2.1591	2.1257	2.14958	0.0106742
	a604	2.1405	2.1429	2.1381	2.153	2.1392	2.1422	2.1256	2.1443	2.1476	2.1272	2.1393	2.1081	2.1307	2.1154	2.1514	2.1256	2.1423	2.1344	2.119	2.1231	2.1345	0.0119131
	b605	2.2153	2.2299	2.2135	2.2147	2.2091	2.2197	2.2067	2.2361	2.2182	2.2158	2.2306	2.2161	2.2263	2.2209	2.2138	2.2233	2.2232	2.2435	2.2148	2.2465	2.2219	0.010496
	b606	2.2477	2.2552	2.2487	2.2648	2.2513	2.2713	2.2511	2.2782	2.2582	2.2495	2.2501	2.255	2.2772	2.2662	2.2641	2.264	2.2419	2.2295	2.2696	2.2683	2.25809	0.0120183
	b607	2.2235	2.2299	2.2329	2.2248	2.2344	2.2119	2.2232	2.2443	2.2367	2.1903	2.2058	2.2015	2.227	2.2239	2.2047	2.2137	2.2066	2.2082	2.2131	2.2153	2.21859	0.0133505
	b608	2.2614	2.2413	2.2513	2.2563	2.2629	2.245	2.2786	2.2672	2.2543	2.2824	2.2534	2.2718	2.2469	2.2653	2.2551	2.259	2.2655	2.2724	2.2734	2.2504	2.2607	0.0110907
	b609	2.2264	2.2366	2.2387	2.2651	2.2545	2.1912	2.2544	2.2082	2.2652	2.2356	2.2287	2.2474	2.2319	2.2418	2.2517	2.2294	2.2013	2.2175	2.2402	2.2412	2.23535	0.0191917
	a610	2.1466	2.1215	2.1205	2.1589	2.1169	2.1423	2.1351	2.138	2.1278	2.1311	2.1107	2.1573	2.1374	2.1553	2.1368	2.133	2.1942	2.143	2.1366	2.1819	2.14125	0.0200735
	a611	2.1388	2.1472	2.1527	2.1215	2.1463	2.1015	2.1238	2.1326	2.1241	2.1357	2.1323	2.1188	2.1135	2.1213	2.1139	2.1176	2.1364	2.1226	2.1221	2.1175	2.12701	0.0126065
	a612	2.1908	2.1794	2.161	2.1657	2.1677	2.172	2.1658	2.1727	2.1747	2.1659	2.1663	2.1398	2.166	2.153	2.1581	2.1726	2.1485	2.1679	2.1686	2.1679	2.16622	0.0106301
	a613	2.1442	2.1663	2.1528	2.1544	2.1767	2.1569	2.155	2.1784	2.1914	2.1616	2.1329	2.1515	2.1675	2.1527	2.1846	2.1535	2.1441	2.1744	2.1708	2.1749	2.16223	0.014622
	a614	2.1437	2.1473	2.1195	2.1282	2.1226	2.13	2.131	2.1306	2.1443	2.1382	2.1522	2.1349	2.1042	2.1422	2.1312	2.1377	2.1327	2.1261	2.1343	2.1197	2.13253	0.0108154
LHCⅡ M3'	b601	2.2485	2.2733	2.272	2.2821	2.2672	2.2647	2.272	2.2374	2.2697	2.2793	2.2719	2.2669	2.2715	2.2773	2.2677	2.2378	2.2223	2.2682	2.2768	2.2721	2.26493	0.0153945
	a602	2.1213	2.149	2.1416	2.1206	2.1411	2.1051	2.1226	2.1268	2.1246	2.1227	2.1271	2.1192	2.1172	2.1167	2.1384	2.1459	2.118	2.1325	2.1469	2.1302	2.12838	0.0116673
	a603	2.1383	2.1296	2.1054	2.1217	2.1071	2.1275	2.124	2.1358	2.1343	2.1278	2.1264	2.1286	2.1248	2.1389	2.1164	2.1459	2.1388	2.1401	2.1258	2.1255	2.12813	0.010182
	a604	2.1322	2.1655	2.1527	2.1536	2.1504	2.1492	2.1498	2.1436	2.1279	2.1387	2.1397	2.1511	2.1313	2.1441	2.1506	2.1272	2.1315	2.1255	2.1502	2.1488	2.14318	0.0106324
	b605	2.2358	2.2321	2.2343	2.2477	2.2443	2.2437	2.2526	2.2321	2.2434	2.2283	2.2449	2.211	2.2332	2.2113	2.2324	2.1946	2.2149	2.2209	2.2361	2.2526	2.23231	0.0148552
	b606	2.2397	2.2354	2.2395	2.2468	2.2629	2.2403	2.2347	2.2443	2.2629	2.238	2.2256	2.275	2.2712	2.274	2.2475	2.234	2.2504	2.2829	2.2509	2.2391	2.24975	0.0157897
	b607	2.2376	2.2308	2.2508	2.2499	2.2238	2.2576	2.2189	2.2418	2.243	2.2703	2.241	2.2328	2.2509	2.2438	2.227	2.2263	2.2447	2.2481	2.2475	2.2561	2.24214	0.0124651
	b608	2.2694	2.2754	2.2714	2.2909	2.2772	2.2757	2.2912	2.2573	2.2817	2.2802	2.2705	2.2617	2.2848	2.2691	2.2684	2.2762	2.2786	2.272	2.2792	2.2604	2.27456	0.00886636
	b609	2.2637	2.2385	2.2364	2.2453	2.2542	2.2624	2.2212	2.2395	2.2232	2.2411	2.243	2.2314	2.2354	2.2409	2.2426	2.2287	2.2599	2.2303	2.2493	2.1992	2.23931	0.0148604
	a610	2.1529	2.1492	2.1459	2.1579	2.1566	2.1552	2.1595	2.1256	2.1326	2.1511	2.1466	2.1485	2.136	2.1332	2.1721	2.1497	2.131	2.1443	2.1494	2.1476	2.14724	0.0109014
	a611	2.1412	2.1405	2.1313	2.1569	2.1448	2.1447	2.1425	2.1346	2.1536	2.1345	2.1334	2.1369	2.15	2.13	2.124	2.1325	2.1374	2.1425	2.1555	2.1458	2.14063	0.00866926
	a612	2.166	2.1459	2.1593	2.147	2.17	2.1452	2.1647	2.15	2.1578	2.1669	2.1561	2.152	2.1492	2.1486	2.1582	2.1584	2.1579	2.1263	2.1777	2.1571	2.15571	0.0107798
	a613	2.1358	2.1201	2.1443	2.1462	2.1434	2.169	2.1249	2.1393	2.1521	2.1451	2.1469	2.1312	2.1609	2.1186	2.1629	2.1285	2.1436	2.1353	2.1378	2.152	2.1419	0.0132526
	a614	2.1204	2.1222	2.1162	2.1455	2.151	2.1434	2.13	2.1416	2.1362	2.1255	2.145	2.1317	2.1306	2.1532	2.1396	2.1247	2.1383	2.1314	2.1215	2.1061	2.1327	0.011942
CP29'	a601	2.1383	2.114	2.1253	2.1364	2.1511	2.1365	2.1407	2.1407	2.1659	2.1446	2.1128	2.1518	2.1293	2.1252	2.1392	2.1444	2.1228	2.1653	2.146	2.1478	2.1389	0.0141027
	a602	2.1528	2.0993	2.102	2.141	2.1052	2.099	2.111	2.1045	2.1268	2.097	2.1227	2.1101	2.1376	2.1348	2.1	2.1435	2.1299	2.1013	2.1277	2.1237	2.11849	0.0171575
	a603	2.1229	2.1487	2.1276	2.125	2.1198	2.1141	2.1329	2.1414	2.1289	2.1263	2.1253	2.1203	2.112	2.1358	2.1203	2.1416	2.1277	2.1345	2.115	2.1263	2.12732	0.00939157
	a604	2.1513	2.1494	2.131	2.1458	2.1293	2.1207	2.1277	2.1183	2.1495	2.137	2.1347	2.1428	2.1556	2.1359	2.1413	2.1463	2.1655	2.153	2.1367	2.1104	2.13911	0.0133548
	b606	2.2203	2.2417	2.2667	2.2371	2.2248	2.2514	2.2402	2.2579	2.2394	2.2371	2.2555	2.224	2.2635	2.2373	2.2199	2.2539	2.2431	2.2192	2.1937	2.2188	2.23728	0.0178078
	b607	2.2695	2.2386	2.2658	2.2713	2.287	2.2397	2.2534	2.2931	2.1857	2.2478	2.251	2.2705	2.2485	2.2881	2.2794	2.2877	2.2716	2.2669	2.2615	2.2656	2.26213	0.0234952
	b608	2.237	2.2886	2.2674	2.23	2.254	2.2517	2.2538	2.2685	2.2428	2.2683	2.2353	2.2647	2.2708	2.2573	2.2431	2.2463	2.263	2.2702	2.2293	2.2693	2.25557	0.01559
	a609	2.1155	2.1077	2.0888	2.1006	2.0929	2.1277	2.1345	2.1193	2.0975	2.114	2.1183	2.1072	2.1273	2.091	2.1061	2.1063	2.1191	2.0864	2.0991	2.1072	2.10833	0.0132557
	a610	2.1402	2.1075	2.1396	2.1381	2.1478	2.1187	2.1325	2.1338	2.1215	2.0956	2.1295	2.1498	2.1123	2.1186	2.1151	2.1056	2.1049	2.1507	2.1206	2.0954	2.12389	0.0169399
	a611	2.1317	2.1443	2.1371	2.1634	2.1128	2.117	2.1431	2.1279	2.1224	2.1331	2.148	2.1259	2.1562	2.1309	2.1274	2.1407	2.1411	2.1448	2.1431	2.1137	2.13523	0.0131594
	a612	2.124	2.1453	2.1436	2.1409	2.1198	2.1264	2.1302	2.1164	2.1332	2.1305	2.1294	2.1534	2.1448	2.1098	2.1341	2.1405	2.1405	2.1354	2.1701	2.1287	2.13485	0.0131664
	a613	2.1399	2.1842	2.1499	2.1701	2.1547	2.1525	2.1496	2.1393	2.132	2.0999	2.1573	2.1521	2.1525	2.1557	2.1519	2.1304	2.1499	2.1699	2.1436	2.1442	2.14898	0.0167133
	a616	2.179	2.1719	2.1804	2.1557	2.1619	2.1736	2.1738	2.1729	2.1605	2.1731	2.1779	2.1782	2.1811	2.1607	2.1845	2.1584	2.174	2.1804	2.1787	2.1656	2.17211	0.00840371
CP26'	b601	2.2481	2.2625	2.2609	2.2413	2.2498	2.2221	2.2343	2.212	2.2238	2.2575	2.2578	2.2593	2.2545	2.2552	2.2451	2.2349	2.2052	2.2521	2.2399	2.2436	2.24299	0.0161023
	a602	2.1623	2.1527	2.1431	2.1445	2.1192	2.1187	2.1103	2.1364	2.1316	2.1497	2.1503	2.1306	2.1231	2.1446	2.1321	2.1515	2.1232	2.145	2.1322	2.1401	2.13706	0.013277
	a603	2.1441	2.1472	2.1592	2.1412	2.1568	2.1513	2.1573	2.1812	2.1596	2.1438	2.1235	2.1532	2.1313	2.1255	2.1671	2.1369	2.1268	2.1391	2.1342	2.1266	2.14529	0.0150797
	a604	2.1289	2.1255	2.133	2.1319	2.1424	2.149	2.1301	2.1373	2.1332	2.1455	2.1349	2.1453	2.1355	2.1405	2.1329	2.1348	2.1591	2.1398	2.129	2.1184	2.13635	0.00881655
	b606	2.2151	2.2107	2.2184	2.2203	2.236	2.2217	2.2171	2.2057	2.2344	2.24	2.2144	2.2051	2.2163	2.2166	2.2279	2.2323	2.2059	2.2182	2.2424	2.2291	2.22138	0.0110299
	b607	2.2407	2.2661	2.2358	2.2587	2.255	2.245	2.2334	2.2342	2.2695	2.2146	2.244	2.2501	2.2536	2.2506	2.2596	2.2408	2.2763	2.2469	2.2379	2.2188	2.24658	0.0152397
	b608	2.2838	2.2773	2.2192	2.2446	2.2463	2.269	2.246	2.2456	2.2606	2.2543	2.2571	2.2679	2.2312	2.2643	2.2725	2.2569	2.2775	2.2607	2.2576	2.2902	2.25913	0.0169801
	a609	2.1078	2.1337	2.1016	2.1048	2.1105	2.1257	2.1078	2.1215	2.0972	2.1207	2.1096	2.1016	2.1259	2.082	2.1234	2.1168	2.1423	2.1308	2.1304	2.1146	2.11544	0.0141104
	a610	2.1794	2.1808	2.1546	2.1525	2.1429	2.1464	2.1516	2.1186	2.1382	2.1696	2.1825	2.1531	2.1583	2.1651	2.1813	2.1351	2.1065	2.138	2.153	2.196	2.15517	0.0219155
	a611	2.1471	2.142	2.1451	2.1275	2.1363	2.1426	2.1277	2.1303	2.1483	2.122	2.132	2.1223	2.1386	2.1465	2.133	2.1465	2.1354	2.1159	2.1281	2.1165	2.13418	0.010069
	a612	2.1775	2.1489	2.1603	2.1501	2.1733	2.1779	2.155	2.1407	2.1421	2.1724	2.1536	2.1738	2.1536	2.1598	2.148	2.1643	2.1625	2.1523	2.1707	2.1665	2.16017	0.0112986
	a613	2.1753	2.1735	2.1442	2.1333	2.1626	2.1282	2.1337	2.1426	2.1559	2.1412	2.1567	2.1617	2.1355	2.1488	2.1424	2.1335	2.1442	2.1305	2.1414	2.1618	2.14735	0.0137508
	a614	2.1092	2.1183	2.1346	2.1424	2.1184	2.1116	2.1362	2.1203	2.1179	2.142	2.1311	2.1211	2.1459	2.1263	2.1203	2.1151	2.1394	2.1384	2.1296	2.1367	2.12774	0.0109666
CP47'	a602	2.1594	2.1474	2.1486	2.1655	2.1515	2.1495	2.1691	2.1463	2.1653	2.1553	2.1392	2.1501	2.1418	2.1507	2.1521	2.1533	2.1516	2.1582	2.1739	2.1605	2.15447	0.00875421
	a603	2.1225	2.1448	2.1179	2.1349	2.1457	2.149	2.1369	2.1298	2.1262	2.1302	2.1281	2.1494	2.125	2.1376	2.1555	2.1184	2.1407	2.1293	2.1277	2.1289	2.13393	0.0104313
	a604	2.1349	2.1233	2.1291	2.1327	2.1598	2.1419	2.126	2.1405	2.142	2.1454	2.1523	2.1472	2.1398	2.1308	2.1616	2.1513	2.127	2.1375	2.1402	2.1292	2.13963	0.0106612
	a605	2.1318	2.1341	2.1509	2.1458	2.1393	2.1415	2.1517	2.1443	2.1552	2.1486	2.1394	2.1576	2.1403	2.1308	2.1257	2.1321	2.1461	2.1538	2.1444	2.1442	2.14288	0.00859689
	a606	2.0851	2.1283	2.0978	2.1194	2.11	2.1257	2.1097	2.1258	2.1221	2.1062	2.1211	2.1207	2.0992	2.1346	2.1259	2.0866	2.1082	2.1071	2.0856	2.1272	2.11232	0.0148403
	a607	2.1339	2.1246	2.1153	2.1231	2.1211	2.1449	2.125	2.1105	2.131	2.1329	2.129	2.1324	2.1483	2.1317	2.1268	2.1066	2.118	2.1151	2.1245	2.1325	2.12636	0.0101583
	a608	2.1418	2.136	2.1425	2.1248	2.1409	2.1244	2.1203	2.1351	2.1293	2.1353	2.1216	2.1199	2.1406	2.1199	2.1427	2.1359	2.1261	2.1239	2.1151	2.1302	2.13032	0.00869743
	a609	2.1196	2.1308	2.139	2.1474	2.143	2.1536	2.121	2.1437	2.1571	2.1247	2.1247	2.1463	2.1577	2.1234	2.1423	2.1285	2.1387	2.1458	2.158	2.1616	2.14035	0.0131822
	a610	2.1322	2.1374	2.1365	2.1344	2.131	2.1169	2.1211	2.1296	2.103	2.123	2.1378	2.1311	2.139	2.1202	2.1749	2.1407	2.1487	2.1235	2.1375	2.1156	2.13171	0.0143495
	a611	2.1444	2.1076	2.1287	2.1175	2.1337	2.1256	2.1354	2.1281	2.1295	2.144	2.1439	2.1233	2.1413	2.1119	2.123	2.1389	2.1295	2.1246	2.1398	2.1194	2.1295	0.010449
	a612	2.1378	2.1464	2.132	2.1398	2.1371	2.1508	2.1278	2.139	2.1253	2.1253	2.1544	2.1502	2.1237	2.1489	2.1479	2.1353	2.1378	2.1368	2.1273	2.1196	2.13716	0.00997228
	a613	2.1313	2.1259	2.118	2.1264	2.1331	2.1162	2.1399	2.1365	2.1664	2.139	2.1415	2.1221	2.1343	2.1434	2.1406	2.1289	2.1385	2.1224	2.1495	2.1495	2.13517	0.0117982
	a614	2.1053	2.1142	2.1407	2.125	2.13	2.1418	2.1227	2.1124	2.1213	2.1177	2.1411	2.1246	2.1106	2.1407	2.128	2.1242	2.1378	2.1292	2.1164	2.1236	2.12536	0.0106468
	a615	2.1554	2.145	2.1398	2.1557	2.1347	2.1425	2.1478	2.1434	2.1374	2.1493	2.1441	2.1508	2.128	2.1533	2.1443	2.1495	2.146	2.1409	2.1554	2.15	2.14567	0.00708479
	a616	2.1607	2.1581	2.1735	2.1844	2.1861	2.1728	2.176	2.1677	2.1794	2.166	2.1611	2.1707	2.1812	2.1535	2.1671	2.1764	2.1334	2.1638	2.1648	2.1549	2.16758	0.012048
	a617	2.1734	2.1754	2.1534	2.1598	2.1515	2.1687	2.1357	2.1441	2.1697	2.1358	2.1712	2.1548	2.157	2.1662	2.1497	2.1432	2.1384	2.1468	2.1416	2.1517	2.1544	0.0125334
CP43'	a502	2.1514	2.1138	2.16	2.1675	2.1611	2.1594	2.1327	2.1498	2.1594	2.1567	2.1585	2.1414	2.1436	2.1362	2.137	2.152	2.1481	2.1469	2.1506	2.1527	2.14894	0.0120661
	a503	2.1308	2.1295	2.1251	2.15	2.1278	2.1327	2.1482	2.1358	2.1305	2.1307	2.131	2.1569	2.1266	2.1361	2.1363	2.1439	2.1372	2.1304	2.1311	2.1328	2.13517	0.0081713
	a501	2.1379	2.13	2.125	2.1249	2.1113	2.1379	2.1287	2.1024	2.1501	2.1369	2.1339	2.1539	2.1308	2.1253	2.127	2.1338	2.105	2.1203	2.1289	2.128	2.1286	0.0123658
	a504	2.1316	2.1255	2.1651	2.1273	2.145	2.1407	2.1236	2.1452	2.1384	2.1458	2.1216	2.1378	2.1482	2.1294	2.1368	2.1419	2.1351	2.1476	2.1439	2.1618	2.13962	0.0112603
	a505	2.1269	2.1209	2.1099	2.1283	2.1035	2.12	2.141	2.1086	2.1078	2.1196	2.1319	2.1149	2.1318	2.1001	2.111	2.1226	2.1452	2.115	2.119	2.113	2.11955	0.0116365
	a506	2.1343	2.1175	2.1161	2.1293	2.1227	2.1323	2.1172	2.1468	2.122	2.1432	2.1491	2.1345	2.1273	2.1183	2.1242	2.1272	2.1356	2.1247	2.1416	2.1416	2.13028	0.0100228
	a507	2.1226	2.1224	2.1247	2.1353	2.1357	2.1204	2.1222	2.1212	2.1299	2.1411	2.1214	2.1283	2.1054	2.1291	2.1326	2.1422	2.1378	2.1215	2.1499	2.1201	2.12819	0.0098865
	a508	2.1484	2.1485	2.1171	2.1533	2.1458	2.12	2.1455	2.1191	2.1207	2.1163	2.1259	2.1233	2.1293	2.1246	2.1377	2.1304	2.1293	2.1256	2.1214	2.1131	2.12976	0.012046
	a509	2.1309	2.1406	2.1466	2.1415	2.1608	2.1436	2.1704	2.142	2.1277	2.1389	2.1536	2.139	2.1186	2.1576	2.1623	2.1502	2.1584	2.1339	2.1511	2.1435	2.14556	0.0124563
	a510	2.1465	2.1295	2.1469	2.1353	2.1492	2.144	2.1258	2.1385	2.1407	2.1371	2.125	2.1476	2.1345	2.1373	2.1396	2.1358	2.127	2.1465	2.1438	2.1371	2.13839	0.00726521
	a511	2.1735	2.1562	2.1596	2.1505	2.1457	2.1607	2.1694	2.1566	2.1387	2.1575	2.1569	2.1651	2.1639	2.1578	2.1504	2.1644	2.1707	2.1671	2.1615	2.1612	2.15937	0.00830597
	a512	2.14	2.1412	2.1498	2.1585	2.1328	2.1468	2.1306	2.1362	2.1476	2.1395	2.1456	2.157	2.1485	2.1552	2.1369	2.154	2.1482	2.1458	2.1433	2.1573	2.14574	0.00799996
	a513	2.134	2.1519	2.137	2.149	2.1487	2.1521	2.1345	2.1498	2.1507	2.1439	2.1519	2.1453	2.1522	2.1461	2.15	2.1639	2.1546	2.1594	2.1529	2.147	2.14874	0.00723909
RC	a405	2.1546	2.1637	2.1555	2.1565	2.1522	2.1416	2.1449	2.1551	2.1586	2.154	2.1626	2.1538	2.1503	2.1568	2.1585	2.1519	2.1509	2.1627	2.1568	2.1675	2.15543	0.00600041
	a406	2.1405	2.1113	2.1474	2.1334	2.1486	2.1354	2.1403	2.1356	2.1344	2.1156	2.1361	2.1558	2.1498	2.1504	2.1233	2.1218	2.123	2.1157	2.1461	2.1234	2.13439	0.0128582
	a407	2.1363	2.1546	2.1451	2.1394	2.1496	2.1496	2.1563	2.1487	2.1585	2.1129	2.1261	2.1107	2.1071	2.1095	2.1316	2.121	2.1126	2.1141	2.1167	2.1043	2.13024	0.0182802
	a410	2.1328	2.1531	2.1495	2.1404	2.15	2.1308	2.1159	2.1487	2.1162	2.1463	2.1407	2.1395	2.1473	2.1497	2.1535	2.1326	2.146	2.1273	2.1423	2.1417	2.14021	0.0108416
	a402	2.1208	2.1308	2.1521	2.1569	2.146	2.152	2.1378	2.1589	2.1609	2.164	2.1687	2.1545	2.1598	2.1477	2.1587	2.1744	2.169	2.1771	2.1551	2.1654	2.15553	0.0136482
	a403	2.1148	2.0982	2.1095	2.1423	2.13	2.1377	2.1291	2.1441	2.139	2.1461	2.1404	2.1243	2.1187	2.1516	2.1498	2.1602	2.1602	2.1537	2.1616	2.1526	2.1382	0.0174525
RC'	a405	2.1554	2.1387	2.1634	2.1523	2.1611	2.1433	2.1706	2.1558	2.16	2.1411	2.1493	2.1531	2.15	2.1578	2.1511	2.1476	2.1525	2.1512	2.1559	2.149	2.15296	0.0073932
	a406	2.1404	2.1302	2.1353	2.1474	2.138	2.1341	2.119	2.1147	2.1299	2.1362	2.1176	2.1318	2.1496	2.1327	2.139	2.1245	2.1317	2.145	2.1538	2.1383	2.13446	0.0100958
	a407	2.1438	2.1551	2.1419	2.1291	2.1152	2.1537	2.1333	2.1215	2.1657	2.1561	2.1395	2.131	2.1471	2.1433	2.1582	2.1345	2.1413	2.1349	2.1434	2.1448	2.14167	0.0122168
	a410	2.1554	2.1534	2.1459	2.1448	2.1453	2.1249	2.1362	2.1493	2.1399	2.148	2.1477	2.1327	2.1311	2.1426	2.156	2.1562	2.1434	2.1486	2.1519	2.1423	2.14478	0.00833082
	a402	2.1765	2.1784	2.1371	2.1809	2.1539	2.1612	2.1247	2.191	2.1695	2.1738	2.1771	2.1596	2.15	2.1421	2.1769	2.1772	2.1807	2.1605	2.1455	2.1635	2.164	0.0169165
	a403	2.155	2.1817	2.1608	2.1452	2.1634	2.1691	2.1435	2.15	2.15	2.1459	2.1402	2.1543	2.1744	2.1903	2.1584	2.1371	2.1438	2.1125	2.1465	2.1751	2.15486	0.0172605

## Sheet: Table DS3
Table S3 Comparison of QM/MM and QM calculated site energy
Subunit	Pigment	QM/MM		QM
		Site energy(eV)	SD	Site energy(eV)	SD
LHCⅡ M1	b601	2.24502	0.0203611	2.26233	0.0180101
	a602	2.15611	0.0160024	2.1373	0.0142762
	a603	2.15227	0.00935726	2.14694	0.010737
	a604	2.14051	0.0126762	2.13816	0.0120402
	b605	2.25838	0.0148826	2.23213	0.0131031
	b606	2.25011	0.0125372	2.26414	0.0147173
	b607	2.21787	0.0166971	2.24137	0.0149645
	b608	2.25859	0.00897084	2.27159	0.0077781
	b609	2.27485	0.0131449	2.25304	0.0133743
	a610	2.15208	0.0110141	2.14561	0.0135523
	a611	2.1406	0.0132111	2.13075	0.00916169
	a612	2.14608	0.0110896	2.14388	0.00949798
	a613	2.14487	0.0185892	2.1559	0.0158723
	a614	2.13156	0.0112783	2.13401	0.0101248
LHCⅡ M2	b601	2.25536	0.0180134	2.24826	0.0163179
	a602	2.17675	0.0230744	2.1637	0.021265
	a603	2.15422	0.0128875	2.14048	0.0131537
	a604	2.13818	0.0151301	2.13745	0.0128894
	b605	2.27083	0.0158689	2.24844	0.0141154
	b606	2.25173	0.010943	2.25081	0.00926392
	b607	2.23045	0.0228828	2.24429	0.0223512
	b608	2.24539	0.00947364	2.25775	0.0100964
	b609	2.26234	0.023466	2.24116	0.0218707
	a610	2.15179	0.0213888	2.14634	0.0225351
	a611	2.13594	0.0154775	2.12657	0.0133985
	a612	2.16905	0.0121918	2.16492	0.0110861
	a613	2.15063	0.0139281	2.16759	0.0123658
	a614	2.13483	0.0124704	2.13613	0.0120252
LHCⅡ M3	b601	2.27506	0.010731	2.26891	0.0084782
	a602	2.16478	0.02521	2.14845	0.0193483
	a603	2.14317	0.0128187	2.14031	0.0118739
	a604	2.14322	0.0132228	2.14455	0.0130654
	b605	2.24104	0.0101487	2.22743	0.0107704
	b606	2.2485	0.0115188	2.25397	0.00962778
	b607	2.25401	0.0152633	2.24296	0.0110905
	b608	2.26732	0.0160916	2.25709	0.0149332
	b609	2.27333	0.014496	2.25435	0.0171494
	a610	2.12448	0.0131968	2.11874	0.0127787
	a611	2.13936	0.0109844	2.13967	0.00908598
	a612	2.16819	0.0101973	2.16141	0.00995642
	a613	2.14168	0.0180928	2.13427	0.0141685
	a614	2.12319	0.0111252	2.13765	0.0120963
CP29	a601	2.12587	0.0116215	2.12541	0.0104296
	a602	2.14139	0.0156793	2.11608	0.0123854
	a603	2.13928	0.00759063	2.1397	0.00659867
	a604	2.13136	0.0128797	2.1368	0.0100554
	b606	2.25006	0.0216654	2.25395	0.0206453
	b607	2.24089	0.0187997	2.24323	0.0164704
	b608	2.24712	0.017191	2.25199	0.0154584
	a609	2.14322	0.0189288	2.10165	0.0174997
	a610	2.14598	0.019533	2.13078	0.018287
	a611	2.15015	0.0144961	2.13492	0.0140533
	a612	2.14441	0.00985844	2.13334	0.0103792
	a613	2.1311	0.0112582	2.14404	0.0111475
	a616	2.14663	0.0148826	2.15416	0.011889
CP26	b601	2.23655	0.0183559	2.2426	0.0142943
	a602	2.1775	0.0136153	2.15431	0.0120659
	a603	2.1375	0.0144884	2.13253	0.014197
	a604	2.13491	0.0101528	2.14769	0.00896182
	b606	2.25566	0.0259976	2.23321	0.0199026
	b607	2.2375	0.0110492	2.25211	0.0103631
	b608	2.24045	0.0189647	2.25484	0.0159383
	a609	2.13587	0.0159562	2.11509	0.0146162
	a610	2.13077	0.0116754	2.13305	0.0117625
	a611	2.13516	0.012504	2.12951	0.0123796
	a612	2.16943	0.0127935	2.1564	0.0118983
	a613	2.14724	0.0162096	2.15608	0.0150166
	a614	2.13445	0.00683641	2.13371	0.00563612
CP47	a602	2.12172	0.0152295	2.12795	0.0152896
	a603	2.13524	0.0118451	2.13102	0.00990802
	a604	2.13455	0.0139377	2.13802	0.00942861
	a605	2.14882	0.0132504	2.14635	0.0123263
	a606	2.13159	0.0171588	2.12174	0.0177877
	a607	2.12122	0.0191536	2.12943	0.0158774
	a608	2.13639	0.0151806	2.13573	0.0110551
	a609	2.1574	0.0120869	2.14786	0.0106655
	a610	2.10748	0.0112192	2.13189	0.0126317
	a611	2.11369	0.0148853	2.11855	0.0123986
	a612	2.13128	0.013551	2.14059	0.0132542
	a613	2.14893	0.0172298	2.14067	0.01277
	a614	2.11829	0.0111806	2.12513	0.010057
	a615	2.13502	0.0127467	2.14776	0.0109459
	a616	2.15749	0.0151409	2.15679	0.0146665
	a617	2.11046	0.00770106	2.14332	0.00540524
CP43	a502	2.13621	0.0107464	2.1341	0.0102656
	a503	2.12536	0.00890367	2.13462	0.00774187
	a501	2.1143	0.0130809	2.12786	0.012621
	a504	2.15251	0.0100886	2.14474	0.00928157
	a505	2.11607	0.011772	2.12274	0.0100537
	a506	2.13799	0.00812018	2.12806	0.00874388
	a507	2.13857	0.0111303	2.13377	0.00935089
	a508	2.13745	0.00900886	2.1272	0.00740463
	a509	2.13509	0.00927014	2.14395	0.00974626
	a510	2.14549	0.0136787	2.13807	0.0119444
	a511	2.14853	0.0079283	2.16301	0.00611939
	a512	2.1334	0.0134263	2.1442	0.0111107
	a513	2.14685	0.0120775	2.13959	0.00909645
RC	a405	2.17502	0.0048636	2.15543	0.00600041
	a406	2.11825	0.0127513	2.13439	0.0128582
	a407	2.11371	0.0189434	2.13024	0.0182802
	a410	2.13628	0.0131941	2.14021	0.0108416
	a402	2.14763	0.0126059	2.15553	0.0136482
	a403	2.15473	0.018226	2.1382	0.0174525

## Sheet: Table DS4
Table S4 Coupling terms between pigment molecules
		LHCⅡ M1														LHCⅡ M2														LHCⅡ M3														CP29
		b601	a602	a603	a604	b605	b606	b607	b608	b609	a610	a611	a612	a613	a614	b601	a602	a603	a604	b605	b606	b607	b608	b609	a610	a611	a612	a613	a614	b601	a602	a603	a604	b605	b606	b607	b608	b609	a610	a611	a612	a613	a614	a601	a602	a603	a604	b606	b607
LHCⅡ M1	b601	18107.3	37.8184	-6.03034	-2.74387	0.317245	-1.65399	-1.92429	3.17505	4.30286	-4.10804	30.0635	-0.613369	-9.55619	2.63318	-0.0958889	-1.46052	2.17718	0.64659	-0.840675	-0.615608	0.665328	-1.25093	26.9606	-2.6529	-0.28281	0.723151	0.175488	0.548334	0.175515	-0.0458051	-1.38097	-0.444205	0.122384	-0.157751	-0.388693	0.453313	0.585672	0.160607	-0.0153722	0.0517043	-1.1064	0.720305	-0.00508088	-0.0094166	0.0165941	0.0139601	0.0153684	-0.00339742
	a602	37.8184	17390.2	12.514	2.47548	-0.004398	1.84326	1.99896	-2.44339	-11.0274	-2.3226	-1.39012	5.976	0.793027	-0.185026	0.137455	0.255377	4.86014	-0.202085	0.101733	0.26608	-0.320608	-0.0467681	-2.86625	1.12589	0.278481	-0.136082	-0.37954	-0.339128	-0.435004	0.0951693	2.11053	0.434648	-0.0868215	0.346459	0.359285	-0.559696	-0.58309	-0.255908	-0.0196665	0.061934	1.59423	-0.763277	0.00823957	0.000303387	0.00058257	-0.0157289	-0.0074299	-0.00520244
	a603	-6.03034	12.514	17359.2	2.04743	0.148932	0.568643	4.75133	3.4464	86.3404	8.19038	-0.182564	1.71919	4.05376	-4.51334	-0.93346	3.1026	-0.952291	1.64941	0.123977	1.84859	1.50722	-0.0198102	0.866107	-0.126197	-0.436212	1.0774	-0.192934	-0.237894	3.49063	2.19149	-3.65528	-0.328699	0.496723	-0.080305	-0.294963	0.993899	1.23685	0.699073	-0.24633	1.59538	-3.92972	1.05124	-0.0124523	0.00540901	0.0140263	0.00228014	0.00774798	-0.0141888
	a604	-2.74387	2.47548	2.04743	17264.4	5.84528	114.566	24.7303	-2.66116	4.67795	2.10517	-2.79105	6.25894	2.95471	-2.91549	-0.170238	0.922602	-0.146601	0.740489	-0.15487	0.762897	0.680021	0.0626074	-0.183198	-0.0310546	-0.0909965	0.0987875	-0.0733965	-0.550839	0.881438	-0.119976	2.00396	0.803001	-0.148648	0.226342	0.614753	-0.562836	-0.586125	-0.239735	0.0984281	-0.0562045	2.50731	-3.28498	0.0273646	-0.0346323	0.0122162	0.0136335	0.011385	0.0139772
	b605	0.317245	-0.004398	0.148932	5.84528	18215.1	5.22624	-2.01083	-2.9747	-0.030509	0.708629	0.610875	-1.39573	-0.831982	-0.0551956	0.0670768	-0.119266	0.00339332	-0.0785398	0.00512255	-0.0271736	-0.0933015	0.00425528	-0.101576	0.105663	0.0436268	-0.0238815	0.0139509	-0.00935445	-0.388815	0.102556	0.0651296	-0.189254	-0.00145996	-0.0108216	-0.176696	0.00672444	0.0437416	0.000639945	0.0303421	0.232789	-0.848777	0.412901	0.0137739	-0.0100881	0.0137107	-0.0105958	-0.00535461	-0.0103641
	b606	-1.65399	1.84326	0.568643	114.566	5.22624	18148.3	12.1656	-2.61892	9.64562	0.289447	-1.22015	1.99496	0.994339	-1.43871	-0.18287	0.781414	-0.0326263	0.530269	-0.0194713	0.554883	0.311821	0.0319156	-0.076995	-0.00119026	-0.0899187	0.16821	-0.0867465	-0.440266	0.286497	-0.0281764	1.82868	0.764341	-0.0436194	0.199076	0.472096	-0.434019	-0.456407	-0.136453	-0.206222	0.229474	1.56878	-3.6046	0.00890574	-0.0169364	0.0120783	0.0110717	0.0118948	0.00276475
	b607	-1.92429	1.99896	4.75133	24.7303	-2.01083	12.1656	17888.4	-1.52908	6.20329	-0.362581	-1.21532	1.12349	2.87105	-1.54792	-0.142131	0.863688	-0.0518485	0.670096	-0.147718	0.567074	0.879278	0.104913	-0.355385	-0.0775366	-0.0798083	0.0021021	0.0743108	-0.589866	0.416373	-0.0455049	2.7806	1.1099	-0.2367	0.193314	1.20103	-0.590632	-0.72887	-0.324932	0.0298089	-0.360763	18.1202	-4.61681	0.00319344	-0.00850438	-0.00649944	0.0140192	0.00876502	0.0157991
	b608	3.17505	-2.44339	3.4464	-2.66116	-2.9747	-2.61892	-1.52908	18216.8	27.4013	66.3697	4.00539	-0.371908	-2.48987	1.12657	0.345668	-0.989387	0.596409	-0.5662	0.056412	-0.433329	-0.510973	-0.0305077	-0.0818241	0.326603	0.179604	-0.165286	-0.0783296	0.211629	4.3011	-0.264828	-0.390508	-0.461942	-0.0444476	-0.0992115	-0.390347	0.171222	0.324346	-0.163044	0.736659	-0.565749	-1.05496	-0.0942355	0.00312488	0.00867887	-0.0107816	-0.0145643	-0.0156714	-0.000275013
	b609	4.30286	-11.0274	86.3404	4.67795	-0.030509	9.64562	6.20329	27.4013	18347.9	-2.18608	2.2164	0.311407	-2.86033	1.62603	0.591057	-1.7908	0.830884	-0.818836	0.0820331	-0.706212	-0.853767	-0.0621741	0.284088	0.338775	0.269221	-0.250749	-0.146147	0.222007	22.0017	-1.50729	-0.336634	-0.440109	-0.152697	-0.0780957	-0.546112	-0.0268127	0.373101	-0.577022	1.42854	-1.04395	-0.230017	-3.46709	0.00677294	0.00293522	-0.00391102	-0.0134586	-0.0127596	-0.0029953
	a610	-4.10804	-2.3226	8.19038	2.10517	0.708629	0.289447	-0.362581	66.3697	-2.18608	17357.6	-25.861	13.2469	6.90913	-0.713034	-0.319088	0.738388	-0.571596	0.410036	0.145049	0.167406	0.142188	-0.10735	1.55562	-0.401356	-0.186589	0.44421	-0.0120926	0.0366424	-1.9998	0.667167	-0.295085	-0.0123393	0.185017	-0.0181788	-0.0960824	0.220143	0.22182	0.187035	-0.433327	0.833718	-0.738632	0.0833136	-0.0243038	0.0114352	0.0149444	0.00962236	0.015564	-0.0153285
	a611	30.0635	-1.39012	-0.182564	-2.79105	0.610875	-1.22015	-1.21532	4.00539	2.2164	-25.861	17265.1	123.397	-2.26585	-4.20332	-0.260117	0.226828	-0.142476	0.422367	-0.133977	-0.541282	0.532411	0.00133161	3.96973	-1.03981	-0.194123	0.497512	0.125007	0.170057	-0.412714	0.0753067	-0.804334	-0.0861416	0.104915	-0.0530122	-0.072232	0.204395	0.30433	0.171258	-0.178277	0.217236	-0.387766	0.391514	0.000341016	-0.0157336	0.0274892	0.0100702	0.0149696	-0.0105894
	a612	-0.613369	5.976	1.71919	6.25894	-1.39573	1.99496	1.12349	-0.371908	0.311407	13.2469	123.397	17309.3	9.06255	0.648704	0.197368	-0.152625	0.78753	-0.21278	0.252674	0.418334	-0.748539	0.145503	-1.5266	0.883006	0.174893	-0.0759749	-0.211941	-0.197245	0.577668	-0.0724675	1.09096	0.0581517	-0.0144097	0.0477524	-0.103869	-0.180799	-0.104961	-0.183337	0.155947	0.064397	-0.396896	-0.909999	0.0174062	0.00441431	0.00209545	-0.034254	-0.0280401	-0.0184582
	a613	-9.55619	0.793027	4.05376	2.95471	-0.831982	0.994339	2.87105	-2.48987	-2.86033	6.90913	-2.26585	9.06255	17299.5	-16.597	0.0899022	0.234766	-1.85983	0.000653184	-0.959486	-1.70619	11.0512	-0.0106648	1.08844	-1.04225	0.0113678	-0.859389	0.541858	0.136008	0.385493	-0.213568	-0.0223228	-0.0587812	-0.310668	-0.0241507	0.551607	-0.107857	-0.390162	-0.0326325	0.144051	-0.584734	2.40699	-0.057839	-0.0278213	0.0204352	-0.031084	0.0223045	0.0106695	0.0249818
	a614	2.63318	-0.185026	-4.51334	-2.91549	-0.0551956	-1.43871	-1.54792	1.12657	1.62603	-0.713034	-4.20332	0.648704	-16.597	17192.2	0.573311	-1.93984	0.90859	-3.07127	0.531986	-3.62109	-1.2262	0.123244	-5.26228	0.274808	0.375827	-0.945156	0.0610648	0.548759	0.407537	-0.220894	-0.49004	-0.603195	-0.0244893	-0.172429	-0.435231	0.285018	0.240568	0.0209233	0.112482	-0.218256	-0.685837	0.534904	-0.0457015	0.0382314	-0.00233354	0.00530592	0.00936476	-0.0159601
LHCⅡ M2	b601	-0.0958889	0.137455	-0.93346	-0.170238	0.0670768	-0.18287	-0.142131	0.345668	0.591057	-0.319088	-0.260117	0.197368	0.0899022	0.573311	18190.7	41.534	-1.19236	-1.36332	0.300397	-0.949931	-0.917484	-0.491621	2.76638	-4.54934	2.32858	6.79386	-1.74416	0.576703	-0.256367	-0.075453	-0.70536	1.45307	-1.30023	0.519796	0.966161	2.13793	11.2174	1.80151	-0.358719	0.602403	0.0795232	0.238315	0.0105663	-0.00416402	-0.00109004	-0.00731748	-0.00704753	0.000420233
	a602	-1.46052	0.255377	3.1026	0.922602	-0.119266	0.781414	0.863688	-0.989387	-1.7908	0.738388	0.226828	-0.152625	0.234766	-1.93984	41.534	17556.7	9.02583	4.26515	-0.207532	3.30001	3.3879	1.00462	-20.4543	-3.96192	-1.33476	11.452	0.343823	-0.5695	-0.199633	0.221741	6.70492	-0.0613898	0.407412	0.0313273	0.0408641	-0.603985	-2.00692	-0.953168	0.213601	-0.00293073	0.955461	-0.607004	-0.024318	0.0189591	-0.00750465	0.00609742	0.00518964	-0.00072358
	a603	2.17718	4.86014	-0.952291	-0.146601	0.00339332	-0.0326263	-0.0518485	0.596409	0.830884	-0.571596	-0.142476	0.78753	-1.85983	0.90859	-1.19236	9.02583	17375	0.434618	0.0276447	0.533142	1.16765	-0.0539019	39.4858	3.35452	-0.115814	0.280875	2.02637	-1.42096	-0.364408	0.454945	-1.77598	0.929093	0.0882448	0.00666541	1.28872	-0.287188	-0.517125	0.0719249	-0.407756	0.464115	0.638571	-0.115108	0.00918869	-0.00433122	0.00494971	-0.00643725	-0.00378146	-0.0056781
	a604	0.64659	-0.202085	1.64941	0.740489	-0.0785398	0.530269	0.670096	-0.5662	-0.818836	0.410036	0.422367	-0.21278	0.000653184	-3.07127	-1.36332	4.26515	0.434618	17245.6	2.54564	70.9451	22.6822	0.0338688	6.41913	2.10733	-1.60814	3.39902	0.178648	-1.81847	-0.40916	0.290425	-0.345478	0.696385	-0.210456	0.307215	0.944561	-0.459183	-0.298041	0.0123912	-0.053253	0.0841854	0.815988	-0.415279	-0.0063774	0.00628485	-0.0183987	0.0079665	-0.000134281	0.0144146
	b605	-0.840675	0.101733	0.123977	-0.15487	0.00512255	-0.0194713	-0.147718	0.056412	0.0820331	0.145049	-0.133977	0.252674	-0.959486	0.531986	0.300397	-0.207532	0.0276447	2.54564	18315.5	6.00722	-1.59815	-0.627633	-0.184627	0.84464	0.210412	-1.08636	-0.0104401	-0.043229	0.0810592	-0.00165581	0.282839	-0.103365	0.019389	-0.00761521	-0.17418	-0.00196562	-0.020484	-0.0474712	0.0523379	0.00808879	-0.249269	-0.00845538	-0.0106531	0.0119702	0.00168697	-0.00427568	-0.00179183	-0.0098399
	b606	-0.615608	0.26608	1.84859	0.762897	-0.0271736	0.554883	0.567074	-0.433329	-0.706212	0.167406	-0.541282	0.418334	-1.70619	-3.62109	-0.949931	3.30001	0.533142	70.9451	6.00722	18161.5	15.6493	0.96435	12.1103	1.19783	-0.66486	1.8801	0.0576128	-0.963512	-0.343979	0.252391	-0.0533451	0.638304	0.0215169	0.201695	0.55924	-0.284959	-0.176859	-0.00790198	-0.106267	0.224739	0.526372	-0.315579	0.00983636	-0.000747827	-0.0144842	-0.00598364	-0.0091322	0.00983031
	b607	0.665328	-0.320608	1.50722	0.680021	-0.0933015	0.311821	0.879278	-0.510973	-0.853767	0.142188	0.532411	-0.748539	11.0512	-1.2262	-0.917484	3.3879	1.16765	22.6822	-1.59815	15.6493	17989.8	-0.0776226	6.51877	-0.0180608	-0.707872	1.18437	0.0317196	-0.785494	-0.295452	0.475438	-0.396134	0.566208	-0.161579	0.168602	1.01321	-0.295671	-0.260143	0.050488	-0.102675	-0.00397976	1.48265	-0.211133	0.00415509	-0.00636299	-0.00664145	0.0100831	0.00258607	0.0124315
	b608	-1.25093	-0.0467681	-0.0198102	0.0626074	0.00425528	0.0319156	0.104913	-0.0305077	-0.0621741	-0.10735	0.00133161	0.145503	-0.0106648	0.123244	-0.491621	1.00462	-0.0539019	0.0338688	-0.627633	0.96435	-0.0776226	18110.3	-7.42496	-11.5971	-1.51367	0.0830477	0.182794	-0.235733	-0.0396999	0.100527	-0.326703	0.114748	-0.00526489	-0.000472759	0.151373	-0.0204452	-0.0174169	0.0887501	0.0704761	0.0258894	0.119696	-0.00344215	0.00367874	-0.00165306	-0.00145987	-0.00130286	9.02615e-05	0.00110812
	b609	26.9606	-2.86625	0.866107	-0.183198	-0.101576	-0.076995	-0.355385	-0.0818241	0.284088	1.55562	3.96973	-1.5266	1.08844	-5.26228	2.76638	-20.4543	39.4858	6.41913	-0.184627	12.1103	6.51877	-7.42496	18247	-1.88665	1.58752	0.407781	-0.782653	1.25213	0.698154	-0.567989	2.3984	-0.92177	0.128201	-0.286163	-1.28186	0.428879	0.596821	-0.189297	0.246914	-0.187076	-1.17429	0.0605138	-0.0242705	0.0157295	-0.000272825	0.00855637	0.00904864	-0.00418025
	a610	-2.6529	1.12589	-0.126197	-0.0310546	0.105663	-0.00119026	-0.0775366	0.326603	0.338775	-0.401356	-1.03981	0.883006	-1.04225	0.274808	-4.54934	-3.96192	3.35452	2.10733	0.84464	1.19783	-0.0180608	-11.5971	-1.88665	17355.4	-14.1414	17.6116	1.62524	-0.140643	-0.274201	0.225496	-1.68802	0.583188	0.220692	0.127387	0.646346	0.16857	0.725161	0.200863	-0.158127	0.403727	0.104991	0.0193854	0.018574	-0.00555284	0.00689337	-0.0189607	-0.0137508	-0.0102475
	a611	-0.28281	0.278481	-0.436212	-0.0909965	0.0436268	-0.0899187	-0.0798083	0.179604	0.269221	-0.186589	-0.194123	0.174893	0.0113678	0.375827	2.32858	-1.33476	-0.115814	-1.60814	0.210412	-0.66486	-0.707872	-1.51367	1.58752	-14.1414	17227.5	76.4487	0.38424	-0.840844	-0.0598657	0.0841307	-0.751663	0.32811	-0.0157875	0.103094	0.533536	1.00439	0.719452	0.120402	-0.149028	0.227264	0.0106002	0.163827	0.00837974	-0.00345909	0.000212443	-0.00824946	-0.00405608	-0.00113786
	a612	0.723151	-0.136082	1.0774	0.0987875	-0.0238815	0.16821	0.0021021	-0.165286	-0.250749	0.44421	0.497512	-0.0759749	-0.859389	-0.945156	6.79386	11.452	0.280875	3.39902	-1.08636	1.8801	1.18437	0.0830477	0.407781	17.6116	76.4487	17494.6	1.21878	1.36581	0.120579	-0.0270497	2.00959	-0.228939	0.345412	-0.00772771	-0.657188	-0.540558	-0.791107	-0.38609	0.130084	0.0100641	-0.294971	-0.178758	-0.0179971	0.0124133	0.0032515	0.00280794	0.00510104	-0.00769088
	a613	0.175488	-0.37954	-0.192934	-0.0733965	0.0139509	-0.0867465	0.0743108	-0.0783296	-0.146147	-0.0120926	0.125007	-0.211941	0.541858	0.0610648	-1.74416	0.343823	2.02637	0.178648	-0.0104401	0.0576128	0.0317196	0.182794	-0.782653	1.62524	0.38424	1.21878	17346	-5.544	0.0487591	-0.158744	-2.31009	-0.480965	-0.428081	-0.560821	1.91285	0.165233	0.322965	0.479452	0.0225857	-0.386357	0.402222	0.161952	0.00238485	-0.00395168	0.00139437	0.00232099	0.00104975	0.00207727
	a614	0.548334	-0.339128	-0.237894	-0.550839	-0.00935445	-0.440266	-0.589866	0.211629	0.222007	0.0366424	0.170057	-0.197245	0.136008	0.548759	0.576703	-0.5695	-1.42096	-1.81847	-0.043229	-0.963512	-0.785494	-0.235733	1.25213	-0.140643	-0.840844	1.36581	-5.544	17218.6	0.742223	-0.452606	2.46288	-4.31825	0.604191	-1.35352	-7.88395	0.670698	-3.62345	-0.256553	0.310025	-1.05581	-1.13286	0.287603	0.00954856	-0.00930798	0.0133392	-0.0037843	0.000532915	-0.00776758
LHCⅡ M3	b601	0.175515	-0.435004	3.49063	0.881438	-0.388815	0.286497	0.416373	4.3011	22.0017	-1.9998	-0.412714	0.577668	0.385493	0.407537	-0.256367	-0.199633	-0.364408	-0.40916	0.0810592	-0.343979	-0.295452	-0.0396999	0.698154	-0.274201	-0.0598657	0.120579	0.0487591	0.742223	18349.6	9.16894	-5.37672	-2.13945	0.383604	-0.43624	-1.39802	2.03998	1.94781	1.30834	10.1781	-1.47906	-5.67126	-0.2087	-0.0111349	0.0136774	-0.0156073	0.00019566	-0.00464062	0.00647205
	a602	-0.0458051	0.0951693	2.19149	-0.119976	0.102556	-0.0281764	-0.0455049	-0.264828	-1.50729	0.667167	0.0753067	-0.0724675	-0.213568	-0.220894	-0.075453	0.221741	0.454945	0.290425	-0.00165581	0.252391	0.475438	0.100527	-0.567989	0.225496	0.0841307	-0.0270497	-0.158744	-0.452606	9.16894	17460.1	9.61368	1.48662	-0.0947234	1.0624	1.27724	-1.97289	-3.74046	0.283684	-0.293166	3.30314	1.57501	-0.0848075	0.00182607	-0.00300091	0.00579681	-0.00081084	0.0016266	-0.00414367
	a603	-1.38097	2.11053	-3.65528	2.00396	0.0651296	1.82868	2.7806	-0.390508	-0.336634	-0.295085	-0.804334	1.09096	-0.0223228	-0.49004	-0.70536	6.70492	-1.77598	-0.345478	0.282839	-0.0533451	-0.396134	-0.326703	2.3984	-1.68802	-0.751663	2.00959	-2.31009	2.46288	-5.37672	9.61368	17285.9	2.03512	0.19573	-0.223443	2.21736	2.9916	74.1382	-3.69133	-0.485465	1.75785	15.3652	-2.4978	-0.0163825	0.0192231	-0.0120231	-0.00349585	-0.004665	-0.000749414
	a604	-0.444205	0.434648	-0.328699	0.803001	-0.189254	0.764341	1.1099	-0.461942	-0.440109	-0.0123393	-0.0861416	0.0581517	-0.0587812	-0.603195	1.45307	-0.0613898	0.929093	0.696385	-0.103365	0.638304	0.566208	0.114748	-0.92177	0.583188	0.32811	-0.228939	-0.480965	-4.31825	-2.13945	1.48662	2.03512	17286.2	6.81476	33.7923	22.6876	-7.93011	5.61703	-0.890206	-1.32034	3.64361	4.51339	-1.74505	-0.00976526	0.00316824	-0.00521167	0.0116477	0.00835223	0.00688893
	b605	0.122384	-0.0868215	0.496723	-0.148648	-0.00145996	-0.0436194	-0.2367	-0.0444476	-0.152697	0.185017	0.104915	-0.0144097	-0.310668	-0.0244893	-1.30023	0.407412	0.0882448	-0.210456	0.019389	0.0215169	-0.161579	-0.00526489	0.128201	0.220692	-0.0157875	0.345412	-0.428081	0.604191	0.383604	-0.0947234	0.19573	6.81476	18075.2	2.10094	-3.50203	-3.38456	0.0247412	-0.528724	0.526013	-1.92803	-0.864263	-0.221379	-0.000411746	-0.000364777	0.0076988	-0.00250336	0.000825111	-0.00738266
	b606	-0.157751	0.346459	-0.080305	0.226342	-0.0108216	0.199076	0.193314	-0.0992115	-0.0780957	-0.0181788	-0.0530122	0.0477524	-0.0241507	-0.172429	0.519796	0.0313273	0.00666541	0.307215	-0.00761521	0.201695	0.168602	-0.000472759	-0.286163	0.127387	0.103094	-0.00772771	-0.560821	-1.35352	-0.43624	1.0624	-0.223443	33.7923	2.10094	18135.3	5.42793	-3.27218	5.51104	0.0712254	-0.0104876	0.661229	0.876267	-0.206375	-0.00405734	0.00262956	-0.0031108	0.00384919	0.000943842	0.00225296
	b607	-0.388693	0.359285	-0.294963	0.614753	-0.176696	0.472096	1.20103	-0.390347	-0.546112	-0.0960824	-0.072232	-0.103869	0.551607	-0.435231	0.966161	0.0408641	1.28872	0.944561	-0.17418	0.55924	1.01321	0.151373	-1.28186	0.646346	0.533536	-0.657188	1.91285	-7.88395	-1.39802	1.27724	2.21736	22.6876	-3.50203	5.42793	18179.9	-2.81641	9.60269	0.404437	-0.636428	0.532096	5.69956	-0.644666	-0.00243931	-0.00143589	-0.00630512	0.00933334	0.00518587	0.00960043
	b608	0.453313	-0.559696	0.993899	-0.562836	0.00672444	-0.434019	-0.590632	0.171222	-0.0268127	0.220143	0.204395	-0.180799	-0.107857	0.285018	2.13793	-0.603985	-0.287188	-0.459183	-0.00196562	-0.284959	-0.295671	-0.0204452	0.428879	0.16857	1.00439	-0.540558	0.165233	0.670698	2.03998	-1.97289	2.9916	-7.93011	-3.38456	-3.27218	-2.81641	18287.2	10.3025	-21.2084	1.59444	-2.40526	-2.05558	0.454139	0.0123152	-0.0105813	0.00965626	-0.00481425	-0.00121058	-0.00426815
	b609	0.585672	-0.58309	1.23685	-0.586125	0.0437416	-0.456407	-0.72887	0.324346	0.373101	0.22182	0.30433	-0.104961	-0.390162	0.240568	11.2174	-2.00692	-0.517125	-0.298041	-0.020484	-0.176859	-0.260143	-0.0174169	0.596821	0.725161	0.719452	-0.791107	0.322965	-3.62345	1.94781	-3.74046	74.1382	5.61703	0.0247412	5.51104	9.60269	10.3025	18335.6	0.470442	0.292902	0.342208	-2.47946	0.580209	0.00792873	-0.00659462	0.00913432	-0.00394758	-0.00124773	-0.00590643
	a610	0.160607	-0.255908	0.699073	-0.239735	0.000639945	-0.136453	-0.324932	-0.163044	-0.577022	0.187035	0.171258	-0.183337	-0.0326325	0.0209233	1.80151	-0.953168	0.0719249	0.0123912	-0.0474712	-0.00790198	0.050488	0.0887501	-0.189297	0.200863	0.120402	-0.38609	0.479452	-0.256553	1.30834	0.283684	-3.69133	-0.890206	-0.528724	0.0712254	0.404437	-21.2084	0.470442	17135.1	5.99411	-7.81663	-1.0101	0.0316736	0.00517211	-0.00633412	0.00495401	0.000993306	0.00114288	-0.000945411
	a611	-0.0153722	-0.0196665	-0.24633	0.0984281	0.0303421	-0.206222	0.0298089	0.736659	1.42854	-0.433327	-0.178277	0.155947	0.144051	0.112482	-0.358719	0.213601	-0.407756	-0.053253	0.0523379	-0.106267	-0.102675	0.0704761	0.246914	-0.158127	-0.149028	0.130084	0.0225857	0.310025	10.1781	-0.293166	-0.485465	-1.32034	0.526013	-0.0104876	-0.636428	1.59444	0.292902	5.99411	17255.1	55.3212	-1.0041	0.171416	-0.00549203	0.00662358	-0.00784092	-0.000166334	-0.00134815	0.00313386
	a612	0.0517043	0.061934	1.59538	-0.0562045	0.232789	0.229474	-0.360763	-0.565749	-1.04395	0.833718	0.217236	0.064397	-0.584734	-0.218256	0.602403	-0.00293073	0.464115	0.0841854	0.00808879	0.224739	-0.00397976	0.0258894	-0.187076	0.403727	0.227264	0.0100641	-0.386357	-1.05581	-1.47906	3.30314	1.75785	3.64361	-1.92803	0.661229	0.532096	-2.40526	0.342208	-7.81663	55.3212	17487.6	1.89028	0.970667	0.00425885	-0.00494083	0.0157733	-0.00538082	0.000728226	-0.0132175
	a613	-1.1064	1.59423	-3.92972	2.50731	-0.848777	1.56878	18.1202	-1.05496	-0.230017	-0.738632	-0.387766	-0.396896	2.40699	-0.685837	0.0795232	0.955461	0.638571	0.815988	-0.249269	0.526372	1.48265	0.119696	-1.17429	0.104991	0.0106002	-0.294971	0.402222	-1.13286	-5.67126	1.57501	15.3652	4.51339	-0.864263	0.876267	5.69956	-2.05558	-2.47946	-1.0101	-1.0041	1.89028	17273.8	-4.81198	0.00525786	-0.0088959	-0.00732356	0.0120261	0.00642374	0.0158181
	a614	0.720305	-0.763277	1.05124	-3.28498	0.412901	-3.6046	-4.61681	-0.0942355	-3.46709	0.0833136	0.391514	-0.909999	-0.057839	0.534904	0.238315	-0.607004	-0.115108	-0.415279	-0.00845538	-0.315579	-0.211133	-0.00344215	0.0605138	0.0193854	0.163827	-0.178758	0.161952	0.287603	-0.2087	-0.0848075	-2.4978	-1.74505	-0.221379	-0.206375	-0.644666	0.454139	0.580209	0.0316736	0.171416	0.970667	-4.81198	17124.7	0.011856	-0.00697683	0.00387598	-0.0110288	-0.00592674	-0.00295439
CP29	a601	-0.00508088	0.00823957	-0.0124523	0.0273646	0.0137739	0.00890574	0.00319344	0.00312488	0.00677294	-0.0243038	0.000341016	0.0174062	-0.0278213	-0.0457015	0.0105663	-0.024318	0.00918869	-0.0063774	-0.0106531	0.00983636	0.00415509	0.00367874	-0.0242705	0.018574	0.00837974	-0.0179971	0.00238485	0.00954856	-0.0111349	0.00182607	-0.0163825	-0.00976526	-0.000411746	-0.00405734	-0.00243931	0.0123152	0.00792873	0.00517211	-0.00549203	0.00425885	0.00525786	0.011856	17146.3	7.17329	-8.33039	-2.31386	-1.14221	-0.401622
	a602	-0.0094166	0.000303387	0.00540901	-0.0346323	-0.0100881	-0.0169364	-0.00850438	0.00867887	0.00293522	0.0114352	-0.0157336	0.00441431	0.0204352	0.0382314	-0.00416402	0.0189591	-0.00433122	0.00628485	0.0119702	-0.000747827	-0.00636299	-0.00165306	0.0157295	-0.00555284	-0.00345909	0.0124133	-0.00395168	-0.00930798	0.0136774	-0.00300091	0.0192231	0.00316824	-0.000364777	0.00262956	-0.00143589	-0.0105813	-0.00659462	-0.00633412	0.00662358	-0.00494083	-0.0088959	-0.00697683	7.17329	17271.5	26.3786	6.48337	2.94069	3.87516
	a603	0.0165941	0.00058257	0.0140263	0.0122162	0.0137107	0.0120783	-0.00649944	-0.0107816	-0.00391102	0.0149444	0.0274892	0.00209545	-0.031084	-0.00233354	-0.00109004	-0.00750465	0.00494971	-0.0183987	0.00168697	-0.0144842	-0.00664145	-0.00145987	-0.000272825	0.00689337	0.000212443	0.0032515	0.00139437	0.0133392	-0.0156073	0.00579681	-0.0120231	-0.00521167	0.0076988	-0.0031108	-0.00630512	0.00965626	0.00913432	0.00495401	-0.00784092	0.0157733	-0.00732356	0.00387598	-8.33039	26.3786	17254.5	3.53088	-2.66666	-23.0089
	a604	0.0139601	-0.0157289	0.00228014	0.0136335	-0.0105958	0.0110717	0.0140192	-0.0145643	-0.0134586	0.00962236	0.0100702	-0.034254	0.0223045	0.00530592	-0.00731748	0.00609742	-0.00643725	0.0079665	-0.00427568	-0.00598364	0.0100831	-0.00130286	0.00855637	-0.0189607	-0.00824946	0.00280794	0.00232099	-0.0037843	0.00019566	-0.00081084	-0.00349585	0.0116477	-0.00250336	0.00384919	0.00933334	-0.00481425	-0.00394758	0.000993306	-0.000166334	-0.00538082	0.0120261	-0.0110288	-2.31386	6.48337	3.53088	17190.6	36.1027	30.2413
	b606	0.0153684	-0.0074299	0.00774798	0.011385	-0.00535461	0.0118948	0.00876502	-0.0156714	-0.0127596	0.015564	0.0149696	-0.0280401	0.0106695	0.00936476	-0.00704753	0.00518964	-0.00378146	-0.000134281	-0.00179183	-0.0091322	0.00258607	9.02615e-05	0.00904864	-0.0137508	-0.00405608	0.00510104	0.00104975	0.000532915	-0.00464062	0.0016266	-0.004665	0.00835223	0.000825111	0.000943842	0.00518587	-0.00121058	-0.00124773	0.00114288	-0.00134815	0.000728226	0.00642374	-0.00592674	-1.14221	2.94069	-2.66666	36.1027	18148	9.1353
	b607	-0.00339742	-0.00520244	-0.0141888	0.0139772	-0.0103641	0.00276475	0.0157991	-0.000275013	-0.0029953	-0.0153285	-0.0105894	-0.0184582	0.0249818	-0.0159601	0.000420233	-0.00072358	-0.0056781	0.0144146	-0.0098399	0.00983031	0.0124315	0.00110812	-0.00418025	-0.0102475	-0.00113786	-0.00769088	0.00207727	-0.00776758	0.00647205	-0.00414367	-0.000749414	0.00688893	-0.00738266	0.00225296	0.00960043	-0.00426815	-0.00590643	-0.000945411	0.00313386	-0.0132175	0.0158181	-0.00295439	-0.401622	3.87516	-23.0089	30.2413	9.1353	18074
	b608	-0.0173057	0.00983762	-0.00841456	-0.0167389	-0.000821896	-0.014713	-0.00626661	0.0167086	0.011571	-0.0141905	-0.0203958	0.0222536	0.00214872	0.000446584	0.00480838	0.00119767	0.00345299	0.00477162	0.0029416	0.00996502	-0.00139329	0.000532608	-0.00396454	0.00818133	0.00278596	-0.00215106	-0.00427941	-0.00454841	0.00891448	-0.00278075	0.0096653	-0.00439081	-0.00255816	0.000191411	-0.00266885	-0.00330857	-0.00188302	-0.0052497	0.0040551	-0.00547172	-0.00417656	0.00279345	1.05589	-3.98123	3.14716	-4.86384	-1.04534	-0.360603
	a609	-0.0231428	0.0106357	-0.0050176	-0.0341138	-0.00029533	-0.0232364	-0.0137871	0.0223704	0.015309	-0.0100119	-0.0279495	0.034358	0.00148431	0.0137658	0.00477191	0.00563112	0.0030139	0.00408222	0.0084627	0.00987379	-0.00691381	0.00143938	-0.000590481	0.0115711	0.00312799	0.00166254	-0.00487054	-0.00570854	0.0126296	-0.00303174	0.0161816	-0.00621704	-0.00121066	-6.27451e-05	-0.00596368	-0.00501012	-0.00266574	-0.00557677	0.00594014	-0.00396548	-0.0114188	0.00226678	3.67077	-22.4212	133.954	8.92823	24.8024	58.6767
	a610	0.00951549	0.00193243	0.00911201	0.00855044	0.010581	0.00812145	-0.00531489	-0.00664169	-0.00149073	0.00932971	0.0173736	0.00483503	-0.0243348	-0.00532894	0.00075665	-0.00765689	0.00527133	-0.013546	0.000438439	-0.00808507	-0.00496226	-0.000103341	-0.002716	0.008301	0.00192155	0.000321286	0.000682143	0.0106613	-0.0119852	0.00429993	-0.00938484	-0.0055562	0.00581803	-0.00264453	-0.00552302	0.00829892	0.00765408	0.00361203	-0.00606416	0.0125345	-0.00581626	0.00437641	0.67651	-5.01348	8.8915	1.21141	-1.19994	-3.72657
	a611	0.0112582	-0.00309413	0.00492558	0.0140483	0.00311586	0.01045	0.00285332	-0.00940403	-0.0057024	0.00591281	0.0141015	-0.00817425	-0.00977335	-0.00794276	-0.00170866	-0.00508232	0.00108028	-0.00640086	-0.00315943	-0.00687644	0.000477415	-0.00101618	-0.00111956	-0.00111292	-0.000698932	-0.00046817	0.004381	0.00608212	-0.00819634	0.00114685	-0.00923127	0.000626872	0.00268646	-0.00162631	0.000378475	0.00465775	0.00322049	0.00620846	-0.0027936	0.00578279	0.00191797	0.000325536	20.3712	-4.8631	-0.668397	-2.50196	-0.891966	-0.823243
	a612	-0.00570725	0.00211891	0.00259161	-0.0178813	-0.000863998	-0.00956214	-0.00633995	0.00624942	0.00345538	0.00385008	-0.0102495	0.00807912	0.00413846	0.0165263	-0.00111737	0.00774169	-0.00102329	0.00113153	0.00744815	-0.000245039	-0.00557359	-0.000142925	0.00603837	0.000455574	-0.00127947	0.00580161	-0.000266837	-0.00312825	0.00547581	-0.00189834	0.00925978	-0.000706399	0.000581773	0.00087164	-0.00246141	-0.00518068	-0.00243762	-0.00327162	0.00330074	-0.00105281	-0.00672347	-0.00213326	-5.12853	6.74621	1.03599	3.15751	0.908015	-0.116075
	a613	-0.0161091	0.00639154	-0.0245955	0.0224167	0.00520141	0.0013902	0.00937346	0.00993542	0.00936242	-0.036161	-0.0181658	0.0117809	-0.00321382	-0.0475819	0.0123419	-0.0201266	0.00458371	0.0100911	-0.0139168	0.0223459	0.0114192	0.00488827	-0.0253168	0.0124499	0.0083514	-0.0225763	0.00178896	-0.00110202	-0.000131536	-0.00230786	-0.00860858	-0.00649068	-0.00721344	-0.00177732	0.00292029	0.00543705	0.00117502	0.00184686	0.000409871	-0.00821526	0.0124354	0.00999892	-3.9891	1.02524	2.75061	2.90752	0.550312	2.31386
	a616	-0.00698405	-0.00101532	0.00603619	-0.0301536	-0.00619272	-0.0138687	-0.00634691	0.0054052	0.00142277	0.0127433	-0.0160154	0.00275984	0.0181984	0.0335922	-0.00446166	0.0159566	7.8807e-05	0.00400573	0.0162933	-0.00227889	-0.004415	-0.000138235	0.0142346	-0.00543942	-0.00400839	0.0108126	-0.0018323	-0.00624998	0.00978911	-0.00294401	0.0153936	0.00318551	0.000350371	0.00188267	-0.000775183	-0.00794404	-0.00405958	-0.00803402	0.00888952	-0.0032273	-0.00739891	-0.0038718	0.975103	-5.16263	-2.17829	-0.560193	0.638442	3.60952
CP26	b601	-0.115566	-0.0223653	-0.0464747	-0.113641	-0.0348615	-0.0557892	-0.0392283	0.00627813	0.0311966	0.157185	0.228174	-0.30322	0.302953	0.691085	0.192794	-0.0170928	0.0110639	0.322686	1.30209	0.568362	-0.15903	0.186917	0.0570705	0.664776	0.215691	-0.377933	-0.0924899	-0.0914087	0.0808977	-0.0376414	0.173253	-0.0750915	-0.0356362	-0.00748989	-0.0580207	-0.0238364	-0.0446047	-0.0364911	0.0394465	-0.0552956	-0.0551069	-0.00206357	-0.0427793	0.0204773	0.00190051	0.0232384	0.0207173	0.000219179
	a602	-0.487486	0.271515	-0.0403332	-0.0328156	0.0223018	-0.0269424	-0.0463644	0.0909757	0.083473	-0.144986	-0.333209	0.33198	-0.276329	-0.0534943	-0.0167037	-0.138887	0.353282	-0.406679	-0.11136	-0.108795	-0.126766	-0.135874	-0.271284	0.471512	-0.030013	0.157251	0.0481511	0.137612	-0.0217532	0.0233696	-0.0611998	-0.0148985	0.0439706	-0.00931655	-0.0306031	0.0420841	0.0478359	0.0254165	-0.0241111	0.0437987	-0.0401739	0.0318194	0.0198035	-0.00848803	0.00847056	-0.0141324	-0.0131561	-0.0103452
	a603	0.236445	-0.0679022	0.112861	-0.0253525	-0.0160132	0.0120819	-0.0163042	-0.0318325	-0.0316175	0.131501	0.267364	-0.102057	-0.0304537	0.106114	0.0266801	0.214083	0.0049591	-0.377267	-0.200568	-0.698766	-0.113547	0.0116727	0.361992	-0.109971	0.047783	0.253934	-0.0824114	-0.0511336	0.0203355	-0.0120841	0.114152	-0.00652125	0.00773775	0.0146742	-0.03555	-0.0547412	-0.0354142	-0.0218749	0.0111855	0.000543368	-0.0489628	-0.0289064	-0.0179317	0.0108742	0.00385046	0.00613023	0.00498626	-0.00634288
	a604	0.178566	-0.0108254	-0.0667166	-0.0228307	-0.0112981	-0.0256939	0.0182801	-0.00746252	-0.00541592	0.0120809	0.117012	-0.104923	0.227454	0.126256	0.0790761	-0.0642238	0.118253	0.568861	-0.37684	-0.358964	0.00238633	-0.13548	0.094768	-0.897355	-0.0197498	-0.854339	-0.12173	-0.417966	0.0250331	0.0562304	0.0255461	-0.0402137	-0.0909751	-0.00601274	0.0228325	-0.0139831	-0.0536681	-0.0114532	0.0408939	-0.0645514	0.0322307	0.00638776	-0.00203168	-0.00191757	0.00137968	0.00380276	0.00188653	0.00141477
	b606	0.144973	-0.0981505	0.0160394	-0.0342005	-0.0117875	-0.0166351	-0.00905251	-0.00625798	-0.00593909	0.0516384	0.0801757	-0.0656499	0.0524671	0.0986489	0.0963097	0.126424	-0.128078	0.027548	-0.101766	-0.541969	-0.0631038	0.0781488	0.245454	-0.749626	0.148078	-0.299504	-0.122425	-0.298712	0.0354455	-0.0632325	0.121907	-0.0478686	-0.0614326	0.00410953	-0.0222396	-0.0555463	-0.0447397	-0.0109207	0.0282324	-0.0493194	-0.027777	-0.00128392	-0.0061209	0.00135048	0.00380026	0.00584017	0.00588152	-0.00200019
	b607	0.257797	-0.0979384	-0.0430525	0.0462872	-0.0259885	0.0134437	0.0765258	-0.0543693	-0.058569	0.0191917	0.186428	-0.17867	0.302086	-0.0392209	-0.0682235	-0.0401425	-0.102634	1.06238	-0.832508	0.0514942	0.303682	-0.0124727	0.00501292	-0.752188	-0.101576	-0.263328	0.0221904	-0.271257	0.00530993	-0.00690687	-0.0740508	0.0423921	-0.109425	0.0208353	0.125447	-0.0198709	-0.0533046	0.0155734	0.005675	-0.06629	0.117914	-0.00569407	-0.00199263	-0.00568595	-0.00289484	0.0122715	0.00784972	0.00998835
	b608	-0.769967	0.194111	-0.149486	-0.0188861	0.0394913	-0.033325	-0.037829	0.112313	0.114944	-0.205165	-0.461901	0.323569	-0.19527	0.04478	-0.125805	-0.583343	0.222067	-0.349592	1.09877	0.815891	-0.107253	0.283575	-0.720993	3.11746	-0.144803	-0.340805	0.0993953	0.344928	-0.0597482	0.024999	-0.220851	0.0211135	0.0612243	-0.0102352	0.019951	0.110987	0.137073	0.0483806	-0.0270576	0.0692989	0.00131249	0.0453687	0.0194867	-0.0074301	0.00114987	-0.0141398	-0.01404	-0.0033238
	a609	-0.576394	0.138449	-0.108745	-0.0427326	0.0363976	-0.0462705	-0.0586569	0.11293	0.117216	-0.166745	-0.366098	0.293992	-0.20471	0.0301589	0.0581316	-0.288134	0.253329	-0.44816	0.570605	0.566435	-0.150351	0.291721	-0.405955	1.54921	0.106132	-0.113655	0.0745061	0.306591	-0.0180537	0.00361223	-0.0694071	-0.0411523	0.0738205	-0.0357117	-0.0542124	0.0841691	0.0938772	0.0281238	-0.021228	0.054113	-0.0489945	0.0582238	0.0199382	-0.00724363	0.00385394	-0.0158981	-0.0116346	-0.00692018
	a610	2.01135	-0.279835	0.525173	0.0703441	-0.0474392	0.117427	0.04268	-0.195156	-0.216051	0.490436	1.08963	-0.494939	-0.00676811	-0.489733	0.118548	1.12808	-0.287375	-0.387941	-3.58138	-3.04565	0.272756	-1.0358	2.3121	-0.202388	0.249331	1.27888	-0.0711528	-0.149477	0.028911	0.00804552	0.364638	0.0210554	0.0335631	0.0230974	-0.0648938	-0.130557	-0.10352	-0.0635356	0.0251134	0.0151463	-0.0636743	-0.104341	-0.0292245	0.0215468	-0.00270209	0.00667235	0.00846819	-0.00452842
	a611	-0.266957	-0.0528342	-0.13089	-0.205988	-0.0651656	-0.105225	-0.0937547	0.00719048	0.0809879	0.370081	1.02321	-0.817064	0.675627	1.50595	0.494339	-0.280541	0.124407	0.0577417	4.32395	1.27337	-0.649317	1.14559	-0.135439	2.92195	0.562273	-1.11485	-0.201652	-0.0821168	0.165193	-0.0889562	0.365972	-0.179578	-0.0550752	-0.0330482	-0.154922	-0.0152756	-0.0610744	-0.064643	0.0710621	-0.104558	-0.137785	0.0112044	-0.0483995	0.0259793	-0.00430189	0.0258672	0.0224657	0.00297373
	a612	-3.327	0.77465	0.0198899	-0.0899627	0.106391	-0.0408242	-0.149285	0.280938	0.239437	-0.48743	-2.03659	1.32832	-1.52649	-0.204074	-0.287387	-0.0981757	0.68123	-3.84285	-13.6163	-6.38466	-0.418572	0.227644	-1.30337	1.39459	-0.389926	2.19041	0.137896	0.373941	-0.0961717	0.071183	-0.200461	0.0485737	0.161861	-0.00644802	-0.0568135	0.0870938	0.196798	0.0429725	-0.0527983	0.17423	-0.145788	0.0439141	0.0291282	-0.012792	0.0176957	-0.0259873	-0.016625	-0.0191681
	a613	1.44078	-0.324453	0.341866	0.259885	-0.0640618	0.189741	0.20875	-0.269765	-0.288627	0.337514	1.01461	-0.592305	0.261781	-0.769423	-0.320462	0.438861	-0.274246	0.0974058	-4.30357	-2.7633	0.541323	-0.431113	0.980106	-1.27002	-0.331428	0.660343	0.104041	-0.1477	-0.0722715	0.0450003	-0.100869	0.198715	-0.0294339	0.0578795	0.186962	-0.0771792	-0.0588784	0.0147292	-0.0225979	0.0071224	0.183864	-0.111298	-0.00267756	0.00202545	-0.0300241	0.0123828	0.000776261	0.0283464
	a614	0.173708	0.0223186	0.534595	-0.0485458	-0.0394465	0.125809	-0.0592786	-0.129351	-0.135563	0.500971	0.574633	-0.0107808	-0.577921	1.69516	-0.0583735	0.389085	-0.0170148	-0.353227	5.27993	-2.50078	-0.977145	-0.00270699	0.897946	0.30483	-0.0292179	0.31825	-0.0644668	-0.112103	-0.00309425	0.0449909	0.222984	0.0743623	0.0431492	0.0491275	-0.0444029	-0.105121	-0.0337222	-0.0333195	0.00356855	0.0709271	-0.168824	-0.176622	-0.0167088	0.0300179	-0.0188248	-0.0183817	-0.0124085	-0.00710879
CP47	a602	-0.00644697	-0.00515597	-0.0101575	-0.00523781	-0.019746	-0.00537125	0.0112636	0.0018263	-0.00277385	-0.00526209	-0.016231	-0.0189242	0.0376262	0.00411288	-0.00177964	0.00812824	-0.00618025	0.019007	-0.00552104	0.0108535	0.0135358	0.000304357	0.00411237	-0.014558	-0.00258956	-0.00280493	-0.000770123	-0.0125504	0.0122709	-0.00343668	0.00772215	0.00857341	-0.00787809	0.00305678	0.00936669	-0.00862359	-0.00880768	-0.0030769	0.00468991	-0.014632	0.0118099	-0.00759602	-1.32963	3.54857	2.76079	3.74781	2.54451	-2.80825
	a603	-0.0190164	0.0198408	-0.0269994	0.0409761	0.0417943	0.00541179	-0.00425843	0.0189277	0.0227137	-0.0608247	-0.00834206	0.0542412	-0.0665657	-0.0931559	0.0216054	-0.0423819	0.0168355	-0.0151175	-0.0153648	0.0200612	0.00128921	0.00411839	-0.0476341	0.0406665	0.0150093	-0.0298532	0.000839141	0.0166407	-0.0151654	0.00399472	-0.0228339	-0.0235192	0.000588639	-0.011442	-0.0106802	0.0200565	0.0135058	0.00562742	-0.00928788	0.00749429	0.000741983	0.0246241	-1.01565	1.20065	3.18291	0.304559	1.021	-4.96004
	a604	0.0169374	-0.0214827	0.00567667	0.0205072	-0.00143323	0.0147084	0.00858107	-0.0158043	-0.0114333	0.0114393	0.010761	-0.0289502	0.00566197	0.00106583	-0.00472929	0.00110692	-0.00522242	-0.00388988	-0.0023839	-0.00993309	0.00880987	-0.00557023	0.00596732	-0.0104864	-0.00550909	0.00269204	-0.00217236	0.00230785	-0.00877191	0.00147596	-0.007583	0.00569203	0.000770717	0.000170886	0.00451826	0.00139061	-0.000471835	0.000136399	-0.00431566	0.00160214	0.00693464	-0.00674599	-0.491867	0.482071	0.363099	1.08681	0.772458	0.682686
	a605	-0.0284059	0.000275368	0.000106275	-0.0694953	-0.0200372	-0.0354954	-0.00823439	0.019043	0.00649717	0.0130435	-0.0431731	0.0165125	0.0527824	0.0534378	-0.00449306	0.026273	-0.00289016	0.0194908	0.0130083	0.0119174	-0.00215289	-8.07686e-05	0.0179632	-0.00963978	-0.00211069	0.00997535	-0.00493116	-0.0175755	0.0255296	-0.00615738	0.030597	0.00846394	-0.00503487	0.00557741	0.00360617	-0.0169235	-0.0118688	-0.0102895	0.0133985	-0.0136068	-0.00648096	-0.0107963	0.553728	-0.652527	-0.138956	-0.355916	-0.81549	0.597249
	a606	-0.00457204	0.0100558	-0.0400662	0.0878702	0.0280315	0.0252507	0.0210656	0.00622296	0.0122867	-0.0739941	0.0055947	0.00927798	-0.0471865	-0.12141	0.0205609	-0.0473564	0.0130315	-0.00431925	-0.0285436	0.0219728	0.0181126	0.00708025	-0.0511176	0.0255127	0.014648	-0.0379054	0.00586055	0.0129886	-0.0167095	0.000465026	-0.033159	-0.0162037	-0.00607213	-0.0063433	0.00085293	0.0195952	0.0108472	0.00887633	-0.0071548	-0.00380515	0.0231899	0.0259728	-0.360072	1.06375	-2.22865	0.319194	0.0179586	2.56902
	a607	0.0109316	-0.0119226	0.0128825	-0.0103756	-0.00147678	0.00288991	3.78813e-05	-0.0102091	-0.0100999	0.0244002	0.0159112	-0.0200877	0.0161266	0.0313561	-0.00839289	0.0134594	-0.00735996	-0.000631189	0.00627879	-0.0114041	-0.000398912	-0.00670855	0.0170224	-0.013744	-0.0152709	0.0118759	0.000119937	-0.00170509	0.00123602	-0.000376624	0.0046269	0.00777501	0.00252763	0.00536972	0.00253969	-0.00379297	-0.00318505	-0.00161215	0.00124438	0.00165942	-0.00195116	-0.00794158	-0.24321	0.21574	-0.0566816	0.979382	2.26074	-1.33445
	a608	0.0659788	-0.0343905	0.0228967	0.102497	-0.00765497	0.0726558	0.0423558	-0.0695043	-0.0484026	0.0520041	0.08135	-0.129735	0.0174873	0.015773	-0.0159408	0.00209776	-0.0137909	-0.00926937	-0.00724946	-0.0362931	0.0120207	-0.00709695	0.0224772	-0.0353048	-0.0115298	0.00904597	0.00953777	0.0110141	-0.0279939	0.00723006	-0.0317466	0.0183026	0.00396825	0.000990383	0.0147469	0.00732248	0.00309574	0.0115148	-0.0141094	0.00786403	0.0295387	-0.0118221	-0.412982	0.420092	-0.144331	0.413813	0.553631	-0.0405183
	a609	0.0571787	-0.0340634	0.0679496	-0.0495094	-0.0312115	0.00822246	-0.00384667	-0.0465739	-0.0414773	0.132337	0.063147	-0.0994589	0.0685388	0.170735	-0.0351625	0.0634348	-0.0252291	-0.00104805	0.0332698	-0.0569529	-0.0157596	-0.014981	0.08474	-0.0553348	-0.0261957	0.0568289	-0.00182412	-0.01036	0.0040781	0.00371547	0.0246249	0.0279439	0.0098793	0.00849554	0.00575321	-0.0202029	-0.011013	-0.00511407	0.00127407	0.0106881	-0.0145129	-0.0361856	1.11986	-1.28781	0.789895	-0.883247	-0.694148	-0.836815
	a610	0.00268813	-0.00346652	-0.000839838	0.00693389	0.00139331	0.00240017	0.00471986	-0.00316311	-0.00101704	-0.000426925	0.00414143	-0.0044729	-0.000974048	-0.00529181	-5.55889e-05	-0.001782	-0.000495962	-0.000853066	1.01137e-05	-0.000806634	0.00443422	-0.00121379	-0.000786642	-0.00094532	-0.00158934	-0.000974739	0.00520856	0.00183227	-0.00433371	-0.000117411	-0.0027989	0.000536881	-0.000131171	-0.000770318	0.00122864	0.00222551	-0.000539486	-0.00220523	-0.00221954	0.000475357	0.00226707	0.00185376	-0.112762	-0.0786708	0.211376	0.0311748	0.0174114	0.0849787
	a611	0.0162155	-0.000332622	0.0136001	0.000217468	-0.00241716	0.00667148	-0.0013422	-0.0122386	-0.00855832	0.0223756	0.00808063	-0.0173929	0.00159844	0.0199257	-0.00602501	0.00648603	0.00244	-0.00631291	-0.000145332	-0.0137365	-0.002116	-0.0128929	0.0119781	-0.00885714	-0.0117839	0.00876873	-0.000385695	0.00322176	-0.00350043	0.0108247	-0.0012465	0.00349453	0.00350729	0.00217861	0.000335799	-0.000365971	0.000658587	0.000369902	0.00165878	0.00571476	-0.00304503	-0.00715934	-0.0906107	-0.346717	1.51766	-0.27385	-0.0560847	-0.822523
	a612	-0.0419118	0.054288	-0.037771	0.0137835	0.0651738	-0.0200075	-0.0363196	0.0622693	0.0582151	-0.114358	-0.0179328	0.172298	-0.146419	-0.119037	0.0363321	-0.067076	0.0399639	-0.0377582	-0.00764459	0.0234921	-0.0165788	0.0117475	-0.0764482	0.079823	0.0282509	-0.0394028	-0.00226747	0.0275139	-0.0197186	0.00463033	-0.0256046	-0.0444423	0.0037733	-0.0139306	-0.026716	0.030783	0.0250429	0.00715714	-0.00783809	0.0151061	-0.0221578	0.0468853	-0.538592	0.968749	-1.17848	0.400193	0.389811	0.619313
	a613	-0.0399648	-0.000524346	-0.0179351	-0.0513446	-0.0365404	-0.034014	0.006653	0.0252693	0.00711151	-0.0145132	-0.0718618	0.00431176	0.0722098	0.0257514	-0.00238255	0.0253447	-0.0151249	0.0317836	0.00352454	0.0251632	0.00786497	0.00183971	0.0105825	-0.0116197	-0.00466242	0.00284486	-0.00592856	-0.0247607	0.0356779	-0.00762127	0.033123	0.0117807	-0.0106485	0.00576609	0.00911951	-0.021725	-0.0169585	-0.00959046	0.0235004	-0.0264063	0.00611173	-0.0138179	0.871552	-1.12161	0.901015	-0.767516	-0.83692	-0.509803
	a614	0.0570048	-0.00479254	0.0288795	0.0684212	0.0459444	0.0486141	-0.0060576	-0.0409018	-0.016242	0.031669	0.0982746	-0.0266702	-0.0810401	-0.0132248	-0.00150661	-0.0238871	0.0101601	-0.0394332	2.5112e-06	-0.0365147	-0.0113554	-0.00352571	-0.00338176	0.00751073	0.000743245	0.00235578	0.00543796	0.0292693	-0.0453496	0.0138732	-0.0388404	-0.0110087	0.0141544	-0.00736744	-0.0104317	0.0243297	0.020933	0.0139606	-0.0211178	0.0330255	-0.00805541	0.0136951	-0.632562	0.731764	-0.144708	0.401487	0.622883	-0.240203
	a615	0.0118189	0.0301969	0.0187214	-0.011178	0.0638766	-0.00484195	-0.0469784	0.016443	0.0271357	0.00150436	0.0538856	0.0957189	-0.120863	-0.0117347	0.0153284	-0.0359557	0.0285991	-0.0448589	0.00961556	-0.01615	-0.0277049	0.00195392	-0.0245747	0.0483111	0.0135326	-0.00648687	-0.00246342	0.0296147	-0.0339134	0.0121528	-0.0220201	-0.033157	0.0141382	-0.0113518	-0.0277458	0.0272325	0.0255564	0.00824287	-0.014991	0.0358581	-0.0374176	0.0302957	-0.354404	0.62767	-0.746902	0.153523	0.131801	0.403856
	a616	-0.00490609	0.0211228	-0.0166116	0.043404	0.0411079	0.0115403	-0.00888212	0.0123491	0.0200301	-0.0456601	0.015471	0.0543062	-0.0804262	-0.0777244	0.0200356	-0.0444118	0.0215092	-0.0224462	-0.0116818	0.00897167	-0.00283232	0.00561833	-0.0430811	0.0405495	0.0158806	-0.0263483	0.00210475	0.0211172	-0.0236716	0.00520575	-0.0280789	-0.024782	0.00305376	-0.00903392	-0.0124848	0.0239777	0.018074	0.00861625	-0.0106968	0.0139726	-0.00358369	0.028322	-0.881968	2.7851	-9.49241	2.21117	2.26976	6.5274
	a617	0.00478849	-0.00245686	0.0309391	-0.061887	-0.00928635	-0.0198347	-0.0220754	-0.000285947	-0.00300321	0.052138	0.00310612	0.00563489	0.0138491	0.0763693	-0.0118323	0.02819	-0.00416822	-0.00563659	0.0197964	-0.0177575	-0.0155395	-0.00772655	0.0321063	-0.00829121	-0.00652658	0.0264952	-0.00336477	-0.00288651	0.00653127	0.00119385	0.0208333	0.00388398	0.007792	0.00166914	-0.00700678	-0.00844931	-0.00260534	-0.00467792	0.00212261	0.0106172	-0.0234086	-0.0115892	-0.213072	0.130509	1.00884	-0.408192	-0.122902	-0.483124
CP43	a502	0.0102106	-0.0198054	-0.0370621	0.0437548	-0.0101839	-0.00155485	0.0266562	0.00407765	0.0134919	-0.0692303	-0.113909	-0.0154231	-0.0172989	-0.27693	0.00428029	-0.0269506	0.0369824	0.0156063	-0.0115599	-0.0150824	-0.00449686	-0.0167288	-0.0266446	-0.0077447	-0.0239845	-0.0175773	0.0398795	0.018984	0.00133279	0.000262339	-0.0204305	-0.00548432	-0.00578471	-0.00590126	0.00243586	-0.000639696	0.0212714	0.0240002	-0.00670869	-0.00437402	0.015987	0.0218512	-0.0044858	-0.000927188	0.00325269	-0.00078253	-0.00583603	-0.00146632
	a503	0.888113	-0.126573	0.296403	0.300945	0.0301388	0.181643	0.102347	-0.156858	-0.169684	0.111494	0.827358	-0.207621	-0.367498	-0.677851	-0.195444	0.250436	-0.0770676	-0.410263	0.656641	-1.69072	-0.0676843	-0.303647	0.648291	-0.355114	-0.226352	0.462638	0.0362631	0.0368246	-0.0975324	0.0755727	-0.0810299	0.115108	0.050031	0.0194317	0.0525877	-0.0160121	0.0116502	0.0166509	-0.0331215	0.0724708	0.0471472	-0.0557102	0.0713165	-0.0508807	-0.00501905	-0.0188834	-0.0232783	0.0199512
	a501	-0.0626957	-0.0134315	0.116868	-0.112531	-0.0999812	0.0252154	-0.00737722	-0.0806804	-0.064073	0.368144	0.190905	-0.268247	0.553448	2.36025	-0.00141852	0.0780748	-0.0496448	0.0923972	-0.139135	0.285386	0.0411573	0.0517598	0.140252	-0.0149954	-0.0131321	-0.0261527	-0.0171666	-0.0942112	0.0169915	0.038993	0.0752047	0.0256456	-0.0143953	-0.00716588	0.0159254	-0.0281962	-0.0344122	-0.0363282	0.00602081	-0.0126101	-0.00779862	-0.0961723	-0.00773485	0.0111329	-0.0177399	0.00175678	-0.00114612	0.00811016
	a504	0.197823	-0.118355	0.215202	-0.109499	-0.107733	0.0484575	0.026706	-0.150714	-0.133872	0.492996	0.371795	-0.468072	0.426478	1.27714	-0.0682994	0.200815	-0.0970275	0.16744	0.149651	-0.109822	-0.0181823	-0.0377077	0.332431	-0.162649	-0.053337	0.107235	-0.0116734	-0.0924355	0.0316443	-0.000924964	0.101031	0.0785959	-0.0119092	0.029239	0.0420066	-0.0689794	-0.0554767	-0.022358	0.0153787	-0.0102141	-0.0046391	-0.104154	-0.0140886	0.0357093	-0.0911467	0.0085045	-0.0133102	0.0556559
	a505	-0.939239	0.661533	-0.409525	-0.772142	0.107601	-0.429181	-0.375828	0.741266	0.542785	-1.73276	-2.13352	4.8621	-1.47239	-0.0412474	0.177802	-0.388749	0.304882	-0.33718	0.086189	0.0638765	-0.278851	0.0860098	-0.725275	0.472418	0.135591	-0.184418	-0.0318059	0.107417	0.0530044	-0.0205686	-0.0349203	-0.178991	0.0121851	-0.04965	-0.14132	0.0921041	0.0916512	0.00202537	0.0198358	0.00747521	-0.217553	0.161409	-0.097695	0.0962011	-0.0338537	0.0162448	0.0184756	-0.014343
	a506	1.29248	0.910927	-1.19365	-1.04337	0.496856	-0.685726	-0.673563	1.36172	1.05533	-5.3774	-8.60868	21.5175	-7.18032	4.91619	0.133607	-0.688309	0.412056	-0.856581	0.235195	-1.35994	-0.497163	-0.0317568	-1.06361	0.11967	0.0671084	-0.0509076	0.0325827	0.280789	-0.0650412	0.00891729	-0.419164	-0.241362	0.0566568	-0.112307	-0.188919	0.209707	0.200935	0.061755	-0.0402913	0.0497592	-0.284998	0.354099	-0.0336786	0.0095781	0.027133	0.019431	0.0250446	-0.0182059
	a507	-1.9969	0.172807	0.00322665	-0.345383	-0.220583	-0.0653173	-0.00688615	-0.143796	-0.0283767	1.318	-1.93409	-2.27327	1.4002	2.16106	0.130725	-0.0336553	0.0916631	0.157552	0.154682	1.02207	-0.13573	0.0824448	-0.500412	0.497471	0.103788	-0.238769	-0.097622	-0.0907607	0.167011	-0.0401384	0.25466	-0.0234752	-0.0399883	0.00963825	-0.0251021	-0.0625206	-0.0606359	-0.0761552	0.0531805	-0.0703514	-0.0545616	-0.0958747	-0.0390317	0.0550444	-0.0522409	-0.00144108	-0.0074944	0.0135031
	a508	0.782057	-0.201775	0.388247	0.092672	-0.0173774	0.159289	0.0379335	-0.228862	-0.205231	0.608572	1.31924	-0.81065	0.28092	1.04384	-0.145994	0.26896	-0.120471	-0.00315884	0.156673	-0.512892	-0.0311911	-0.107455	0.59124	-0.292935	-0.11413	0.280928	0.00617534	-0.0193415	-0.0640724	0.0408512	0.0265574	0.0949889	0.0403426	0.0247217	0.029323	-0.0395383	-0.0137713	-0.000188307	-0.0248186	0.0729277	-0.0201081	-0.0958272	0.119645	-0.0727099	0.0604736	-0.0852127	-0.0620399	-0.0589602
	a509	-0.109839	-0.00934468	-0.045944	-0.0137109	-0.0299211	-0.0232545	-0.0350319	0.0283639	0.0388436	-0.126705	-0.850614	0.199193	-0.112226	-0.113941	0.0153128	-0.0493571	0.0634839	0.0485409	-0.00807806	0.0332919	0.0277752	0.140559	-0.0898661	0.0347991	0.0410352	-0.0314867	0.00047409	0.0347976	-0.00109626	-0.00049372	-0.0135137	-0.0146717	-0.00272723	0.0360205	-0.00552405	-0.00292066	0.0239163	-0.0114526	-0.00397911	0.00046719	-0.00781526	-0.02929	-0.00451866	-0.00172589	0.00350932	-0.00027082	0.00606909	-0.00105394
	a510	0.284177	-0.124535	0.358763	-0.118466	-0.102856	0.0814672	-0.00317655	-0.191135	-0.166411	0.723825	0.713247	-0.703235	0.477225	1.85991	-0.0874411	0.280454	-0.0985987	0.083409	0.377959	-0.287581	-0.118277	-0.0507901	0.513243	-0.0909713	-0.0614176	0.208726	-0.0278361	-0.0767589	0.018894	0.0129361	0.14452	0.0813191	0.0187184	0.0290956	0.0127207	-0.0750927	-0.0469153	-0.0289079	0.0103018	0.0308737	-0.0623506	-0.127452	0.0318586	0.0275997	-0.0497436	-0.0538256	-0.049349	-0.00632992
	a511	0.306455	-0.0131186	0.224932	-0.0539232	0.00200474	0.038914	-0.0413441	-0.0465776	-0.0529244	0.264098	0.449587	-0.0942668	-0.0331106	0.619949	-0.0686712	0.141889	-0.0179956	-0.121736	0.159613	-0.429746	-0.0966348	-0.0316286	0.319536	-0.0632362	-0.0472026	0.20655	-0.00384212	0.0176682	-0.0264541	0.0362422	0.0366595	0.028105	0.0403478	0.00557899	-0.0196815	-0.0135867	0.0105024	-0.00446449	-0.00929747	0.0608551	-0.067963	-0.040553	0.0306586	0.00891407	0.0362451	-0.0582637	-0.0434579	-0.0615203
	a512	2.72777	-0.424153	0.58723	0.389671	0.00735003	0.279882	0.182806	-0.311902	-0.34826	0.384038	2.4427	-0.537827	0.0106303	-1.21873	-0.335185	0.561873	-0.320437	0.108345	-0.610702	-2.02929	0.349304	-0.433436	1.60567	-1.01854	-0.295463	0.677827	0.0685421	-0.047311	-0.141355	0.0794627	-0.0786329	0.198845	0.0486061	0.0489426	0.120102	-0.0633438	-0.0253844	0.0203234	-0.0516994	0.0964462	0.102713	-0.124292	0.0749025	-0.0393795	0.00205115	-0.0420842	-0.0378446	-0.00370052
	a513	0.738424	-0.246893	0.343118	-0.0246369	-0.0745255	0.0817649	0.0191718	-0.181976	-0.163099	0.638376	1.30956	-0.880569	0.451738	0.990926	-0.0379418	0.31236	-0.175319	0.109254	0.533319	-0.506319	-0.111899	-0.0358429	0.738184	0.0932046	-0.0214435	0.192747	-0.0304567	-0.0840005	0.0272596	0.00657402	0.170257	0.0507029	0.0118333	0.0183375	-0.00300212	-0.0718538	-0.0465869	-0.0506174	0.0230198	0.018218	-0.049804	-0.0943065	-0.0373739	0.0469734	-0.0208247	-0.00847219	-0.00410953	-0.00814128
LHCⅡ M1'	b601	-0.00861613	0.00378562	-0.0093812	0.000993256	0.00106789	-0.00488519	0.000889079	0.00947308	0.00690983	-0.0146529	-0.00948342	0.00960969	0.000223995	-0.00926432	0.00426414	-0.00312598	0.000958791	0.00474096	-0.00179251	0.0067965	0.00173841	0.000765134	-0.00602735	0.00445056	0.00231728	-0.0046663	-0.000511521	-0.00278926	0.00562346	-0.00142405	0.00231291	-0.00261093	-0.00330638	-0.000363343	0.000257233	-0.000716662	-0.00119655	-0.00110428	0.00218214	-0.00586109	0.00211135	0.00352313	0.0429332	-0.111056	0.139171	0.0517921	0.207081	-0.147652
	a602	0.00936603	-0.00191957	0.0123731	-0.00249288	0.00383281	0.00435709	-0.00552249	-0.00886375	-0.00500034	0.0177251	0.0131103	-0.00335731	-0.00966125	0.00875465	-0.00296735	0.000945676	0.000868509	-0.00820636	0.00266838	-0.00824892	-0.00468436	-0.00122993	0.00492284	0.000579299	-0.00124535	0.00493861	0.000187297	0.00620528	-0.00746383	0.00344651	-0.00343666	-0.00130274	0.00545522	-0.00113726	-0.00372342	0.00366833	0.00395036	0.00196948	-0.00415364	0.0106816	-0.00656248	-0.00106923	-0.0165009	0.108152	0.00203623	-0.219998	-0.270771	0.0374406
	a603	-0.0109357	0.00605663	-0.0038594	-0.0144919	0.0025613	-0.0121289	-0.00743311	0.0128916	0.00946783	-0.00751986	-0.0122521	0.0180061	-0.00198958	0.00266095	0.00314211	0.00190483	0.00240606	0.00161654	0.00352464	0.00500785	-0.00307725	0.000703868	-0.00136847	0.00643637	0.00232023	0.000460448	-0.00258288	-0.0027746	0.00623688	-0.00174081	0.00805126	-0.00482097	-0.000844866	-0.00022971	-0.00374546	-0.00221442	-0.000986325	-0.0032513	0.00340524	-0.0021811	-0.00603859	0.00352416	-0.0639801	0.0455428	0.0678153	-0.471538	-0.546945	-0.259239
	a604	0.00851845	-0.00597095	-0.00661815	0.0321805	-0.00220507	0.0177193	0.0161302	-0.0120878	-0.0083844	-0.00713364	0.00954718	-0.0220519	0.00336641	-0.0216568	0.000874935	-0.0096224	-0.00162937	0.00250072	-0.00974938	0.00113668	0.00937586	0.000791692	-0.00732896	-0.00468997	0.000264038	-0.00891676	0.00396879	0.00210565	-0.006629	0.000451447	-0.0132681	0.00430035	-0.00297493	0.000205656	0.00709695	0.0040131	0.00066185	0.0042115	-0.00324028	-0.00323808	0.0150874	-0.000247863	0.0481678	0.0555709	-0.459371	1.9295	3.50994	1.10237
	b605	0.000912056	0.00211866	0.000221015	0.00534721	0.00358425	0.00307948	-0.000952754	-0.00123307	0.000755171	-0.000886417	0.0028462	0.00270304	-0.00891613	-0.00625484	0.00202927	-0.00447455	0.00567107	-0.00662078	-0.000884774	-0.000113454	-0.00127673	0.000108927	-0.00345134	0.00462185	0.00398074	-0.00206707	0.000331074	0.00289554	-0.00534481	0.00302857	-0.00377277	-0.00273919	0.00128786	-0.00143555	-0.00184642	0.00453467	0.00243034	-0.00121594	-0.00474294	0.00347378	-0.000737206	0.00469771	0.130942	-0.264887	0.533616	-0.644498	5.94997	-0.711438
	b606	-0.00729301	0.00433309	-0.0138982	0.017877	0.00486415	0.00329515	0.0057704	0.00536085	0.00581012	-0.0214217	-0.0062307	0.00703103	-0.00685076	-0.0281802	0.00785698	-0.0132026	0.00400885	0.00308105	-0.00720929	0.0104707	0.00598876	0.00261504	-0.0150781	0.00894495	0.00534456	-0.0128623	0.00107315	0.000869955	-0.00173558	-0.000958166	-0.00664354	-0.00494193	-0.00392331	-0.00169499	0.0010429	0.00458803	0.0019159	0.00167444	-0.000514735	-0.00408687	0.00734047	0.00728334	0.383249	-0.734741	0.0956742	3.57112	4.18721	0.223665
	b607	0.000759092	-0.00349096	-0.00653547	0.0106197	-0.0057509	0.00442246	0.00981973	-0.00236211	-0.00323984	-0.00701779	-0.00197231	-0.0117291	0.0117371	-0.00709004	-0.000372369	-0.00110879	-0.00296631	0.00644368	-0.00485795	0.00283967	0.00646196	0.000349477	-0.00178781	-0.0063154	-0.00065485	-0.0038154	0.00178345	-0.00347882	0.00210077	-0.00178869	-0.00239768	0.00499132	-0.00388882	0.00132039	0.00603425	-0.00180784	-0.00285212	0.000337927	0.000898626	-0.00702496	0.00969951	-0.00210259	0.00753661	0.0350459	-0.389888	1.29476	0.740992	0.753944
	b608	0.00156112	-0.00263197	0.00156351	-5.15858e-05	0.000850903	0.00109972	9.82348e-05	-0.00162319	-0.00120548	0.00220451	0.00224247	-0.00211703	2.80343e-05	0.00143516	-0.00092378	0.000608337	-0.000599956	-0.00078376	0.00178624	-0.00151307	0.000159788	0.00123134	0.00112025	-0.000938856	0.0022709	0.000665322	0.000161878	0.000440817	-0.00119822	-0.00255694	-0.00047828	0.000584512	0.000414522	-0.000295934	0.000158261	0.000173363	0.000198546	0.000485001	-0.00148357	0.000816249	-0.000239319	0.00350084	-0.030183	0.0856187	-0.0791417	0.010206	-0.0683909	0.108618
	b609	0.00834939	-0.00287675	0.00916199	-0.00089306	0.000617819	0.00414398	-0.00207164	-0.00769344	-0.00532432	0.0135304	0.0102873	-0.00665553	-0.00333668	0.0084324	-0.0035969	0.00250316	-0.000850183	-0.00501187	0.00189911	-0.00722164	-0.00262824	-0.00118485	0.00543668	-0.00278818	-0.00216903	0.00481409	0.000513772	0.00347775	-0.00442044	0.0022285	-0.00212832	0.00131557	0.0035225	-0.000186778	-0.00118331	0.00129279	0.00169519	0.00124613	-0.00241968	0.00613871	-0.00313529	-0.00250683	-0.0328511	0.151037	0.0815331	-0.179631	-0.0605974	0.0456572
	a610	-0.0181865	0.00945667	-0.00960575	-0.0178012	0.00219549	-0.0174036	-0.00799602	0.0207354	0.0147293	-0.0173364	-0.0209543	0.0275245	-0.00162811	-0.00174666	0.00574901	0.000468522	0.00345079	0.00386369	0.00321929	0.00971415	-0.00257845	0.00158761	-0.00502519	0.0100941	0.00397978	-0.00213226	-0.00317573	-0.00466725	0.00993957	-0.00322216	0.0105725	-0.00637616	-0.00267436	-0.000341148	-0.00391891	-0.00308493	-0.00186462	-0.00426517	0.00553231	-0.00578001	-0.0056784	0.00515289	0.146451	-0.382525	0.815193	-0.999995	-1.07688	-0.962809
	a611	-0.0143545	0.00867796	-0.0159704	0.0055364	0.00600052	-0.00643386	0.000389208	0.0158289	0.0129215	-0.0262013	-0.0140057	0.019968	-0.00731728	-0.0215803	0.00895422	-0.00948992	0.00463143	0.00356057	-0.00331218	0.0118857	0.00240342	0.00261761	-0.013679	0.0117917	0.00585154	-0.0101564	-0.000858097	-0.00217086	0.00432096	-0.00243122	0.000846413	-0.00713604	-0.00473035	-0.00132905	-0.00124629	0.00144881	0.000177637	-0.00143285	0.00311067	-0.00720727	0.00266503	0.00911986	0.157271	-0.33504	0.501988	-0.0241143	0.384907	-0.515375
	a612	-0.00216733	0.00794009	0.00556944	-0.00807629	0.0141101	-0.00469799	-0.0137815	0.00504548	0.00772868	0.00443427	0.00482297	0.0221699	-0.0249486	-0.00197403	0.00458726	-0.00612265	0.00741973	-0.0100832	0.0036819	-0.000973946	-0.00780214	0.00115946	-0.00458475	0.0148427	0.00441988	-0.000523046	-0.00193069	0.00713668	-0.00625947	0.00303703	-0.00121032	-0.0111109	0.00463035	-0.00327135	-0.00949018	0.00649466	0.0065025	0.000980534	-0.00325999	0.0110862	-0.012473	0.00800761	0.0677111	-0.0956212	0.50559	-0.724748	-0.849757	-0.56497
	a613	-0.000861855	-0.00572461	-0.00349018	-0.00529504	-0.013499	-0.00312389	0.00794953	0.000704938	-0.00405483	-0.00214415	-0.00802915	-0.0131804	0.0246799	0.0106936	-0.00507778	0.00989935	-0.00679692	0.00961462	-0.000276799	0.000307639	0.00470197	-0.000960006	0.00755431	-0.0138523	-0.00463978	0.00386112	0.000542064	-0.00847584	0.00965191	-0.0032969	0.00644025	0.0101579	-0.00407976	0.00355272	0.00750713	-0.00840009	-0.00726917	-0.0026649	0.00476045	-0.0109247	0.00739722	-0.00803626	-0.100446	0.1691	-0.388616	0.283863	-0.10789	0.443205
	a614	-0.00798558	0.00665911	0.000779145	-0.0222526	0.000441083	-0.0146905	-0.00847187	0.011474	0.00715704	-0.000507952	-0.00894527	0.0145747	0.00272254	0.0114086	-0.000600588	0.00736026	-5.25254e-05	0.00193828	0.00442219	0.00156213	-0.00683028	7.61627e-05	0.0042167	0.00106334	-9.28403e-05	0.00506739	-0.00255019	-0.00366575	0.00789365	-0.00128338	0.0108126	-0.00187044	7.61446e-05	0.000644296	-0.00323841	-0.00575072	-0.00166371	-0.00395087	0.00184095	-0.00147326	-0.00787272	0.00110966	-0.0228183	0.00854573	0.044463	-0.0701821	-0.0844832	-0.123404
LHCⅡ M2'	b601	0.00268442	0.00039385	0.00100369	0.00744716	0.00272335	0.00506582	0.000682029	-0.00365761	-0.00130784	0.00115259	0.00460991	-0.00081731	-0.0069905	-0.00629206	0.00140175	-0.00511846	0.0023581	-0.00291548	-0.0023267	-0.000498763	0.000184101	-1.70274e-05	-0.00333319	0.00351507	0.00127715	-0.00281929	0.00104933	0.00364954	-0.00494437	0.000554506	-0.00534172	-0.0020099	0.00109709	-0.000687616	-0.00094087	0.00388843	0.00357343	0.00127689	-0.00346761	0.00372324	0.000600889	0.00244698	0.05073	-0.0658498	0.0751156	0.0228218	0.063494	-0.0494149
	a602	-0.00305304	-0.000461962	0.00167299	-0.015294	-0.00394071	-0.0087468	-0.00364128	0.0052617	0.00181022	0.00237893	-0.0063014	0.00240758	0.00894883	0.0137429	-0.00317478	0.00936456	-0.00193625	0.00260621	0.00410026	-0.00117705	-0.00214838	-0.00139627	0.00723623	-0.00486568	-0.00339469	0.00659763	-0.00239986	-0.00448428	0.00720322	-0.00246763	0.00912237	0.00228255	-0.000152393	0.00222349	-0.000262361	-0.00576113	-0.00347334	-0.00459129	0.00325602	-0.00322395	-0.00381735	-0.00287625	-0.0836748	0.130334	-0.113426	-0.0983959	-0.158469	0.0663559
	a603	0.000852731	-0.00135052	0.0011809	0.00115928	-6.81594e-05	0.00074223	-0.00147425	-0.000913487	-2.75925e-05	0.00131888	0.00239467	0.00101454	-0.00317829	-0.00129296	0.000422015	-0.0013436	-0.00017409	-0.00190019	-0.00010734	-0.000335592	-0.000352779	0.00108148	-0.000799684	0.00168717	0.000598078	-0.000404616	0.000310358	0.00233382	-0.00279949	-0.00126909	-0.0012128	-0.00105329	0.000706547	0.00133331	-0.000795566	0.000748537	0.000894106	0.00137111	-0.000231987	0.00201152	-0.00108644	0.00131847	0.0126011	-0.0140848	0.0391241	-0.0184966	-0.0131588	-0.0369118
	a604	0.00486217	-0.00552721	0.00127108	0.00273773	-0.00758087	0.00410413	0.00639305	-0.00603672	-0.00669638	0.00363673	0.00224637	-0.0137556	0.0117301	0.00555501	-0.00427029	0.00418195	-0.00413128	0.00310469	-0.000953144	-0.0029291	0.00286319	-0.000895659	0.00481526	-0.00941575	-0.00333228	0.00229732	0.0014925	-0.00233595	0.00154098	-0.000673049	-0.000650734	0.00745082	-0.00102984	0.00189701	0.00508052	-0.00302188	-0.00287936	0.000292	0.000304067	-0.0035509	0.00551091	-0.00596638	-0.0171672	0.0458439	-0.108921	0.0277949	-0.0493189	0.128037
	b605	-0.00137463	0.000835454	0.00213588	-0.00955841	-0.00106452	-0.0053007	-0.00322588	0.00301385	0.00138158	0.00248491	-0.00356593	0.00329166	0.00244619	0.00764904	-0.00156692	0.00469784	-0.00102299	0.000246057	0.00163316	-0.000801877	-0.00110468	-0.00144307	0.00379243	-0.00151028	-0.00193688	0.00374016	-0.00397067	-0.00138098	0.00277498	-3.66386e-05	0.00467612	0.000603392	0.000670311	0.000808429	-0.00106597	-0.00219358	-0.00190456	-0.000675421	0.00114225	-9.87933e-05	-0.00358996	-0.00134439	-0.0241178	0.0366005	-0.0201634	-0.0486669	-0.0555052	-0.00744172
	b606	0.00633641	-0.00402247	0.00246343	0.00847771	-0.0026781	0.00786291	0.00522299	-0.00840792	-0.00648366	0.00478917	0.00668716	-0.0115576	0.00243061	-0.000464562	-0.00208084	-0.000905464	-0.00160586	-0.000584677	-0.00184133	-0.00302002	0.0020475	-0.000328012	0.00114008	-0.00416418	-0.00132392	-0.000285243	0.00150748	0.00158743	-0.00362657	0.000839304	-0.00496421	0.00370913	0.000480131	0.00038879	0.00273964	0.00113217	0.000334317	0.00207034	-0.00239539	0.00105344	0.00419277	-0.00291802	0.00694797	0.00920864	-0.0423197	0.0158651	-0.00685917	0.0687994
	b607	0.00139269	0.000256604	-0.00163904	0.00633549	-0.00202572	0.0035155	0.00310687	-0.00217678	-0.00177981	-0.00177044	0.00125866	-0.00446817	0.00129508	-0.00395577	0.000109923	-0.0018934	0.000531869	0.0010701	-0.00339102	0.000845395	0.000908224	5.80752e-05	-0.00159336	-0.00110483	-0.000173539	-0.00206821	-0.000482057	6.13218e-05	-0.00154154	-0.000277108	-0.00259231	0.00128427	-0.000853322	-5.24292e-05	0.0017827	0.000433386	0.000261928	-8.70786e-05	0.000173127	-0.00118976	0.00348308	5.10281e-05	0.0143563	-0.0198009	-0.0170873	0.0642667	0.136019	0.0475781
	b608	-0.000946749	-0.00109849	-0.000486009	-0.00106074	-6.0925e-05	-0.000969162	-0.00045735	0.00111215	0.000463093	-0.000930651	0.00129146	0.00109513	0.000360399	7.91306e-05	0.000234544	0.000361319	-7.67134e-05	0.0015201	-8.84896e-05	0.000348396	-0.000197369	-0.000191822	6.026e-07	0.000104655	5.84356e-05	8.52364e-05	0.000961421	-0.00113103	0.00180101	0.000120106	0.000752395	-0.000169575	-0.000194646	-0.000239135	-2.66995e-05	-0.000891973	-0.000910144	0.00223136	-0.00111751	-0.000710006	-0.000184697	0.00077531	-0.00314716	0.00367074	-3.00577e-05	-0.00297546	-0.00501777	-0.00518521
	b609	-0.000705667	0.00015657	-8.25783e-05	-0.0013174	-0.00086844	-0.00117424	-0.000700126	0.000921726	0.000373684	-0.000110166	0.0016292	0.000726508	0.000792449	0.000958375	6.49956e-05	0.00063713	0.000240038	0.000379741	-0.000965998	8.87565e-05	-0.000489505	-0.000210478	0.000407747	-0.00015089	-0.000242409	0.000442826	0.00225738	-0.00108942	1.64492e-05	-0.00483188	0.000887787	3.12799e-05	-0.000119254	0.000354208	2.16443e-05	-0.00110213	0.000142313	-0.000731207	-0.00121166	-0.000496007	-0.000456363	0.000364106	-0.00584014	0.00792823	-0.00421127	-0.0115462	-0.0151865	0.0028066
	a610	0.0045648	0.00129206	0.00570986	0.00485257	0.00675176	0.00524868	-0.00364486	-0.00535669	-0.00128481	0.007361	0.00881688	0.00224484	-0.0140925	-0.00417105	0.00157419	-0.00576829	0.00330856	-0.00711671	-0.000168418	-0.00268627	-0.00269437	0.000189398	-0.00274066	0.0066761	0.00203807	-0.00150858	0.000445249	0.00689432	-0.00842757	0.0031207	-0.00622167	-0.0048324	0.00375613	-0.00225854	-0.00405868	0.00630397	0.00524569	0.00282862	-0.00422936	0.00934876	-0.00394898	0.00296279	0.042733	-0.0442843	0.102974	-0.0631603	0.00176093	-0.0900602
	a611	0.000178186	7.93293e-05	0.000400524	0.00111212	0.00113905	0.00104654	9.48261e-05	-0.000668815	-0.000360627	0.000258333	-0.0011311	-0.000196489	-0.00112142	-0.000828706	0.000228769	-0.000656865	0.000553097	-0.000750594	-7.3565e-06	-9.26335e-05	-9.30628e-05	-4.59532e-05	-0.000294745	0.000505052	0.00186326	-0.000285153	0.000556958	-5.61952e-05	6.84015e-05	-0.000175479	-0.000846142	-0.000263082	0.000231654	-0.000480314	-1.0002e-05	0.0013166	-0.00147445	-0.000728755	-0.00120187	0.000542947	5.29091e-05	0.000203437	0.00622259	-0.00739622	0.00911723	-0.000496496	-0.00515791	-0.00627728
	a612	-0.00522888	0.00169486	-7.60012e-05	-0.014458	-0.00126107	-0.00986931	-0.00514969	0.00780512	0.00448844	-0.000842231	-0.00763875	0.00740024	0.00468636	0.00959712	-0.00113464	0.0069631	-0.00081196	0.00208175	0.00388492	0.000655834	-0.00265201	-0.000493721	0.00440925	-0.00125158	-0.00112474	0.00477063	-0.00197893	-0.00389565	0.00682766	-0.00147489	0.00876319	-0.000329158	-0.000324751	0.000883927	-0.00157655	-0.00468077	-0.00269704	-0.00327884	0.00364828	-0.00275002	-0.00478969	-0.000661294	-0.0557502	0.077019	-0.0452518	-0.0866418	-0.109812	-0.00233551
	a613	-0.000181093	-0.000104981	4.9796e-06	-7.80566e-05	0.000228169	-0.000157417	0.000709818	-9.93751e-05	4.34825e-05	-9.02213e-05	-0.000210803	9.8309e-05	-0.000116548	-7.5263e-06	1.7646e-06	-0.000113443	0.000157224	-0.000876138	0.000663902	-0.000104067	-0.00211856	0.00116775	-2.40096e-05	0.000201544	0.000503194	-5.47766e-05	0.000864431	-0.000121382	1.7161e-06	0.00102391	3.1748e-05	-0.000238462	-0.00014386	-7.46899e-05	-0.000119655	-0.000286979	4.14482e-05	-0.000492736	0.000112007	-9.09753e-05	-6.22253e-05	2.68862e-05	0.000794616	-0.000740831	-0.00454618	-0.0268687	-0.0447843	-0.00131385
	a614	-0.0032721	0.0041934	-0.00284468	0.0011137	0.00182598	-0.00122933	-0.00114824	0.00320248	0.00330245	-0.00447589	-0.00240248	0.00574171	-0.00403532	-0.0051379	0.00274402	-0.0030827	0.00460031	-9.75438e-05	-0.00070163	0.00281062	2.2581e-06	-0.00128238	-0.00352774	0.00447647	0.000706479	-0.00257491	-0.000647748	0.00036073	-0.000217364	0.000222406	-0.000269381	-0.00324327	-0.00050962	-0.000515625	-0.00147055	0.00134386	0.00120899	-0.000294682	-4.15499e-05	1.87183e-05	-0.00063405	0.00333133	-0.00909204	-0.0103202	0.00901161	0.0291119	0.0261392	-0.0191644
LHCⅡ M3'	b601	0.00676201	-0.00583031	0.00782627	-0.00888525	-0.00699489	-0.000749487	0.000261689	-0.00544284	-0.00641857	0.0132739	0.00422813	-0.0123767	0.011899	0.0183784	-0.00706819	0.0108149	-0.00481739	0.000778336	0.00334955	-0.00718481	-0.00114042	-0.00214389	0.0116668	-0.0114359	-0.00525254	0.00902886	-6.42228e-05	-0.00269493	0.00286988	0.000102679	0.00456837	0.00679178	0.00128963	0.00205908	0.00227	-0.00504453	-0.00325871	-0.0012881	0.00122574	-0.000504164	-0.00110319	-0.00702122	-0.134689	0.284305	-0.209897	0.378942	0.221253	0.421659
	a602	0.00183469	-0.00708467	0.000884825	-9.97795e-05	-0.00246211	0.00067189	0.000479808	-0.00153651	-0.0017442	0.0017116	0.00248745	-0.00361881	0.00290757	0.00205003	-0.00139966	0.001484	-0.0027396	-2.45825e-05	-0.000189175	-0.00139529	0.000880242	6.98026e-05	0.0019491	-0.00249579	0.00105571	0.00129994	0.000506113	-0.000208532	0.000106935	0.000271631	-3.28926e-05	0.00173825	-0.000188747	3.71956e-05	0.0010851	-0.00044379	-0.000839844	-1.86791e-05	0.000192808	-0.000386242	0.000674609	9.1805e-06	0.00469458	0.00680304	-0.024312	0.0601471	-0.0063742	0.0680902
	a603	-8.28349e-05	0.000224203	0.00567232	-0.0121199	0.00048451	-0.0052914	-0.00625569	0.00197195	0.0010516	0.00718533	-0.000261438	0.00456575	-0.00124859	0.0113045	-0.00211128	0.00559201	-0.000120632	-0.00233404	0.00399445	-0.00326454	-0.00392243	-0.00102974	0.00535147	-0.000157899	-0.00217827	0.005855	-0.00304257	6.6037e-05	0.0015537	0.000629931	0.00497259	-0.000945589	0.00249437	0.000315353	-0.00310939	-0.00163043	-0.00014717	-0.00198438	0.000865288	0.00307545	-0.00676467	-0.0014336	-0.0582578	0.113138	0.026199	-0.300941	-0.228964	-0.0910308
	a604	-0.00150039	-0.00157798	-0.00355418	-0.00156552	-0.00451497	-0.00206541	0.00349048	0.00162912	-0.000506373	-0.00354432	-0.00456094	-0.00428626	0.0104915	0.00246378	-0.00125468	0.00328183	-0.00232062	0.00521877	-0.000631943	0.00165512	0.00256531	-0.000327436	0.00173475	-0.00560374	-0.00123611	0.000311557	5.1413e-06	-0.00457969	0.00453779	-0.00123414	0.00291185	0.00386208	-0.00283242	0.00121745	0.00348522	-0.00375119	-0.00335356	-0.00124599	0.00209551	-0.00606148	0.00377795	-0.00206942	-0.0333015	0.0358075	-0.125668	0.0932447	-0.0213702	0.142472
	b605	-0.00399109	0.00205911	-0.00195784	-0.00286605	0.00176639	-0.00327705	-0.00242393	0.00418758	0.00357332	-0.00340369	-0.00366158	0.00646269	-0.00229536	-0.00136066	0.00193802	-0.000694036	0.00190806	0.00035593	0.000752517	0.00242178	-0.000851004	0.000384632	-0.00176978	0.00346499	0.00181347	-0.000886218	-0.00122692	-0.000512166	0.00129111	-0.000396392	0.00191304	-0.00272397	-0.000364483	-0.000322397	-0.00170608	3.80553e-05	0.000157665	-0.000607944	0.00113057	-0.000315661	-0.00192365	0.00262589	-0.0513972	0.0423772	-0.0222338	-0.0352819	-0.0400721	-0.017931
	b606	-0.000156229	-0.00166359	0.000652916	-0.00650786	-0.00362122	-0.00332659	0.000408051	0.000917092	-0.00100976	0.00164407	-0.00231877	-0.00331357	0.00864806	0.00812257	-0.0027441	0.00595158	-0.00168426	0.00371155	0.00264803	-0.00110865	8.71281e-05	-6.56965e-05	0.00488904	-0.00590464	-0.00193229	0.00359868	-0.000240949	-0.00353843	0.00547468	-0.000387352	0.00442091	0.00359386	-0.000930522	0.000906535	0.00191953	-0.00402876	-0.00272709	-0.00111129	0.00281144	-0.00350157	0.000231557	-0.00268815	-0.0361199	0.057472	-0.0681743	-0.0418288	-0.0867119	0.0613376
	b607	0.00211092	-0.00269309	-0.00104408	0.00247226	-0.00404416	0.00195958	0.00454396	-0.00254405	-0.00317621	-9.12569e-05	0.000223364	-0.00805103	0.00812993	0.00154524	-0.00197466	0.00202088	-0.00349053	0.00300421	-0.00109351	-0.000521307	0.00250683	-9.21339e-05	0.00194303	-0.00592967	-0.0017507	0.00041539	0.00141198	-0.00231733	0.00171976	-0.000451369	-0.00018386	0.00442229	-0.00157059	0.000930092	0.00360831	-0.00216831	-0.00275159	0.000117951	0.000582863	-0.00357111	0.00429199	-0.00399498	0.0131301	-0.00173784	-0.0682476	0.0933318	0.0248062	0.1165
	b608	-0.00195654	0.0029247	-0.00247578	0.00638028	0.0046318	0.00222867	-0.000684626	0.00107165	0.00266542	-0.00455898	0.000379443	0.00609054	-0.00924502	-0.0101605	0.00404688	-0.00709936	0.00286745	-0.00222615	-0.0024048	0.00280611	0.000140002	0.000515036	-0.00648675	0.00751877	0.00302735	-0.00498783	0.000175755	0.00317315	-0.0036912	0.000623918	-0.00414284	-0.00463409	0.000233679	-0.00132887	-0.00208676	0.00435489	0.0028559	0.00116662	-0.00280401	0.00259163	-8.77031e-05	0.0040436	0.00825128	-0.0301906	0.065584	-0.0206065	0.0177798	-0.0922309
	b609	-0.00279778	0.0044223	-0.00242913	0.00414643	0.0046377	0.000731694	-0.00151739	0.00213662	0.0034065	-0.00454805	-0.000387305	0.00730462	-0.00892987	-0.00864179	0.00393426	-0.00602499	0.00423821	-0.00207629	-0.00109249	0.00293517	-0.000610412	0.00171627	-0.00592689	0.00737968	0.00408706	-0.00435903	-0.00025005	0.00266121	-0.00275224	0.000540763	-0.00280627	-0.00478589	0.00019453	-0.00127133	-0.00236266	0.0036448	0.00244468	0.000780839	-0.00174253	0.00224989	-0.000868239	0.00393513	0.00937553	-0.0352529	0.0774574	-0.0389046	0.0110712	-0.107796
	a610	-0.00218199	0.00306322	-0.00338749	0.00349417	0.00224467	0.000619227	0.00105092	0.00156064	0.0016424	-0.00499001	-0.0024603	0.00238902	-0.00173907	-0.00602203	0.00225037	-0.00340105	0.00135543	0.000595204	-0.000486174	0.00263357	0.00169079	-0.00177203	-0.00383597	0.00268007	0.000777843	-0.00329624	-0.000116471	5.06224e-05	-0.000521749	-0.000628501	-0.00135601	-0.00148434	-0.000897145	-0.000661653	8.80505e-05	0.000989328	0.000525317	0.000427351	-0.000166886	-0.0009839	0.00146236	-0.000110999	-0.0312072	-0.000733622	-0.0256351	0.01146	0.00200305	-0.0009898
	a611	0.00718289	-0.00632385	0.00938978	-0.0129486	-0.00800846	-0.00255821	-0.000813441	-0.00500109	-0.00670136	0.0154766	0.0040031	-0.0128985	0.0141054	0.0233629	-0.00860038	0.0139775	-0.00573227	0.00101211	0.00476384	-0.00865086	-0.00214303	-0.0024821	0.0145382	-0.0135872	-0.00643708	0.0116865	-0.000430542	-0.00369158	0.00444585	-0.000283675	0.00690452	0.00786051	0.00158807	0.00261786	0.00223454	-0.00684431	-0.00412702	-0.00212536	0.00223702	-0.000928996	-0.00242005	-0.00841064	-0.027788	0.12293	-0.008048	0.234713	0.182217	0.250935
	a612	-0.00702917	0.00636265	-0.00336568	-0.000450428	0.00718251	-0.00307732	-0.00514862	0.00669799	0.00720102	-0.00715723	-0.00457774	0.0156094	-0.0126222	-0.00879245	0.00575364	-0.00654319	0.00518317	-0.00279618	0.00051126	0.00478713	-0.00235643	0.0013392	-0.00730982	0.0118787	0.00465633	-0.0045889	-0.00111614	0.00282421	-0.00175308	0.000590775	-0.000669125	-0.00777925	0.000618498	-0.00208454	-0.00478091	0.00400866	0.0033096	0.000116193	-0.000775126	0.00297248	-0.00406359	0.0064089	-0.152043	0.156121	0.021838	-0.385051	-0.236911	-0.227114
	a613	0.00294643	-0.00422803	-0.00438121	0.0108432	-0.00544742	0.00573415	0.00947684	-0.00439914	-0.00457021	-0.00390191	0.000950098	-0.0130218	0.010337	-0.00541156	-0.00111499	-0.00104147	-0.00307063	0.00496301	-0.00452854	0.0010807	0.00584245	-3.49327e-05	-0.000885077	-0.00678018	-0.00151934	-0.00303602	0.00183883	-0.00248863	0.000651359	-0.00103543	-0.0034307	0.00537547	-0.00315792	0.00133381	0.0058846	-0.00123091	-0.00227893	0.000924157	0.000314952	-0.00555366	0.00914363	-0.00253407	0.0464715	-0.028095	-0.183353	0.609176	0.316038	0.407902
	a614	0.00749258	-0.00152977	0.00191914	0.0159883	0.00241026	0.0109664	0.00469705	-0.00871923	-0.00516804	0.00241845	0.0101084	-0.00853144	-0.00701785	-0.00988586	0.000273114	-0.00653285	0.000584247	-0.00399679	-0.00480876	-0.00280137	0.00154106	0.000112709	-0.0035111	0.000945376	0.000553798	-0.00334314	0.00113529	0.0050502	-0.00742599	0.000826507	-0.00925309	-3.79656e-05	0.00137338	-0.000571639	0.000862294	0.00482024	0.0031928	0.0021306	-0.00513135	0.00404599	0.00386785	0.000928585	0.210855	-0.253451	0.318486	0.575275	0.884872	-0.0387435
CP29'	a601	0.0164797	-0.00531999	-0.0623773	0.208571	0.0511086	0.172244	0.097452	-0.077592	-0.00451216	-0.0366757	0.020331	-0.0846109	-0.0273212	-0.050214	0.0223511	-0.0393276	0.00595334	-0.00451199	-0.00987261	0.00650516	0.0189958	0.0021492	-0.0359274	0.0100515	0.00467253	-0.0291918	-0.0045958	-0.00491066	-0.0101879	0.00528292	-0.0341247	-0.00169555	-0.0255579	0.00510154	0.0179156	0.00881054	-0.00531356	-0.0288394	0.01378	-0.0921803	0.0692575	0.0483726	0.0153297	-0.018403	0.0114368	0.00310151	0.00830324	-0.000872603
	a602	-0.0867151	0.0138781	0.0762347	-0.437907	-0.317905	-0.345231	-0.0493555	0.29636	0.00769586	-0.111283	-0.180023	0.239062	0.165104	0.0946623	-0.0483998	0.0971029	-0.0723413	0.0229447	0.0224731	0.00438859	-0.0176558	0.00593312	0.0741954	-0.0381828	-0.0289078	0.0548144	-0.0189441	-0.0140572	0.0524633	0.0158187	0.0814107	0.0429713	0.0310973	0.0117458	-0.00261838	-0.0199881	-0.0140124	0.00126934	-0.0562377	0.123402	-0.0677511	-0.171118	-0.0272935	0.0263862	-0.0169269	0.0042396	0.00329235	0.00290506
	a603	0.150522	0.0115884	0.05758	-0.0246573	1.15349	-0.115422	-0.215276	-0.275354	0.0909581	0.49683	0.34416	-0.170034	-0.344806	-0.0471134	0.0472397	-0.104288	0.023432	-0.0666733	0.000154571	-0.0318116	-0.048461	0.00714329	-0.0655201	0.0749152	0.0359175	-0.0341686	-0.00076905	0.0383953	-0.112828	0.0547292	-0.0660228	-0.10511	0.00327702	-0.00891568	-0.0641211	0.0468673	0.0471674	0.00195683	0.00984956	0.036903	-0.119361	0.237299	0.0185884	-0.009322	0.0134247	-0.0234347	-0.0255591	-0.0153442
	a604	0.0162886	0.00148418	-0.107697	0.962356	-1.95875	1.1847	0.365425	0.21756	-0.119883	-0.331392	-0.0494715	-0.133774	0.138798	0.0072918	-0.00326209	-0.016121	-0.0232739	0.0136851	-0.0145812	-0.0118351	0.0416113	-0.000764481	-0.000807214	-0.0338865	-0.0128008	-0.0240363	0.0583837	0.015314	0.0975339	0.0133517	-0.0758862	0.037054	-0.0131144	0.00304378	0.057481	0.0087781	-0.0013034	-0.00834263	-0.0136501	-0.0990551	0.24187	-0.0284005	-0.00677528	0.00696859	-0.0133501	0.00910897	0.00190749	0.0111651
	b606	0.159171	-0.0934707	-0.450335	6.07295	1.15568	2.05832	0.843297	0.445274	-0.00833883	-1.09819	0.154245	-1.24542	-0.116675	-0.24983	0.0478723	-0.140064	-0.00248258	-0.0354605	-0.0984033	-0.0348357	0.133323	-0.00963346	-0.119237	-0.00973918	0.0270074	-0.0992856	0.036782	0.0410103	0.177393	-0.0463832	-0.173906	-0.0252863	-0.0429575	0.000471616	0.0555771	0.0268959	0.00150938	0.0145706	0.101269	-0.205144	0.407998	0.300204	0.00059195	0.00420483	-0.0236374	0.00360271	-0.00754366	0.0210636
	b607	-0.122567	0.0476474	-0.228957	0.313584	-0.642391	-0.136304	0.31797	0.576325	0.151904	-0.549842	-0.302624	0.135408	0.21035	-0.146934	0.0043972	0.0237458	-0.0086106	0.0594106	-0.0293969	0.0508007	0.0598779	0.00607341	-0.0304492	-0.024086	-0.00311439	-0.0233892	0.016554	-0.0428428	0.235754	-0.11249	0.0687548	0.058587	-0.0425096	0.032741	0.068085	-0.0517307	-0.0689888	-0.0342028	0.044994	-0.156695	0.189133	-0.0472986	0.00923231	-0.013076	-0.00854939	0.0168782	0.0135934	0.0223906
	b608	-0.28795	0.249728	-0.153124	0.298824	-1.15375	0.0524002	0.423437	1.87986	0.057684	-1.78843	-0.683698	0.618622	0.372828	-0.0596552	-0.0427904	0.136138	-0.136524	0.0522948	0.00294861	0.0538437	0.0416567	-0.00237764	0.0465087	-0.0472448	-0.0158943	0.0431131	-0.00456356	-0.0778172	0.192414	0.042608	0.137104	0.0986698	0.00217619	0.030321	0.0560254	-0.0508969	-0.0703194	-0.0305986	0.00281032	0.0363404	0.107813	-0.222719	-0.00473876	-0.000699807	0.00436792	0.00529415	0.00507888	-0.00241293
	a609	-0.300815	-0.00276232	0.294694	-1.37991	-1.50339	-0.336401	0.0559112	-0.013925	-0.292427	0.0345469	-0.86765	0.981349	0.704905	0.294396	-0.110184	0.243611	-0.102116	0.108627	0.0582121	0.0288625	-0.00644607	-0.0192908	0.217937	-0.113104	-0.0647647	0.124362	-0.0151575	-0.0529182	-0.0439654	0.0336797	0.155982	0.13087	0.0459617	0.0300268	0.0388885	-0.0543752	-0.0514492	0.0160319	-0.102	0.192696	-0.0562046	-0.385126	-0.0350801	0.0225602	-0.00161808	0.0188062	0.0226632	-0.00599062
	a610	0.437912	-0.144205	0.783334	-1.30356	1.83845	-0.996015	-0.924269	-4.16771	-0.315564	3.28679	0.779767	-0.387925	-0.618502	0.143678	0.0809417	-0.203836	0.115298	-0.174795	0.0196227	-0.10455	-0.130803	-0.00721064	-0.017696	0.123365	0.0562182	-0.0282807	-0.0183586	0.106431	-0.9226	0.202866	-0.206993	-0.295741	0.0219704	-0.0643097	-0.198259	0.158689	0.175066	0.0181807	-0.0417207	0.227926	-0.501641	0.707346	0.0142057	-0.00282836	0.0109687	-0.0252167	-0.0203256	-0.0165316
	a611	0.261031	-0.132402	0.373781	0.0945447	0.567361	0.704268	-0.16365	-1.3517	-0.587602	0.776687	0.352991	-0.445389	-0.223125	0.0508006	0.0249712	-0.145837	0.0140448	-0.104673	-0.0162576	-0.0884254	-0.0272337	-0.0070547	-0.0116082	0.0258677	0.0296353	-0.0457095	0.0218207	0.117231	-0.721813	0.18919	-0.308863	-0.124021	0.0377476	-0.041043	-0.0610623	0.160433	0.111283	0.0964123	-0.254356	0.272995	-0.0984403	0.1474	0.0151131	-0.00789916	0.00140329	-0.0117579	-0.0123078	0.000342051
	a612	-0.163771	0.0995148	-0.00598405	-0.684843	-0.225712	-1.34858	-0.24304	0.958559	0.401347	-0.19137	-0.215214	0.497174	0.118826	0.0347211	-0.0499261	0.133049	-0.011293	0.0369189	0.0463964	0.0392331	-0.0372102	-0.00216621	0.065337	-0.0137922	-0.0148945	0.0708971	-0.0016801	-0.0609813	0.268888	-0.0106996	0.216974	0.0467873	0.0381627	0.00238139	-0.0221185	-0.053348	-0.0301925	-0.0495683	-0.000758477	0.21183	-0.17964	-0.145356	-0.0158049	0.014362	-0.00194669	-0.000335128	0.00204619	-0.00685274
	a613	-0.171769	0.105754	-0.327734	0.177323	-0.112757	-0.413297	0.163771	0.749272	0.396931	-0.554795	-0.208051	0.212964	0.118575	-0.142332	0.0258785	0.0435131	0.00128002	0.0864392	-0.0178762	0.0848952	0.0524922	0.0110847	-0.0513699	0.00358015	0.0042884	-0.0161754	-0.0154913	-0.0993592	0.426838	-0.0979808	0.184611	0.0417741	-0.0789222	0.0329127	0.0569796	-0.116504	-0.0865838	-0.10217	0.228018	-0.296263	0.133115	0.0502482	0.0174391	-0.0284505	0.0143222	0.022779	0.0240076	0.0103248
	a616	-0.0774108	0.113711	-0.25456	0.372115	0.0104016	-0.0153679	0.17259	0.548288	0.185386	-0.729247	-0.00318475	0.0457937	-0.0473018	-0.174997	0.0277283	-0.0200752	0.0124143	0.022681	-0.0259777	0.0493681	0.0435749	0.0345308	-0.079897	0.0220816	0.018091	-0.0358269	-0.00129174	-0.0472543	0.178596	-0.0858567	0.0488288	0.0145255	-0.0371057	0.00553948	0.027675	-0.0381037	-0.0180052	-0.0843003	0.223928	-0.151278	0.100817	0.0127735	0.0302959	-0.0324436	0.0252504	-0.00423635	-0.000383523	-0.00764321
CP26'	b601	-0.00427972	-0.000434298	-0.00212262	-0.0102109	-0.00905422	-0.00741191	1.1864e-05	0.00612063	0.00189681	-0.00370942	-0.00704957	0.00118167	0.0107481	0.00752659	-0.00235247	0.00718381	-0.0040656	0.00370115	0.00123876	0.000979028	0.000146366	-0.00157993	0.00436954	-0.00502095	-0.00208505	0.00365485	-0.000450234	-0.00490813	0.00733406	-0.00363047	0.0073173	0.00350692	-0.00174125	0.00153783	0.00174115	-0.00523995	-0.00462366	-0.00213787	2.72161e-05	-0.00588399	0.000249285	-0.00311733	-0.0248766	0.0323178	-0.0470335	0.00701752	-0.0146912	0.0314498
	a602	0.00201042	0.00403806	0.00312493	0.0050261	0.00587355	0.00353274	-0.00380643	-0.00292924	0.000873593	0.0040218	0.00841703	0.00443278	-0.0138857	-0.00658523	0.00299911	-0.00652294	0.00118309	-0.00692963	-0.000301153	-0.00043837	-0.00262806	0.000254659	-0.00441626	0.00777681	0.0048207	-0.00293734	0.000191298	0.00532824	-0.00716918	0.00472101	-0.00539687	-0.0061062	0.00248765	-0.00560038	-0.00413357	0.00741975	0.00594103	0.00237604	-0.00148197	0.00767463	-0.00352449	0.0055827	0.0241988	-0.0311465	0.0650822	-0.0316661	0.00657718	-0.0571674
	a603	-0.00595693	0.00124641	-9.70342e-05	-0.0195907	-0.00387241	-0.0135333	-0.00547523	0.0102711	0.00495909	-0.00131736	-0.010253	0.00745073	0.00939814	0.0132909	-0.00292255	0.0105098	-0.00221186	0.00342177	0.00462868	0.00022428	-0.00257504	-0.000994021	0.00699578	-0.00429146	-0.00252606	0.00702564	-0.00229047	-0.00582495	0.0100656	-0.00228088	0.0118773	0.00168006	-0.000573813	0.00177556	-0.000760607	-0.00721148	-0.00441244	-0.00451822	0.0054623	-0.00472374	-0.0051634	-0.0021113	-0.0353501	0.0514893	-0.0456617	-0.0353244	-0.0610976	0.0151175
	a604	-0.00414868	-8.13426e-05	-0.00811668	0.00387919	-0.00396702	-0.00115647	0.00574586	0.00440387	0.00190355	-0.0108103	-0.00658958	-0.00146123	0.00848169	-0.004549	0.00116431	-0.000208355	-0.00146411	0.00583084	-0.00216975	0.0040889	0.00397067	0.000416151	-0.00224525	-0.00265282	-0.000207714	-0.00288453	0.00050073	-0.00454799	0.00503253	-0.00266919	0.00153704	0.0026752	-0.00428182	0.00130517	0.00401532	-0.00296086	-0.00315811	-0.00100442	0.00299079	-0.00855126	0.00629628	-0.000211607	-0.00330015	-0.00768296	-0.033369	0.0730682	0.04964	0.0470098
	b606	-0.00339881	-9.40588e-05	-0.00375983	-0.00392424	-0.00272309	-0.00413894	0.0014705	0.0045514	0.00186872	-0.00517421	-0.00719359	0.000624178	0.00756057	0.00248934	-0.00065357	0.00339726	-0.002385	0.00371173	0.000530073	0.00171306	0.00112837	-4.9956e-06	0.00136346	-0.0033142	-0.000808661	0.000928386	-0.000510008	-0.00407207	0.00552087	-0.00234968	0.00422504	0.00240494	-0.00231914	0.00160275	0.00214972	-0.00357796	-0.00488479	-0.00141834	0.00207285	-0.00586285	0.00175315	-0.0011683	-0.0140631	0.0156464	-0.0330312	0.0152106	-0.00536965	0.0278851
	b607	0.00170046	-0.00228611	-0.00346564	0.00988233	-0.00377759	0.00580948	0.00715636	-0.0034671	-0.00318537	-0.00377772	0.000907716	-0.00783097	0.00466792	-0.00503395	0.00010961	-0.00254304	-0.00137248	0.0022944	-0.00283647	0.000806866	0.00378196	0.000402255	-0.00199725	-0.00271451	-0.000217524	-0.00315134	0.00151653	-0.000538033	-0.000830197	-0.000649775	-0.00390148	0.00344568	-0.00210376	0.000650851	0.00403685	0.000256097	-0.000757676	0.00126805	0.000121335	-0.00366286	0.00693489	-0.00159941	0.00737882	-0.0107704	-0.0188893	0.0401566	0.0268935	0.0358808
	b608	0.00456519	-3.1488e-06	0.00347048	0.00856959	0.0044845	0.00719389	-0.000319313	-0.00656299	-0.00264713	0.00510211	0.00793651	-0.00151526	-0.0103694	-0.00612532	0.0016745	-0.00639088	0.00324596	-0.00479645	-0.00160766	-0.00155724	-0.00062727	0.000123442	-0.00343615	0.00475852	0.00159665	-0.00295098	0.0012586	0.00560345	-0.00793034	0.00177397	-0.00719533	-0.00306279	0.00236318	-0.00252769	-0.0019684	0.00568689	0.00410832	0.00400719	-0.00352719	0.00689193	-0.000633934	0.0019002	0.0274686	-0.0348207	0.0502739	-0.00448559	0.0252609	-0.0349098
	a609	0.00429337	0.000606104	0.00312396	0.0111417	0.0060702	0.00856679	-0.000325133	-0.00706064	-0.00218403	0.00446618	0.00899642	-0.000608947	-0.0132267	-0.00931666	0.00294	-0.00856042	0.00270434	-0.00558615	-0.00205169	-0.000947638	-0.000644993	0.00107821	-0.00535095	0.00690362	0.00252535	-0.00451855	0.00097421	0.00656681	-0.00932836	0.00202756	-0.00873905	-0.00468673	0.00243067	-0.00184988	-0.00258474	0.0071863	0.00506911	0.00313512	-0.00433841	0.00793415	-0.000619598	0.00322274	0.0301623	-0.0414069	0.0606775	-6.37327e-05	0.0317872	-0.0432946
	a610	-0.000989332	-0.000319907	0.000562988	-0.00600149	-0.00348251	-0.00349828	-0.000721614	0.00188314	0.000493981	0.000609447	-0.00574467	0.000774588	0.00415053	0.00529616	-0.00139121	0.0036784	0.00328096	0.00232642	0.00280122	-0.000490809	-0.000685681	0.000541662	0.00309623	-0.00229209	-0.00296537	0.00269692	-0.000438632	-0.00146342	0.00454795	-0.00327624	0.00368816	0.00127019	-0.000233039	0.00295445	0.000225651	-0.00353208	-0.00126067	-0.00134189	0.00146273	-0.00179754	-0.00140066	-0.000917215	-0.0172045	0.0256627	-0.0283899	-0.0190796	-0.0358948	0.0152668
	a611	-0.00793854	-0.0013102	-0.00447124	-0.0194972	-0.0119142	-0.0142019	0.000805513	0.0115078	0.00316732	-0.00675735	-0.0162724	0.0010458	0.0228205	0.015718	-0.00470009	0.0142614	-0.00568536	0.00948052	0.00367836	0.00179107	0.000869789	-0.0010626	0.00911068	-0.0108123	-0.00460856	0.00736358	-0.00179754	-0.0105082	0.0157115	-0.00437527	0.0144451	0.00747443	-0.00353659	0.00366595	0.00411194	-0.0115525	-0.00846011	-0.00565973	0.00815562	-0.0121732	0.000781927	-0.00657502	-0.0620953	0.0811815	-0.123945	0.0247799	-0.0406507	0.0891413
	a612	-6.18117e-05	0.00459437	0.00402844	-0.00136584	0.0101216	-0.000692244	-0.00822905	0.000933558	0.00405892	0.00426408	0.00520242	0.0116331	-0.0173876	-0.00427443	0.00358604	-0.00560276	0.0048461	-0.00694943	0.00102313	-0.000365536	-0.00451196	0.000441096	-0.00401576	0.0104391	0.00353048	-0.00153943	-0.000834254	0.00583717	-0.00616172	0.00251157	-0.00263833	-0.00852981	0.00333468	-0.00282137	-0.00662358	0.0058805	0.00521298	0.00154032	-0.00377642	0.00900677	-0.0076647	0.00608488	0.0277314	-0.0359764	0.115205	-0.0835937	-0.0222034	-0.120952
	a613	0.00529632	-0.00519193	-0.00270385	0.0164544	-0.00705602	0.0116315	0.0117472	-0.00911723	-0.00792832	-0.00191085	0.00405843	-0.0167109	0.00809078	-0.0053191	-0.00132538	-0.00268873	-0.0027462	0.00282256	-0.00422969	-0.000789771	0.00558701	-0.000178768	-0.00109334	-0.00612985	-0.00138045	-0.00335587	0.00279494	-0.000303075	-0.0022707	-0.000202652	-0.00691591	0.00659913	-0.00209844	0.000947872	0.00644869	0.000481901	-0.00129022	0.00257259	-0.00124608	-0.00406449	0.0107379	-0.00415209	0.00218996	0.00238986	-0.0570085	0.0537942	0.0212448	0.0799811
	a614	0.00781796	-0.00390552	0.0114397	-0.00529409	-0.000804146	0.00355486	-0.00320839	-0.00956543	-0.00687354	0.0168902	0.0086399	-0.00651639	-0.00221409	0.0115406	-0.00438296	0.00362069	-0.0013027	-0.00613044	0.00321004	-0.00693625	-0.00451961	-2.13748e-05	0.00658049	-0.00290901	-0.00160687	0.00544371	-8.45669e-05	0.00375749	-0.0063661	0.00330654	-0.00171786	0.00172088	0.00450881	-0.000281305	-0.0017755	0.00124452	0.00164816	0.00205845	-0.00396034	0.00821578	-0.00477844	-0.00339455	-0.0281822	0.0627809	-0.044659	-0.104219	-0.19414	0.00807975
CP47'	a602	-0.0294429	-0.0183649	-0.0104895	-0.0442456	-0.269374	0.0437607	0.115018	0.0450747	-0.0583507	-0.0716108	-0.101706	-0.00368601	0.16108	0.0614849	-0.0275286	0.0415459	-0.0440289	0.0302965	-0.0024533	-0.00235564	0.0193548	-0.00743563	0.0368673	-0.050714	-0.014851	0.0139548	0.00433158	-0.0130769	0.0420633	-0.0263019	0.00460669	0.0711386	-0.00253718	0.00926591	0.0459782	-0.0200054	-0.0320133	0.00398648	0.000301964	-0.0368161	0.0819322	-0.0927559	-0.034416	0.0347143	-0.0483935	0.0240724	0.00995235	0.0346041
	a603	-0.114499	0.0688559	-0.0750794	-0.357747	0.0373316	-0.3931	-0.110077	0.33415	0.189593	-0.175141	-0.129242	0.297806	-0.000129523	-0.0465397	0.0128141	0.0357479	0.0120475	0.0313844	0.0120779	0.0510053	-0.0145528	0.00975792	-0.0159908	0.0296203	0.00660024	0.00904438	-0.0169437	-0.0480452	0.145336	-0.0190004	0.119245	-0.0166385	-0.0195447	0.00726003	-0.0171697	-0.0493962	-0.0272354	-0.0387638	0.061669	-0.0507296	-0.0639175	0.0320301	0.0516685	-0.0675044	0.0817205	-0.0045047	0.0218102	-0.0394447
	a604	0.0236851	0.00903945	-0.159481	0.587266	0.112304	0.125249	0.156258	0.094944	0.0584666	-0.33343	0.0868734	-0.183075	-0.115528	-0.266948	0.0392447	-0.0826134	0.0119981	-0.00404669	-0.0468659	0.0233159	0.0442709	0.0274708	-0.0989958	0.0299783	0.0295037	-0.0655268	0.0141064	0.0133012	0.0200465	-0.0250897	-0.0539993	-0.0284169	-0.0276206	-0.0101963	0.0127469	0.0142042	0.00576468	0.00366394	0.012555	-0.0720477	0.0944872	0.070564	0.0308716	-0.022217	-0.0169468	-0.0035072	-0.0161136	0.0326526
	a605	0.101187	-0.0754581	0.0918903	0.189534	0.0397074	0.221054	0.0391403	-0.23645	-0.124734	0.217615	0.123638	-0.231707	-0.00238723	0.108158	-0.0203332	-0.00382456	-0.00895666	-0.0342189	0.00913879	-0.0538897	-0.00827408	-0.000532198	0.0395315	-0.0304223	-0.0144414	0.014291	0.00544797	0.0306255	-0.0979707	0.0301035	-0.067489	0.011972	0.0203594	-0.00607533	0.00340526	0.0372244	0.0190932	0.0177196	-0.0622413	0.0528328	0.0157559	-0.0169623	-0.0925114	0.10676	-0.0927566	0.0276809	0.00660465	0.0256173
	a606	-0.198601	0.0217646	0.0297694	-0.747097	-0.404817	-0.304493	-0.00794383	0.185287	0.0263125	0.100264	-0.42566	0.415379	0.3848	0.207493	-0.0416041	0.144842	-0.0688744	0.0958262	0.028708	0.0544505	0.00310691	-0.00913712	0.0982147	-0.0553023	-0.0276605	0.0592528	-0.0161379	-0.0805489	0.157322	-0.0411247	0.160762	0.0767228	-0.0147156	0.0255137	0.0367742	-0.0830163	-0.0825238	-0.0347453	0.0460747	-0.0493015	-0.00994963	-0.13808	0.0474672	-0.0799758	0.0724152	0.0314253	0.0472955	-0.00646165
	a607	0.267643	-0.105761	-0.151265	1.93086	0.959948	0.658959	0.169497	-0.257356	-0.0769442	-0.357825	0.682952	-1.04684	-0.427827	-0.322799	0.0519422	-0.184233	0.0209871	-0.0895374	-0.0627213	-0.0626513	0.0384921	3.12275e-05	-0.134735	0.0342606	0.0237157	-0.0931161	0.0442731	0.084276	-0.156135	0.0252084	-0.222124	-0.0813496	-0.00152574	-0.0585572	-0.0169443	0.0883007	0.0761197	0.0305942	-0.0578955	-0.0107278	0.117109	0.182215	-0.0293569	0.0491065	-0.0636572	-0.00835248	-0.0258145	0.0275423
	a608	-0.0699463	0.0352888	-0.114266	0.0367634	-0.0461655	-0.0782157	0.0514952	0.131489	0.0651308	-0.218082	-0.138827	0.0613703	0.0407393	-0.191051	0.0227766	-0.0213414	0.00229324	0.0380533	-0.0388745	0.0573479	0.0411531	0.00534092	-0.0574432	0.0120975	0.011994	-0.0406032	0.00136016	-0.0232827	0.0673911	-0.0182224	0.019582	-0.0021424	-0.0278605	0.00417106	0.0182375	-0.0159265	-0.0232985	-0.0127245	0.026452	-0.0640226	0.0497123	0.0166077	0.0708978	-0.0653232	-0.0419635	0.0240709	-0.0157002	0.111836
	a609	0.0837415	-0.0111181	0.0707401	0.0891396	0.108794	0.109153	-0.0342931	-0.160507	-0.0533484	0.16702	0.144514	-0.0887427	-0.120156	-0.0080373	0.0086073	-0.0488973	0.0122482	-0.0450395	-0.00312031	-0.0339817	-0.0145798	-0.00415928	-0.0128019	0.0219158	0.00597705	-0.0118355	0.00788004	0.042746	-0.105309	0.0122183	-0.0714507	-0.0334119	0.0206029	-0.0185227	-0.0234591	0.0469437	0.0354605	0.0340796	-0.0311883	0.070676	-0.0296301	0.0315203	-0.0262981	0.0545358	-0.0675813	-0.0234146	-0.0508813	0.0326061
	a610	-0.000251729	0.00129073	-0.00313459	-0.00703088	-0.00727142	-0.00442413	-0.0131244	0.0103686	0.00361757	-0.0115364	-0.0256799	0.00500453	0.000520497	-0.00114577	-0.000464915	0.00120151	-0.000748687	0.00107983	-0.00569317	0.00270468	0.00693343	-0.019523	0.000896132	-0.000212304	0.00424828	0.000964631	-0.00633383	-0.0023479	0.00399938	-0.00660833	0.00341045	0.000884915	0.000297432	-0.00046767	0.000577005	-0.000898681	0.00125635	-0.000775289	0.000213717	-0.00284899	-0.000849707	0.0013989	0.000756923	-0.00147548	0.00206587	-0.00074944	-0.00173149	-0.00302785
	a611	0.0158903	0.0108212	-0.00420517	0.0234684	-0.0556192	0.00927855	-0.0164332	-0.0130406	0.00458891	-0.0085099	-0.0399829	-0.00493302	-0.0331506	-0.00911912	0.00508274	-0.013778	0.0750623	0.00889363	-3.2464e-05	0.000413076	0.00318455	-0.0030009	-0.00791905	0.00835867	0.00202378	-0.00507551	-0.0020675	0.0125649	0.000936917	-0.00527378	-0.0079311	-0.00764047	-0.000477036	0.0194256	-0.00401901	-0.000272733	0.000773287	0.000724025	-0.020893	0.000350236	-0.00392414	-0.0210792	0.00341541	-0.000524676	-0.00163752	0.000721557	-0.00734747	0.000608703
	a612	-0.112846	0.0249616	-0.00401736	-0.312519	-0.166371	-0.184865	-0.0274127	0.152233	0.0485028	-0.0293326	-0.220615	0.178067	0.168949	0.121239	-0.0209304	0.0901352	-0.020662	0.0496146	0.0314095	0.0286855	-0.0102805	-0.00278956	0.056503	-0.0222629	-0.0159728	0.0437543	-0.0172027	-0.0508559	0.113922	-0.0217359	0.111937	0.0317587	-0.00750971	0.016823	0.00785505	-0.0572198	-0.0401703	-0.0347187	0.0466844	-0.0359417	-0.0269362	-0.0616681	0.0570178	-0.0992403	0.200401	-0.0417309	0.0265962	-0.157082
	a613	0.0925346	-0.0328286	0.0979331	0.0819165	0.0397808	0.142247	0.0113439	-0.217583	-0.111027	0.257026	0.141362	-0.21431	0.0142765	0.0971883	-0.0221129	0.00707967	-0.00601622	-0.0160512	0.00715023	-0.0463197	-0.0032324	-0.00633695	0.0452391	-0.0354667	-0.00754102	0.0189532	0.000742899	0.0230193	-0.085135	0.0217535	-0.050425	0.00964483	0.0187985	-0.00116522	0.000338496	0.0209469	0.0142068	0.0247326	-0.0449614	0.0563129	-0.00274314	-0.0121655	-0.0809251	0.0853942	-0.0948838	0.0469883	0.0373659	0.0565072
	a614	-0.124207	0.0824093	-0.093469	-0.231175	-0.034158	-0.2292	-0.0621969	0.263163	0.145579	-0.248912	-0.15041	0.32968	-0.0399646	-0.107931	0.029264	-0.00627734	0.0259796	0.0173121	-0.000230691	0.0613247	-0.00756519	0.0119532	-0.0547995	0.0558827	0.0192045	-0.0190957	-0.0159335	-0.0281667	0.0999725	-0.0245057	0.0715259	-0.0240481	-0.0180938	0.00162714	-0.0147442	-0.0249997	-0.0155471	-0.0305034	0.049274	-0.0483453	-0.0327772	0.0217087	0.135017	-0.1428	0.157057	-0.0886167	-0.0627007	-0.0922789
	a615	-0.115686	0.0414041	0.0205917	-0.354514	-0.127177	-0.182761	-0.0627116	0.138463	0.0570857	0.033194	-0.20989	0.240302	0.1228	0.154311	-0.0108921	0.0737937	-0.00533606	0.030404	0.0414065	0.024397	-0.0288723	-0.00188547	0.0491359	0.00740724	-0.0072414	0.0408041	-0.019952	-0.0376887	0.090105	-0.0158159	0.104259	0.0117838	-0.000919126	0.0106169	-0.00879777	-0.0427539	-0.0263297	-0.0306628	0.0382936	-0.0141906	-0.0541363	-0.0456029	0.0942766	-0.111992	0.241862	-0.123971	-0.0635696	-0.208988
	a616	-0.297457	0.0917997	-0.138946	-0.456972	-0.558182	-0.372004	0.0666709	0.528938	0.150998	-0.503895	-0.569685	0.564253	0.329539	-0.00257364	-0.0171807	0.129625	-0.0303999	0.105164	0.0195262	0.0961754	0.0202355	0.00583006	0.0324011	-0.0150244	-0.0155745	0.0356322	-0.024305	-0.0956454	0.283712	-0.0628317	0.206558	0.06709	-0.0313639	0.0317703	0.037703	-0.106212	-0.0824877	-0.064795	0.103936	-0.114277	0.0305644	-0.136933	0.073839	-0.0930709	0.125988	-0.0315147	0.00227042	-0.0762162
	a617	0.115964	0.0768863	0.131134	-0.555741	0.178036	-0.254309	-0.26453	0.16826	0.152361	0.298495	0.482348	0.445162	-0.338866	0.174765	0.033004	-0.0772739	0.0942804	-0.0947768	0.0533089	-0.0548178	-0.0848652	0.000129413	-0.024253	0.100157	0.020264	0.00329194	-0.00581853	0.0538164	-0.0795672	0.0458897	-0.0284586	-0.0883943	0.0299373	-0.0149885	-0.0815675	0.0556861	0.0790387	0.0138416	-0.0315149	0.09522	-0.174652	0.0695497	-0.0360004	0.0604954	-0.0301211	-0.0287657	-0.0295673	-0.0194017
CP43'	a502	0.000480751	0.00121613	0.000189498	0.000156198	0.000517097	0.000480451	0.000635127	-0.000267975	-0.000449525	4.28064e-05	7.69773e-05	-0.000713001	0.00043933	0.000238307	-1.65891e-05	7.18204e-05	-0.000145101	0.00314847	0.000116754	-0.000278207	-0.000635842	-0.00334788	0.000120056	-0.000108384	-0.000292787	8.91962e-05	-0.00139814	0.00114596	0.00248893	-0.00186191	-0.000169472	0.00034499	0.000100241	0.00290239	0.000414468	-0.000874285	-0.00124202	-0.000126603	-0.0104808	-4.97957e-05	-1.34545e-05	-0.000421926	-0.00137259	0.00267216	-0.00550345	0.0222631	0.0695316	0.0019906
	a503	0.0132742	-0.00291066	0.000589154	0.0410614	0.00755621	0.0278735	0.0105575	-0.0210418	-0.0100209	0.00318479	0.0209207	-0.0184054	-0.0182995	-0.0239336	0.00426656	-0.0178384	0.00556399	-0.00741348	-0.00755666	-0.00230374	0.00392223	0.000652715	-0.0113123	0.00625203	0.00353316	-0.0109635	0.00597911	0.0106518	-0.0187743	0.00325155	-0.0215636	-0.00348453	0.00145819	-0.00269183	0.000840813	0.0124152	0.00998071	0.00677657	-0.00804809	0.00846176	0.00918129	0.00666531	0.0472416	-0.0525471	0.0398178	0.00487506	0.0285858	0.00619124
	a501	0.0107563	-0.0102444	0.00876871	0.000467896	-0.0140274	0.00889074	0.00844518	-0.0149197	-0.0145163	0.0164131	0.00636418	-0.0254072	0.018769	0.0181642	-0.0086577	0.00931364	-0.00724288	0.00218695	0.00089998	-0.00822985	0.00198215	-0.00206143	0.0119859	-0.0153769	-0.00634836	0.00704459	0.00189819	-0.00145093	-0.000275759	0.000290058	-0.00110676	0.012061	0.00107897	0.00275975	0.00656632	-0.00383695	-0.00342955	0.00118769	-0.000668767	-0.000738306	0.00583919	-0.0121339	-0.104296	0.190124	-0.273631	-0.0721674	-0.347715	0.227349
	a504	0.0140739	-0.0122436	0.0132073	0.00330178	-0.0166788	0.01556	0.00969921	-0.0226301	-0.0199217	0.022995	0.0104827	-0.030077	0.0170786	0.0202097	-0.00943807	0.00802156	-0.00734238	-0.000297902	0.000684861	-0.0102893	0.0014953	-0.00250048	0.0126503	-0.0150852	-0.00638822	0.00701402	0.00247267	0.00137144	-0.00519833	0.00186472	-0.00520513	0.0131282	0.00316419	0.00199025	0.00651044	-0.00103121	-0.00185305	0.00332902	-0.00479312	0.00364728	0.00618366	-0.0148418	-0.0742891	0.125334	-0.167796	-0.0497681	-0.173408	0.111422
	a505	-0.0125323	0.00142695	0.00917191	-0.0614507	-0.016739	-0.0331556	-0.0153141	0.0189418	0.00646954	0.0133112	-0.0251544	0.0176408	0.0275329	0.0463518	-0.00864818	0.027011	-0.00551131	0.00702848	0.0132666	-0.00220204	-0.00826881	-0.00253653	0.021684	-0.0101754	-0.00692994	0.0185749	-0.00499408	-0.0114612	0.0210483	-0.00327601	0.027238	0.00613278	0.00114875	0.00385649	-0.00187222	-0.0150717	-0.00883651	-0.00871745	0.00972151	-0.00458092	-0.0148013	-0.0114722	-0.0838098	0.0990769	-0.0241254	-0.079476	-0.107404	-0.0751849
	a506	-0.0131689	0.00723986	-0.00799013	-0.0145202	0.000998362	-0.0150715	-0.00497175	0.0174342	0.0114727	-0.0141658	-0.0141947	0.0191319	0.00231702	-0.000543351	0.00326494	0.00235247	0.00266465	0.00341666	0.0015746	0.00675066	-0.00127245	0.000808602	-0.00231629	0.00468942	0.000760056	-0.000409789	-0.000252456	-0.00485062	0.00921217	-0.00540713	0.00956731	-0.00341854	-0.00269252	0.000282169	-0.00170575	-0.00379542	-0.00314491	-0.00432089	0.00588168	-0.0063801	-0.00366177	0.00269572	0.0448708	-0.116348	0.21411	-0.0212208	0.139292	-0.239431
	a507	0.0047663	-0.0100048	0.0105757	-0.0188561	-0.00804596	-0.00415664	-0.00155648	-0.00519836	-0.00711475	0.0173729	-0.00115751	-0.0106066	0.0169179	0.0259561	-0.00829686	0.0140883	-0.00596068	0.00137037	0.00427798	-0.00719547	-0.00208189	-0.00139659	0.0146103	-0.0121753	-0.00682893	0.0109301	-0.00181251	-0.00305088	0.00497836	-0.000296087	0.00744781	0.00787769	0.00218469	0.0065176	0.0019444	-0.00582537	-0.00467949	-0.0033286	0.000873111	0.000950062	-0.0033043	-0.00706547	-0.104188	0.1772	-0.254202	-0.0170579	-0.180544	0.207114
	a508	0.0179053	0.00293367	0.0142465	0.0275483	0.0305985	0.0227204	-0.0103508	-0.0227266	-0.00423686	0.0230181	0.0368703	0.00143133	-0.0496629	-0.0200283	0.00732646	-0.0230483	0.0110786	-0.020339	-0.00287952	-0.00702769	-0.00616765	0.00100291	-0.0129881	0.0194686	0.00714221	-0.00877539	0.00203112	0.0190798	-0.0306004	0.00947354	-0.0235643	-0.0162562	0.00810027	-0.00696208	-0.0111519	0.0201005	0.015949	0.00914002	-0.0150953	0.0255749	-0.00943487	0.0145314	0.0378647	-0.0191207	0.0659634	-0.121236	-0.15122	-0.056189
	a509	-0.0170642	0.00915402	-0.017012	-0.00762491	-0.00140792	-0.0161962	-2.27736e-05	0.024048	0.015062	-0.0285972	-0.0200009	0.0200991	0.00664953	-0.00936876	0.0049077	0.000641931	0.000778417	0.010074	-0.000706974	0.0105802	0.00304106	8.14102e-05	-0.00613379	0.00396062	0.00295894	-0.00368292	-0.00105398	-0.00791749	0.0141085	-0.0106766	0.0104749	-0.00227061	-0.00620001	0.00132269	0.00116388	-0.00755608	-0.00441523	-0.00330318	0.00528971	-0.0143041	0.00207295	0.00576287	0.0516856	-0.106914	0.158702	0.0485177	0.200658	-0.133292
	a510	0.0199079	-0.00850306	0.0247177	-0.000989623	0.00198783	0.0156855	-0.00493914	-0.02851	-0.018093	0.0400936	0.0243798	-0.0203557	-0.00785813	0.0191886	-0.00715411	0.00236086	-0.00142342	-0.0107113	0.00336174	-0.0142149	-0.00544627	-0.00238359	0.0105993	-0.00475918	-0.00345669	0.00759024	0.00155369	0.00971888	-0.0171216	0.00667853	-0.00963288	0.00226902	0.0091506	-0.00135784	-0.00307801	0.00642356	0.00593746	0.00549185	-0.00995187	0.0198529	-0.00750897	-0.00703952	-0.0665947	0.12909	-0.149699	-0.0959817	-0.227265	0.0926446
	a511	0.00746669	0.00279075	0.0181281	-0.0146424	0.0146486	-0.00283156	-0.0181839	-0.00708835	0.000472492	0.0268278	0.0151345	0.0119993	-0.0249633	0.00856505	0.0005261	-0.00300683	0.00491259	-0.0126756	0.00463594	-0.00712811	-0.00934464	-0.00129253	0.00216812	0.0101641	0.00274695	0.0038567	-0.0023792	0.00981556	-0.0129381	0.00897889	-0.00342332	-0.0106051	0.00813579	-0.00523199	-0.0109859	0.00830798	0.00830049	0.00318663	-0.00576516	0.0205224	-0.0176274	0.00492833	-0.00602785	0.0291484	0.0165629	-0.09644	-0.11461	-0.0416969
	a512	0.0163413	-0.00248722	0.00875453	0.0313825	0.0117158	0.0253372	0.00334275	-0.0236929	-0.0109462	0.0148201	0.026787	-0.0144526	-0.0245434	-0.0166955	0.00290634	-0.0163269	0.00505451	-0.011358	-0.00562858	-0.00569633	0.000245945	0.000410761	-0.00831279	0.00760618	0.00328045	-0.00764621	0.0031467	0.0134751	-0.022281	0.00643409	-0.0211111	-0.00517266	0.00491534	-0.00397887	-0.00256092	0.0139943	0.0100389	0.00825603	-0.0117696	0.0156344	0.00215253	0.00441012	0.0424915	-0.0381991	0.0428001	-0.0330316	-0.0209708	-0.0086332
	a513	0.00325278	-0.00347796	0.0133255	-0.0254892	-0.00470908	-0.00907468	-0.00881374	-0.0016698	-0.0036952	0.0191927	-9.0905e-06	-0.0007031	0.00762849	0.0250354	-0.00734832	0.0131899	-0.0033823	-0.0017668	0.00675369	-0.0071429	-0.00564697	-0.00213607	0.013627	-0.00705796	-0.00467187	0.0117751	-0.00123376	-0.000825382	0.00313485	0.000957544	0.0084143	0.00352539	0.00464925	0.00143174	-0.00236814	-0.00441062	-0.00153553	-0.00177168	0.000973667	0.00601806	-0.00984141	-0.00695204	-0.0627882	0.109619	-0.118786	-0.0683619	-0.155132	0.0680197
RC	a405	-0.00193101	0.00404912	-0.0681778	0.116155	0.0183616	0.0125945	0.0477555	0.0141782	0.0170568	-0.130689	-0.0103853	-0.0207209	-0.0549608	-0.300871	0.0177273	-0.0525646	-0.00150238	-0.000128656	-0.0166941	0.029651	0.0374028	0.0180942	-0.0724427	0.0127289	0.0197277	-0.0438673	0.00608599	0.0182893	-0.00700427	-0.00522981	-0.0391054	-0.0140496	-0.00845914	-0.0173969	0.00586615	0.0246549	0.00217613	0.00999746	-0.00321212	-0.0104439	0.0354134	0.0246107	-0.0913687	0.0696395	-0.00121144	0.0704219	0.059862	-0.00556642
	a406	-0.0199264	-0.0517195	0.0979083	-0.201326	-0.0931829	-0.0217886	0.0117677	-0.0647139	-0.0640424	0.311463	-0.069021	-0.151984	0.310373	0.433425	-0.0411285	0.115386	-0.0537877	0.0873041	0.0561664	-0.0046006	-0.000428773	-0.00785899	0.131654	-0.070327	-0.0171463	0.0592821	-0.00935495	-0.0475214	0.0602304	0.000315729	0.0800063	0.0521596	-0.0059554	0.0204842	0.0247541	-0.0469119	-0.032092	-0.0215629	0.00765736	-0.0136639	-0.00452254	-0.0596969	0.149482	-0.140197	-0.0130996	-0.0295534	-0.0702885	0.0843902
	a407	-0.0470577	0.0332911	-0.136243	0.164416	0.0566908	0.0101582	0.0395829	0.0558239	0.0523768	-0.2663	-0.0733902	0.0960835	-0.126745	-0.510001	0.0481961	-0.119212	0.0335434	-0.00305902	-0.110517	0.0911022	0.0608667	0.0223139	-0.161163	0.0559842	0.035432	-0.100815	0.014022	0.0286059	-0.018879	-0.00547999	-0.0707778	-0.0388611	-0.0151064	-0.0139254	0.00137163	0.0390037	0.0208913	0.0163117	-0.00859329	-0.018171	0.0526183	0.065131	-0.351218	0.187184	0.131917	0.204344	0.204088	-0.0350538
	a410	0.04277	-0.17824	0.0965039	0.859481	-0.275954	0.393289	0.402751	-0.419784	-0.3002	0.944437	-0.263441	-1.29411	0.908017	0.406126	-0.0671743	0.138224	-0.0837991	0.132525	-0.043159	-0.00977229	0.123911	0.00129773	0.214407	-0.181579	-0.037123	0.041473	0.0143777	-0.0450554	0.0089443	-0.00598994	-0.00141996	0.104394	-0.0235429	0.0140508	0.103213	-0.0412454	-0.04524	0.00366252	-0.00205245	-0.0539232	0.231736	-0.0746104	-0.00438715	-0.0174039	-0.0169742	0.0482082	0.0305578	0.0513162
	a402	0.0220957	-0.0441468	0.0906023	-0.137692	-0.0812722	-0.00875324	0.00662199	-0.0623769	-0.0616061	0.246794	0.00607872	-0.163422	0.221582	0.377793	-0.0432801	0.108305	-0.0681927	0.0511442	0.0490117	-0.0334231	-0.0117514	-0.0294887	0.131644	-0.0782528	-0.0291515	0.0658414	-0.00613366	-0.0443549	0.034326	-0.00638778	0.0651663	0.0490848	-0.00188572	0.0147109	0.0213271	-0.0437833	-0.04145	-0.0134404	0.012593	-0.0102944	-0.0080657	-0.0631288	0.24892	-0.200278	-0.134671	-0.0568485	-0.116613	0.202887
	a403	0.017112	-0.0164243	-0.0135424	0.0320073	-0.0215769	0.0131936	0.029017	-0.0174127	-0.0162954	-0.000229919	0.00754659	-0.0671627	0.052467	-0.0311125	-0.004893	0.00252254	-0.0184669	0.0243327	-0.0238094	0.0115092	0.0235059	-0.000590502	0.00111604	-0.0321011	-0.00470187	-0.00988141	0.00195736	-0.0107542	0.00388153	-0.00394743	-0.00674512	0.0139249	-0.00998167	0.00283406	0.0176705	-0.00541611	-0.0108503	0.000183596	0.00153604	-0.015592	0.0281277	-0.00617875	-0.256373	0.0347175	-0.163437	0.263284	0.11354	0.419151
RC'	a405	-0.0347456	0.00527427	-0.0214644	-0.0613902	-0.0336078	-0.0513443	-0.00278195	0.0510865	0.023001	-0.0381955	-0.0533591	0.038319	0.0440094	0.0122521	-0.0016882	0.0212378	-0.00407324	0.0207363	0.00499265	0.0155238	0.00373547	0.00116523	0.00697523	-0.00829409	-0.00221163	0.00547302	-0.0024997	-0.0208365	0.0389963	-0.0041895	0.0327978	0.00844219	-0.00985357	0.00365073	0.00635031	-0.0206068	-0.0147789	-0.00838027	0.0246699	-0.0267639	0.00160368	-0.0100852	0.0483249	-0.100305	0.0895217	0.122622	0.214759	-0.00450529
	a406	0.0251008	-0.0145835	0.00327795	0.0659104	0.00442438	0.0455662	0.0177144	-0.0364708	-0.0201586	0.00842863	0.0260623	-0.0446254	-0.016272	-0.0215271	0.00119169	-0.0162831	0.00331126	-0.00623961	-0.0105669	-0.00834934	0.00642444	-0.000659882	-0.00684448	-0.000940779	0.000371147	-0.0081664	0.0141275	0.00970035	-0.0205119	-0.000285944	-0.0252693	0.000181652	0.00237174	-0.00403289	0.00332204	0.0106561	0.00558309	0.0221174	-0.0281275	0.00639809	0.0139326	0.00448709	-0.0636275	0.12519	-0.208666	-0.0104406	-0.111571	0.17528
	a407	-0.0529731	0.015446	-0.044919	-0.065266	-0.037431	-0.0756306	0.00385065	0.0897574	0.0429898	-0.0833098	-0.0820644	0.060957	0.0561211	-0.00336877	0.00176777	0.0234324	-0.00690394	0.031004	0.00115709	0.0262215	0.00869107	0.00196443	0.000381116	-0.00673379	-0.00193418	0.00238871	-0.00621539	-0.0304471	0.0627113	-0.0181858	0.0456027	0.00997376	-0.0168625	0.00820149	0.0101047	-0.0294693	-0.0227253	-0.0195039	0.0317333	-0.0469456	0.00831353	-0.00566478	0.0550113	-0.106654	0.102276	0.0941816	0.167574	-0.0261448
	a410	-0.00447241	-0.00456174	-0.0251345	0.0403604	-0.0106864	0.0123136	0.0269533	0.0010616	-0.00209411	-0.0351125	-0.0112325	-0.0224955	0.0206526	-0.0380545	0.00408531	-0.0093124	-0.00375709	0.0141141	-0.0147536	0.0125195	0.0172505	0.00204857	-0.0133115	-0.00664782	0.00126392	-0.0147594	0.00367408	-0.00607446	0.00553205	-0.00492117	-0.00761455	0.00642703	-0.0098568	0.00189897	0.0124102	-0.00166315	-0.0052867	0.000915867	0.00313754	-0.0184195	0.0257897	0.000721741	0.0640148	-0.0511885	-0.512585	0.815016	1.11521	0.979808
	a402	0.0322578	-0.00490804	0.0110264	0.0770124	0.00745841	0.0600036	0.0265769	-0.0532079	-0.0294879	0.0257928	0.0381212	-0.0614596	-0.0155452	-0.0115441	-0.00176509	-0.0150595	-0.000776536	-0.00983708	-0.0051414	-0.0128021	0.00369716	-0.00279404	-0.00329148	-0.00419744	-0.000345534	-0.00652086	0.0110493	0.0188255	-0.0298426	0.0119066	-0.0313275	0.00153507	0.00378859	-0.00220476	0.00437547	0.0129259	0.0104533	0.0191872	0.000253645	0.0133759	0.0148678	0.00154233	-0.053572	0.0942059	-0.129072	-0.0197081	-0.0789335	0.0839815
	a403	-0.0132749	-0.0141716	-0.0381657	0.0594273	-0.0873769	0.0333368	0.0696165	0.0153551	-0.0170926	-0.0731666	-0.0417653	-0.0457608	0.0764561	-0.00805273	-0.00744256	0.0114858	-0.0183818	0.0252935	-0.0103809	0.00746791	0.0239799	-0.000364816	0.00369395	-0.0285711	-0.00811308	-0.00432968	0.00614492	-0.015612	0.0323006	-0.0125799	0.00130653	0.0358134	-0.013695	0.00916677	0.0313497	-0.0166731	-0.0187926	-0.00215488	0.0150864	-0.0466317	0.0567222	-0.0322524	-0.017824	0.0144726	-0.0566365	0.050451	0.0282869	0.0631841
[truncated: 158 more columns]
